# Supplementary material for: Simulated Space Environmental Factors of Weightlessness, Noise and Low Air Pressure Differentially Affect the Circadian Rhythm and Gut Microbiome
Source: Research Square preprint supplement (doi:10.21203/rs.3.rs-362076/v1), 2021-04-05
Supplement: Supplementary file 1 [file 73a297930e9a3d708b61b658.xlsx]

## Sheet: Table S6
Supplementary Table S4. Predicted KEGG pathways of rhythmic genes in hypothalamus
Statistical test method: hypergeometric test / Fisher's exact test. FDR correction method: Benjamini and Hochberg.
Rhythmic in SSC.Ctrl.Early, arrhythmic in SSC.HU.Early
Pathway_Name	KEGG_ID	Input_number	Background_number	P-Value	Corrected P-Value
Human papillomavirus infection	mmu05165	12	361	1.66124e-06	0.000344246
Proteoglycans in cancer	mmu05205	9	206	4.1566e-06	0.000646004
Toxoplasmosis	mmu05145	5	108	0.000470585	0.0216008
Hepatocellular carcinoma	mmu05225	6	171	0.000533956	0.0223322
Pathways in cancer	mmu05200	10	535	0.00115809	0.034751
Measles	mmu05162	5	144	0.00162802	0.0430867
ECM-receptor interaction	mmu04512	4	86	0.00173302	0.0430867
Epstein-Barr virus infection	mmu05169	6	230	0.00233142	0.0477092
Arrhythmic in SSC.Ctrl.Early, rhythmic in SSC.HU.Early
Pathway_Name	KEGG_ID	Input_number	Background_number	P-Value	Corrected P-Value
Metabolic pathways	mmu01100	90	1494	1.95121e-16	5.306e-14
Pathways in cancer	mmu05200	35	535	6.0117e-08	6.28762e-06
Hippo signaling pathway	mmu04390	17	154	2.51324e-07	2.32988e-05
Fatty acid metabolism	mmu01212	11	61	4.6196e-07	4.18741e-05
Endocytosis	mmu04144	22	270	6.15692e-07	5.34342e-05
Proteoglycans in cancer	mmu05205	19	206	6.45171e-07	5.48261e-05
Human papillomavirus infection	mmu05165	25	361	1.77357e-06	0.000126919
Protein processing in endoplasmic reticulum	mmu04141	16	163	2.32106e-06	0.000160468
Hepatitis C	mmu05160	15	160	7.95438e-06	0.000438458
Regulation of actin cytoskeleton	mmu04810	17	217	1.82057e-05	0.000834392
Cushing syndrome	mmu04934	14	159	3.0138e-05	0.00126735
Phagosome	mmu04145	15	181	3.05509e-05	0.0012716
PI3K-Akt signaling pathway	mmu04151	22	358	4.06344e-05	0.00160906
Tight junction	mmu04530	14	167	4.95588e-05	0.00178894
Bacterial invasion of epithelial cells	mmu05100	9	74	8.52182e-05	0.00282281
Leukocyte transendothelial migration	mmu04670	11	115	0.000106851	0.00337304
Wnt signaling pathway	mmu04310	13	162	0.000136883	0.00416675
Biosynthesis of unsaturated fatty acids	mmu01040	6	32	0.000163532	0.00489381
Cell cycle	mmu04110	11	123	0.000184728	0.00512589
Peroxisome	mmu04146	9	84	0.000205477	0.0056251
Breast cancer	mmu05224	12	147	0.000211215	0.00574365
Hepatocellular carcinoma	mmu05225	13	171	0.000224811	0.0059935
Gastric cancer	mmu05226	12	150	0.000251145	0.00657702
Focal adhesion	mmu04510	14	199	0.000276715	0.00688244
Inositol phosphate metabolism	mmu00562	8	73	0.00039966	0.00876458
cAMP signaling pathway	mmu04024	14	213	0.00052487	0.0109792
Synaptic vesicle cycle	mmu04721	8	77	0.00055403	0.0112432
Phosphatidylinositol signaling system	mmu04070	9	98	0.000584572	0.0116886
Lysosome	mmu04142	10	124	0.000759814	0.0139607
Phospholipase D signaling pathway	mmu04072	11	149	0.000837324	0.0148498
Adrenergic signaling in cardiomyocytes	mmu04261	11	152	0.000975109	0.0167121
PPAR signaling pathway	mmu03320	8	87	0.00115671	0.0187232
Dopaminergic synapse	mmu04728	10	135	0.00138772	0.0208106
Fatty acid biosynthesis	mmu00061	4	19	0.00144529	0.0212828
One carbon pool by folate	mmu00670	4	19	0.00144529	0.0212828
Fanconi anemia pathway	mmu03460	6	51	0.00151299	0.0214288
Rap1 signaling pathway	mmu04015	13	214	0.00160166	0.0223429
Ubiquitin mediated proteolysis	mmu04120	10	139	0.00170074	0.0233319
Adherens junction	mmu04520	7	72	0.00173239	0.0234765
Gastric acid secretion	mmu04971	7	74	0.00200176	0.0254367
Glioma	mmu05214	7	75	0.00214804	0.0269595
Prostate cancer	mmu05215	8	97	0.00219457	0.0272916
Yersinia infection	mmu05135	9	123	0.00255918	0.0297404
Melanogenesis	mmu04916	8	100	0.0026177	0.0303341
Human cytomegalovirus infection	mmu05163	14	256	0.00271343	0.0310901
Endometrial cancer	mmu05213	6	58	0.00274869	0.0314059
AMPK signaling pathway	mmu04152	9	126	0.00297688	0.033359
Glycosaminoglycan biosynthesis - heparan sulfate / heparin	mmu00534	4	24	0.00306502	0.0339734
Ras signaling pathway	mmu04014	13	233	0.00322078	0.0344261
Ferroptosis	mmu04216	5	41	0.00323245	0.0344261
Parathyroid hormone synthesis, secretion and action	mmu04928	8	107	0.00385298	0.0389825
ErbB signaling pathway	mmu04012	7	84	0.00386598	0.0389825
Basal cell carcinoma	mmu05217	6	63	0.00401021	0.039416
Aminoacyl-tRNA biosynthesis	mmu00970	6	66	0.0049476	0.0460759
Signaling pathways regulating pluripotency of stem cells	mmu04550	9	138	0.00521158	0.0477709
Cholinergic synapse	mmu04725	8	113	0.00523362	0.0478653
GABAergic synapse	mmu04727	7	90	0.00548755	0.0495896
Rhythmic in AR.Ctrl.Early, arrhythmic in AR.HU.Early
Pathway_Name	KEGG_ID	Input_number	Background_number	P-Value	Corrected P-Value
Ras signaling pathway	mmu04014	8	233	0.00107613	0.0403152
Focal adhesion	mmu04510	7	199	0.00191335	0.0497036
Arrhythmic in AR.Ctrl.Early, rhythmic in AR.HU.Early
Pathway_Name	KEGG_ID	Input_number	Background_number	P-Value	Corrected P-Value
Metabolic pathways	mmu01100	37	1494	2.74146e-05	0.0027395
Herpes simplex virus 1 infection	mmu05168	17	439	3.09494e-05	0.00298608
Calcium signaling pathway	mmu04020	10	194	0.000153686	0.0104882
Dilated cardiomyopathy (DCM)	mmu05414	7	95	0.000197718	0.0120264
Signaling pathways regulating pluripotency of stem cells	mmu04550	8	138	0.000330397	0.0192594
Viral myocarditis	mmu05416	6	89	0.000875371	0.0371104
Hypertrophic cardiomyopathy (HCM)	mmu05410	6	91	0.000976137	0.038468
Cell adhesion molecules (CAMs)	mmu04514	8	171	0.00125665	0.0456638
Rhythmic in SSC.Ctrl.Late, arrhythmic in SSC.HU.Late
Pathway_Name	KEGG_ID	Input_number	Background_number	P-Value	Corrected P-Value
Fluid shear stress and atherosclerosis	mmu05418	12	143	2.1808e-06	0.00033387
Metabolic pathways	mmu01100	43	1494	1.70064e-05	0.0013018
Hepatitis B	mmu05161	10	163	0.000180225	0.00871045
Nicotinate and nicotinamide metabolism	mmu00760	5	36	0.000263788	0.0107352
Pyrimidine metabolism	mmu00240	6	58	0.00027953	0.0111967
ErbB signaling pathway	mmu04012	7	84	0.000301955	0.011421
Complement and coagulation cascades	mmu04610	7	88	0.000392922	0.0137309
PI3K-Akt signaling pathway	mmu04151	14	358	0.000883974	0.023539
Proteoglycans in cancer	mmu05205	10	206	0.00102861	0.0263925
Axon guidance	mmu04360	9	180	0.0014908	0.0323846
TNF signaling pathway	mmu04668	7	113	0.0015687	0.0326093
Autophagy - other	mmu04136	4	32	0.00158229	0.0326093
Galactose metabolism	mmu00052	4	32	0.00158229	0.0326093
Epstein-Barr virus infection	mmu05169	10	230	0.00224305	0.0411399
Protein processing in endoplasmic reticulum	mmu04141	8	163	0.00299506	0.0498918
Arrhythmic in SSC.Ctrl.Late, rhythmic in SSC.HU.Late
Pathway_Name	KEGG_ID	Input_number	Background_number	P-Value	Corrected P-Value
Metabolic pathways	mmu01100	133	1494	1.89612e-17	5.30281e-15
Endocytosis	mmu04144	38	270	1.24908e-10	1.28324e-08
mTOR signaling pathway	mmu04150	26	155	4.2177e-09	3.59865e-07
Human papillomavirus infection	mmu05165	40	361	2.09521e-08	1.57422e-06
Autophagy - animal	mmu04140	22	130	5.58851e-08	3.70166e-06
Choline metabolism in cancer	mmu05231	19	99	7.89857e-08	5.03309e-06
Pathways in cancer	mmu05200	48	535	3.31624e-07	1.81456e-05
GnRH signaling pathway	mmu04912	17	90	4.58048e-07	2.45299e-05
Thermogenesis	mmu04714	27	232	1.7013e-06	8.31487e-05
Signaling pathways regulating pluripotency of stem cells	mmu04550	20	138	1.93969e-06	9.21172e-05
Gap junction	mmu04540	15	86	5.08074e-06	0.00021675
Apoptosis	mmu04210	19	136	5.59533e-06	0.000234724
Endocrine resistance	mmu01522	15	93	1.17252e-05	0.000450569
Regulation of actin cytoskeleton	mmu04810	24	217	1.36011e-05	0.000512765
Hepatitis C	mmu05160	20	160	1.42173e-05	0.00052625
Long-term depression	mmu04730	12	61	1.53907e-05	0.000557387
Oxidative phosphorylation	mmu00190	18	134	1.57891e-05	0.000563703
ErbB signaling pathway	mmu04012	14	84	1.64047e-05	0.000579747
Proteoglycans in cancer	mmu05205	23	206	1.77733e-05	0.000617041
Phosphatidylinositol signaling system	mmu04070	15	98	2.03736e-05	0.000692977
Hippo signaling pathway	mmu04390	19	154	2.71614e-05	0.000865384
Synaptic vesicle cycle	mmu04721	13	77	2.89189e-05	0.000914835
Hepatocellular carcinoma	mmu05225	20	171	3.37714e-05	0.00102413
Parkinson disease	mmu05012	18	144	3.74693e-05	0.00112274
FoxO signaling pathway	mmu04068	17	132	4.35033e-05	0.00127323
Acute myeloid leukemia	mmu05221	12	69	4.50239e-05	0.00129514
Breast cancer	mmu05224	18	147	4.78205e-05	0.00136005
Prolactin signaling pathway	mmu04917	12	72	6.49234e-05	0.00174897
Sphingolipid signaling pathway	mmu04071	16	124	7.07543e-05	0.00184598
Tight junction	mmu04530	19	167	7.35008e-05	0.00189745
MAPK signaling pathway	mmu04010	27	294	8.16647e-05	0.00207626
Focal adhesion	mmu04510	21	199	8.45689e-05	0.0021286
TNF signaling pathway	mmu04668	15	113	8.84806e-05	0.00220501
Viral carcinogenesis	mmu05203	23	231	8.95233e-05	0.00221576
Mitophagy - animal	mmu04137	11	63	8.97922e-05	0.00221576
Melanogenesis	mmu04916	14	100	9.04835e-05	0.00222192
Autophagy - other	mmu04136	8	32	9.68084e-05	0.00232064
Ras signaling pathway	mmu04014	23	233	0.000100754	0.00240336
T cell receptor signaling pathway	mmu04660	14	103	0.000120026	0.00269684
Progesterone-mediated oocyte maturation	mmu04914	13	90	0.000120538	0.00269684
Relaxin signaling pathway	mmu04926	16	131	0.000126592	0.00281975
Alzheimer disease	mmu05010	19	175	0.000128788	0.00283108
Fc gamma R-mediated phagocytosis	mmu04666	13	92	0.000146808	0.0031718
PI3K-Akt signaling pathway	mmu04151	30	358	0.000154272	0.00331883
Estrogen signaling pathway	mmu04915	16	134	0.000160416	0.00342175
Renal cell carcinoma	mmu05211	11	68	0.000163865	0.00346596
Fc epsilon RI signaling pathway	mmu04664	11	68	0.000163865	0.00346596
Phospholipase D signaling pathway	mmu04072	17	149	0.000167061	0.00351877
Carbon metabolism	mmu01200	15	121	0.000175523	0.00366631
Neurotrophin signaling pathway	mmu04722	15	121	0.000175523	0.00366631
Legionellosis	mmu05134	10	58	0.00020362	0.00405147
Endometrial cancer	mmu05213	10	58	0.00020362	0.00405147
Collecting duct acid secretion	mmu04966	7	27	0.000218645	0.00428273
Prostate cancer	mmu05215	13	97	0.000234935	0.00453128
Chemokine signaling pathway	mmu04062	20	200	0.000237517	0.00456359
Insulin signaling pathway	mmu04910	16	140	0.000252268	0.00482859
Inositol phosphate metabolism	mmu00562	11	73	0.000284364	0.00530182
Osteoclast differentiation	mmu04380	15	128	0.000304815	0.00557978
Colorectal cancer	mmu05210	12	88	0.000349856	0.00626753
Human cytomegalovirus infection	mmu05163	23	256	0.000353691	0.00631376
GABAergic synapse	mmu04727	12	90	0.000420392	0.0073481
Oocyte meiosis	mmu04114	14	119	0.000460907	0.00787434
cAMP signaling pathway	mmu04024	20	213	0.000500322	0.00831227
Gastric cancer	mmu05226	16	150	0.000506908	0.00834338
Retrograde endocannabinoid signaling	mmu04723	16	150	0.000506908	0.00834338
Dopaminergic synapse	mmu04728	15	135	0.000508823	0.00834338
Aminoacyl-tRNA biosynthesis	mmu00970	10	66	0.000511076	0.00835311
Rap1 signaling pathway	mmu04015	20	214	0.00052831	0.00852408
Parathyroid hormone synthesis, secretion and action	mmu04928	13	107	0.000551414	0.00878424
Central carbon metabolism in cancer	mmu05230	10	67	0.000568005	0.00901999
EGFR tyrosine kinase inhibitor resistance	mmu01521	11	80	0.000571967	0.00905434
Cell cycle	mmu04110	14	123	0.000621615	0.00965805
RIG-I-like receptor signaling pathway	mmu04622	10	68	0.000630078	0.00972948
Ubiquitin mediated proteolysis	mmu04120	15	139	0.000670918	0.0102345
Apelin signaling pathway	mmu04371	15	139	0.000670918	0.0102345
Insulin resistance	mmu04931	13	110	0.000697976	0.0105514
B cell receptor signaling pathway	mmu04662	11	83	0.000754153	0.0112653
Human immunodeficiency virus 1 infection	mmu05170	21	239	0.00081246	0.0119939
Cholinergic synapse	mmu04725	13	113	0.000876025	0.0127159
Cushing syndrome	mmu04934	16	159	0.000899714	0.0129151
Circadian entrainment	mmu04713	12	99	0.000904204	0.0129311
Huntington disease	mmu05016	18	194	0.00105614	0.0145233
Human T-cell leukemia virus 1 infection	mmu05166	21	246	0.00113669	0.0152753
Protein processing in endoplasmic reticulum	mmu04141	16	163	0.00114378	0.0152753
Glioma	mmu05214	10	75	0.00123991	0.0163705
Longevity regulating pathway - multiple species	mmu04213	9	62	0.00126119	0.0165713
Pyruvate metabolism	mmu00620	7	38	0.00129151	0.0167563
Alanine, aspartate and glutamate metabolism	mmu00250	7	38	0.00129151	0.0167563
Arginine and proline metabolism	mmu00330	8	50	0.00133506	0.0172325
Chronic myeloid leukemia	mmu05220	10	76	0.001357	0.0173929
RNA transport	mmu03013	16	167	0.0014416	0.0178605
Non-alcoholic fatty liver disease (NAFLD)	mmu04932	15	151	0.00144305	0.0178605
Kaposi sarcoma-associated herpesvirus infection	mmu05167	19	217	0.00145822	0.0178605
Biosynthesis of amino acids	mmu01230	10	78	0.00161816	0.0197236
Yersinia infection	mmu05135	13	123	0.00176639	0.0210711
Non-small cell lung cancer	mmu05223	9	66	0.00186348	0.0220724
Vascular smooth muscle contraction	mmu04270	14	140	0.00193312	0.0224742
TGF-beta signaling pathway	mmu04350	11	95	0.00202825	0.0233116
Glycolysis / Gluconeogenesis	mmu00010	9	67	0.00204515	0.0233116
Ribosome	mmu03010	16	175	0.00223522	0.0250047
Fluid shear stress and atherosclerosis	mmu05418	14	143	0.0023139	0.0256568
Measles	mmu05162	14	144	0.0024538	0.026394
HIF-1 signaling pathway	mmu04066	12	114	0.00268864	0.0277349
Glutamatergic synapse	mmu04724	12	114	0.00268864	0.0277349
Hepatitis B	mmu05161	15	163	0.00285188	0.0291204
VEGF signaling pathway	mmu04370	8	58	0.00308091	0.0308145
Serotonergic synapse	mmu04726	13	132	0.00310972	0.0308764
Jak-STAT signaling pathway	mmu04630	15	165	0.00317131	0.0312262
Adherens junction	mmu04520	9	72	0.00317596	0.0312262
PD-L1 expression and PD-1 checkpoint pathway in cancer	mmu05235	10	88	0.00359994	0.0347167
Adrenergic signaling in cardiomyocytes	mmu04261	14	152	0.003843	0.0356883
Glycosaminoglycan biosynthesis - keratan sulfate	mmu00533	4	14	0.00386593	0.0356883
Cellular senescence	mmu04218	16	186	0.00389218	0.0356883
Pancreatic cancer	mmu05212	9	75	0.00406036	0.0366305
Type II diabetes mellitus	mmu04930	7	48	0.00418665	0.037501
Oxytocin signaling pathway	mmu04921	14	154	0.00427527	0.0381591
Morphine addiction	mmu05032	10	92	0.0047948	0.0413305
Thyroid cancer	mmu05216	6	37	0.00496425	0.042356
NF-kappa B signaling pathway	mmu04064	11	109	0.00530085	0.0438207
Aldosterone-regulated sodium reabsorption	mmu04960	6	38	0.00557022	0.045592
AMPK signaling pathway	mmu04152	12	126	0.00561448	0.045592
Necroptosis	mmu04217	15	177	0.00576203	0.045592
Tuberculosis	mmu05152	15	178	0.00603841	0.0474959
Butanoate metabolism	mmu00650	5	27	0.00621687	0.0479102
C-type lectin receptor signaling pathway	mmu04625	11	112	0.00636816	0.0486454
Rhythmic in AR.Ctrl.Late, arrhythmic in AR.HU.Late
Pathway_Name	KEGG_ID	Input_number	Background_number	P-Value	Corrected P-Value
Metabolic pathways	mmu01100	71	1494	1.23929e-10	2.85984e-08
Pathways in cancer	mmu05200	32	535	1.72674e-07	1.88166e-05
Huntington disease	mmu05016	16	194	5.45035e-06	0.000362402
Retrograde endocannabinoid signaling	mmu04723	14	150	5.67651e-06	0.000371149
Alzheimer disease	mmu05010	14	175	2.83875e-05	0.00144629
GABAergic synapse	mmu04727	10	90	3.14505e-05	0.00157887
Human cytomegalovirus infection	mmu05163	17	256	3.8902e-05	0.00184549
Dopaminergic synapse	mmu04728	12	135	4.06281e-05	0.00189743
Glutamatergic synapse	mmu04724	11	114	4.24531e-05	0.00193655
PI3K-Akt signaling pathway	mmu04151	20	358	8.36675e-05	0.00321792
Phospholipase D signaling pathway	mmu04072	12	149	9.80851e-05	0.00363007
Ras signaling pathway	mmu04014	15	233	0.000150115	0.00503333
Morphine addiction	mmu05032	9	92	0.000189557	0.00590183
Rap1 signaling pathway	mmu04015	14	214	0.000211109	0.00642001
Regulation of actin cytoskeleton	mmu04810	14	217	0.000241433	0.00712279
Human papillomavirus infection	mmu05165	19	361	0.000255907	0.00743647
Choline metabolism in cancer	mmu05231	9	99	0.000314043	0.00861533
Lysosome	mmu04142	10	124	0.000362827	0.00961738
Proteoglycans in cancer	mmu05205	13	206	0.000484125	0.0119448
Hippo signaling pathway	mmu04390	11	154	0.000493711	0.01203
Circadian rhythm	mmu04710	5	30	0.000606464	0.0144191
GnRH signaling pathway	mmu04912	8	90	0.000767925	0.0169245
Hypertrophic cardiomyopathy (HCM)	mmu05410	8	91	0.000821128	0.017896
Amyotrophic lateral sclerosis (ALS)	mmu05014	6	52	0.00101707	0.0212232
Dilated cardiomyopathy (DCM)	mmu05414	8	95	0.00106429	0.0220912
Parkinson disease	mmu05012	10	144	0.00107313	0.0221573
cGMP-PKG signaling pathway	mmu04022	11	173	0.00121183	0.0230926
Gastric cancer	mmu05226	10	150	0.00143158	0.0249483
Arrhythmogenic right ventricular cardiomyopathy (ARVC)	mmu05412	7	77	0.00143725	0.0249483
Synaptic vesicle cycle	mmu04721	7	77	0.00143725	0.0249483
MAPK signaling pathway	mmu04010	15	294	0.00147059	0.0252911
mTOR signaling pathway	mmu04150	10	155	0.00179968	0.0286998
Serotonergic synapse	mmu04726	9	132	0.00211173	0.0327444
Kaposi sarcoma-associated herpesvirus infection	mmu05167	12	217	0.00226822	0.0343561
Oxidative phosphorylation	mmu00190	9	134	0.00232389	0.0349844
Synthesis and degradation of ketone bodies	mmu00072	3	11	0.00241722	0.0353834
Purine metabolism	mmu00230	9	136	0.00255265	0.0368163
Th1 and Th2 cell differentiation	mmu04658	7	87	0.00274111	0.0388209
Apelin signaling pathway	mmu04371	9	139	0.00292885	0.0406003
Insulin signaling pathway	mmu04910	9	140	0.00306354	0.04173
Cell adhesion molecules (CAMs)	mmu04514	10	171	0.00351827	0.0458544
Arrhythmic in AR.Ctrl.Late, rhythmic in AR.HU.Late
Pathway_Name	KEGG_ID	Input_number	Background_number	P-Value	Corrected P-Value
Jak-STAT signaling pathway	mmu04630	12	165	4.62665e-06	0.000785714
Metabolic pathways	mmu01100	39	1494	8.42333e-05	0.00759943
Circadian rhythm	mmu04710	5	30	9.18413e-05	0.00779841
Thermogenesis	mmu04714	10	232	0.0015242	0.0491575
Rhythmic in SSC.Ctrl.Early, arrhythmic in SSC.Ctrl.Late
Pathway_Name	KEGG_ID	Input_number	Background_number	P-Value	Corrected P-Value
Human papillomavirus infection	mmu05165	12	361	1.5838e-06	0.000284925
Proteoglycans in cancer	mmu05205	9	206	4.00495e-06	0.000654991
Toxoplasmosis	mmu05145	5	108	0.00046091	0.0207294
Hepatocellular carcinoma	mmu05225	6	171	0.000521284	0.0218763
Pathways in cancer	mmu05200	10	535	0.00111897	0.035947
NOD-like receptor signaling pathway	mmu04621	6	206	0.00132787	0.0396218
Measles	mmu05162	5	144	0.00159575	0.0455675
ECM-receptor interaction	mmu04512	4	86	0.00170439	0.0460711
Arrhythmic in SSC.Ctrl.Early, rhythmic in SSC.Ctrl.Late
Pathway_Name	KEGG_ID	Input_number	Background_number	P-Value	Corrected P-Value
Fluid shear stress and atherosclerosis	mmu05418	14	143	2.58413e-07	4.67727e-05
ErbB signaling pathway	mmu04012	10	84	2.70186e-06	0.000276503
Metabolic pathways	mmu01100	49	1494	4.74908e-06	0.000453669
TNF signaling pathway	mmu04668	11	113	5.18656e-06	0.000482069
Hepatitis B	mmu05161	13	163	5.67436e-06	0.000500362
Proteoglycans in cancer	mmu05205	13	206	5.72678e-05	0.0031261
Epstein-Barr virus infection	mmu05169	13	230	0.000162495	0.00707366
Endocrine resistance	mmu01522	8	93	0.000220859	0.00883178
Kaposi sarcoma-associated herpesvirus infection	mmu05167	12	217	0.00034612	0.0113363
AGE-RAGE signaling pathway in diabetic complications	mmu04933	8	101	0.000371608	0.0114834
PI3K-Akt signaling pathway	mmu04151	16	358	0.000389612	0.0118132
T cell receptor signaling pathway	mmu04660	8	103	0.000420086	0.0124541
Nicotinate and nicotinamide metabolism	mmu00760	5	36	0.000474186	0.013151
Jak-STAT signaling pathway	mmu04630	10	165	0.000541798	0.0142232
Pyrimidine metabolism	mmu00240	6	58	0.000550837	0.014351
Apelin signaling pathway	mmu04371	9	139	0.000650969	0.0159906
Th1 and Th2 cell differentiation	mmu04658	7	87	0.00078598	0.0181616
Measles	mmu05162	9	144	0.000825485	0.0186628
Colorectal cancer	mmu05210	7	88	0.000837017	0.0186628
Complement and coagulation cascades	mmu04610	7	88	0.000837017	0.0186628
Breast cancer	mmu05224	9	147	0.000947277	0.0206183
Axon guidance	mmu04360	10	180	0.00101967	0.0213805
Yersinia infection	mmu05135	8	123	0.00124855	0.0246768
mRNA surveillance pathway	mmu03015	7	96	0.00134599	0.0257158
Prostate cancer	mmu05215	7	97	0.00142363	0.0266567
Osteoclast differentiation	mmu04380	8	128	0.00158555	0.0282506
Toll-like receptor signaling pathway	mmu04620	7	99	0.00158938	0.0282506
Autophagy - animal	mmu04140	8	130	0.00173897	0.030357
Relaxin signaling pathway	mmu04926	8	131	0.00181995	0.0307561
Th17 cell differentiation	mmu04659	7	102	0.00186573	0.0308603
Protein processing in endoplasmic reticulum	mmu04141	9	163	0.00186652	0.0308603
Spliceosome	mmu03040	8	133	0.00199083	0.032143
Antifolate resistance	mmu01523	4	30	0.00203532	0.0324049
Estrogen signaling pathway	mmu04915	8	134	0.00208088	0.0328263
Dopaminergic synapse	mmu04728	8	135	0.00217409	0.0338313
Salmonella infection	mmu05132	6	78	0.00228578	0.0350825
Autophagy - other	mmu04136	4	32	0.00252109	0.0368937
Galactose metabolism	mmu00052	4	32	0.00252109	0.0368937
Human T-cell leukemia virus 1 infection	mmu05166	11	246	0.00301802	0.0416826
Pathways in cancer	mmu05200	18	535	0.00378977	0.0473928
MAPK signaling pathway	mmu04010	12	294	0.00404471	0.0496137
Rhythmic in SSC.HU.Early, arrhythmic in SSC.HU.Late
Pathway_Name	KEGG_ID	Input_number	Background_number	P-Value	Corrected P-Value
Metabolic pathways	mmu01100	86	1494	1.51548e-16	4.94173e-14
Fatty acid metabolism	mmu01212	11	61	2.23718e-07	2.3037e-05
Hippo signaling pathway	mmu04390	15	154	2.14454e-06	0.000171256
Endocytosis	mmu04144	20	270	2.52638e-06	0.000193838
Phagosome	mmu04145	15	181	1.30982e-05	0.000766601
Human papillomavirus infection	mmu05165	22	361	1.52214e-05	0.000875903
Pathways in cancer	mmu05200	28	535	1.64519e-05	0.000919661
Protein processing in endoplasmic reticulum	mmu04141	14	163	1.74385e-05	0.000947736
Cushing syndrome	mmu04934	13	159	5.53258e-05	0.00230308
cAMP signaling pathway	mmu04024	15	213	7.54795e-05	0.00295351
Biosynthesis of unsaturated fatty acids	mmu01040	6	32	0.00010971	0.0039858
Peroxisome	mmu04146	9	84	0.000118927	0.00423057
Proteoglycans in cancer	mmu05205	14	206	0.000183402	0.00603069
Hepatitis C	mmu05160	12	160	0.00022445	0.00691554
Inositol phosphate metabolism	mmu00562	8	73	0.000244985	0.00727892
Leukocyte transendothelial migration	mmu04670	10	115	0.000247309	0.00727892
Wnt signaling pathway	mmu04310	12	162	0.000249728	0.00727892
Gastric acid secretion	mmu04971	8	74	0.000266696	0.00756217
Bacterial invasion of epithelial cells	mmu05100	8	74	0.000266696	0.00756217
PI3K-Akt signaling pathway	mmu04151	19	358	0.00030589	0.0082441
Tight junction	mmu04530	12	167	0.000323725	0.00861724
Synaptic vesicle cycle	mmu04721	8	77	0.000341445	0.00896693
Cell cycle	mmu04110	10	123	0.000407167	0.0104819
Lysosome	mmu04142	10	124	0.000432131	0.0106166
RNA polymerase	mmu03020	5	30	0.000670962	0.0141677
Rap1 signaling pathway	mmu04015	13	214	0.000831234	0.0162631
Regulation of actin cytoskeleton	mmu04810	13	217	0.00093754	0.0175531
Fatty acid biosynthesis	mmu00061	4	19	0.00110263	0.0195231
One carbon pool by folate	mmu00670	4	19	0.00110263	0.0195231
Adherens junction	mmu04520	7	72	0.00113966	0.0198414
Hepatocellular carcinoma	mmu05225	11	171	0.00132573	0.0217053
Focal adhesion	mmu04510	12	199	0.00137709	0.0221751
Phosphatidylinositol signaling system	mmu04070	8	98	0.00147622	0.0231057
Phospholipase D signaling pathway	mmu04072	10	149	0.00161079	0.0241698
Gastric cancer	mmu05226	10	150	0.00168761	0.0251087
Ras signaling pathway	mmu04014	13	233	0.00171566	0.0252407
Adrenergic signaling in cardiomyocytes	mmu04261	10	152	0.00185012	0.0261355
Parathyroid hormone synthesis, secretion and action	mmu04928	8	107	0.00247117	0.0322322
Dopaminergic synapse	mmu04728	9	135	0.00282649	0.034348
PPAR signaling pathway	mmu03320	7	87	0.00310155	0.0366658
Huntington disease	mmu05016	11	194	0.00335617	0.0385123
Calcium signaling pathway	mmu04020	11	194	0.00335617	0.0385123
Cholinergic synapse	mmu04725	8	113	0.00338315	0.038685
Fc gamma R-mediated phagocytosis	mmu04666	7	92	0.00413709	0.0449679
Breast cancer	mmu05224	9	147	0.00479096	0.0490759
Arrhythmic in SSC.HU.Early, rhythmic in SSC.HU.Late
Pathway_Name	KEGG_ID	Input_number	Background_number	P-Value	Corrected P-Value
Metabolic pathways	mmu01100	134	1494	1.79006e-17	4.74084e-15
Endocytosis	mmu04144	38	270	1.64276e-10	1.65328e-08
Human papillomavirus infection	mmu05165	41	361	9.74777e-09	7.78584e-07
Autophagy - animal	mmu04140	22	130	6.61157e-08	4.35835e-06
Choline metabolism in cancer	mmu05231	19	99	9.17652e-08	5.8451e-06
mTOR signaling pathway	mmu04150	23	155	2.76945e-07	1.51477e-05
GnRH signaling pathway	mmu04912	17	90	5.23624e-07	2.74466e-05
TNF signaling pathway	mmu04668	18	113	2.17857e-06	0.000101944
Pathways in cancer	mmu05200	46	535	2.18799e-06	0.000101944
Signaling pathways regulating pluripotency of stem cells	mmu04550	20	138	2.24466e-06	0.000103065
Endocrine resistance	mmu01522	16	93	3.28872e-06	0.000143903
ErbB signaling pathway	mmu04012	15	84	4.42981e-06	0.000188905
Apoptosis	mmu04210	19	136	6.41764e-06	0.000257923
Thermogenesis	mmu04714	25	232	1.59991e-05	0.000591965
Prolactin signaling pathway	mmu04917	13	72	1.70923e-05	0.000623251
Oxidative phosphorylation	mmu00190	18	134	1.79494e-05	0.000645151
Inositol phosphate metabolism	mmu00562	13	73	1.94482e-05	0.000694065
Phosphatidylinositol signaling system	mmu04070	15	98	2.27851e-05	0.000796214
Gap junction	mmu04540	14	86	2.30602e-05	0.00080027
Synaptic vesicle cycle	mmu04721	13	77	3.19564e-05	0.00102423
Progesterone-mediated oocyte maturation	mmu04914	14	90	3.60927e-05	0.00114225
Renal cell carcinoma	mmu05211	12	68	4.35714e-05	0.0013369
Fc gamma R-mediated phagocytosis	mmu04666	14	92	4.47511e-05	0.00136357
Relaxin signaling pathway	mmu04926	17	131	4.49827e-05	0.00136357
Acute myeloid leukemia	mmu05221	12	69	4.94132e-05	0.00145935
Hepatitis C	mmu05160	19	160	4.95923e-05	0.00145935
Breast cancer	mmu05224	18	147	5.41223e-05	0.00158339
Long-term depression	mmu04730	11	61	7.57383e-05	0.00210561
cAMP signaling pathway	mmu04024	22	213	8.90171e-05	0.00239537
Hippo signaling pathway	mmu04390	18	154	9.30223e-05	0.00247666
MAPK signaling pathway	mmu04010	27	294	9.57292e-05	0.00253531
Focal adhesion	mmu04510	21	199	9.6749e-05	0.00254891
Viral carcinogenesis	mmu05203	23	231	0.000103243	0.00265783
Autophagy - other	mmu04136	8	32	0.000103525	0.00265783
Colorectal cancer	mmu05210	13	88	0.000108363	0.00273066
Hepatocellular carcinoma	mmu05225	19	171	0.000110771	0.00273066
Osteoclast differentiation	mmu04380	16	128	0.000110834	0.00273066
Ras signaling pathway	mmu04014	23	233	0.000116115	0.00279564
Parkinson disease	mmu05012	17	144	0.000129066	0.00299291
Measles	mmu05162	17	144	0.000129066	0.00299291
T cell receptor signaling pathway	mmu04660	14	103	0.000132738	0.00306392
Alzheimer disease	mmu05010	19	175	0.000145755	0.00331873
Proteoglycans in cancer	mmu05205	21	206	0.000150365	0.00340827
FoxO signaling pathway	mmu04068	16	132	0.000153023	0.00345297
Central carbon metabolism in cancer	mmu05230	11	67	0.000158723	0.00351848
Estrogen signaling pathway	mmu04915	16	134	0.000178927	0.00390902
Dopaminergic synapse	mmu04728	16	135	0.000193252	0.00411825
Carbon metabolism	mmu01200	15	121	0.000194782	0.00411825
Neurotrophin signaling pathway	mmu04722	15	121	0.000194782	0.00411825
Legionellosis	mmu05134	10	58	0.00022006	0.00443365
Collecting duct acid secretion	mmu04966	7	27	0.000231967	0.00461367
Tight junction	mmu04530	18	167	0.000233585	0.00462756
B cell receptor signaling pathway	mmu04662	12	83	0.000235751	0.00465215
Human T-cell leukemia virus 1 infection	mmu05166	23	246	0.000240407	0.0047255
Rap1 signaling pathway	mmu04015	21	214	0.000242385	0.00474585
Sphingolipid signaling pathway	mmu04071	15	124	0.000247778	0.00479546
Apelin signaling pathway	mmu04371	16	139	0.000260977	0.00496184
Chemokine signaling pathway	mmu04062	20	200	0.000269072	0.00503335
Kaposi sarcoma-associated herpesvirus infection	mmu05167	21	217	0.000287923	0.00528769
Cholinergic synapse	mmu04725	14	113	0.000315914	0.00573891
Melanogenesis	mmu04916	13	100	0.000336654	0.00601447
Fluid shear stress and atherosclerosis	mmu05418	16	143	0.00034834	0.00615034
Longevity regulating pathway - multiple species	mmu04213	10	62	0.000354358	0.00623472
PD-L1 expression and PD-1 checkpoint pathway in cancer	mmu05235	12	88	0.000381552	0.00664349
PI3K-Akt signaling pathway	mmu04151	29	358	0.000387203	0.00671863
Human immunodeficiency virus 1 infection	mmu05170	22	239	0.000394965	0.00680639
Mitophagy - animal	mmu04137	10	63	0.000396928	0.00681686
Chagas disease (American trypanosomiasis)	mmu05142	13	103	0.000435035	0.00729698
Hepatitis B	mmu05161	17	163	0.000485824	0.0079891
Oocyte meiosis	mmu04114	14	119	0.000507013	0.00825659
Phospholipase D signaling pathway	mmu04072	16	149	0.000526218	0.0084329
Retrograde endocannabinoid signaling	mmu04723	16	150	0.000562384	0.00880658
Non-alcoholic fatty liver disease (NAFLD)	mmu04932	16	151	0.000600656	0.00930001
Glycolysis / Gluconeogenesis	mmu00010	10	67	0.00061207	0.00944765
EGFR tyrosine kinase inhibitor resistance	mmu01521	11	80	0.000619552	0.00953389
RNA transport	mmu03013	17	167	0.000624541	0.00958137
RIG-I-like receptor signaling pathway	mmu04622	10	68	0.000678738	0.0102121
Fc epsilon RI signaling pathway	mmu04664	10	68	0.000678738	0.0102121
Yersinia infection	mmu05135	14	123	0.000682892	0.0102121
Regulation of actin cytoskeleton	mmu04810	20	217	0.000698995	0.0104063
Ubiquitin mediated proteolysis	mmu04120	15	139	0.000740082	0.0109855
Insulin resistance	mmu04931	13	110	0.000762871	0.0112245
Insulin signaling pathway	mmu04910	15	140	0.000791414	0.0115098
Prostate cancer	mmu05215	12	97	0.000836057	0.0120546
Endometrial cancer	mmu05213	9	58	0.000884999	0.0126515
VEGF signaling pathway	mmu04370	9	58	0.000884999	0.0126515
C-type lectin receptor signaling pathway	mmu04625	13	112	0.000887867	0.0126565
Circadian entrainment	mmu04713	12	99	0.000982573	0.0133992
Toll-like receptor signaling pathway	mmu04620	12	99	0.000982573	0.0133992
HIF-1 signaling pathway	mmu04066	13	114	0.00102958	0.0139271
Huntington disease	mmu05016	18	194	0.00117654	0.0153775
Pancreatic cancer	mmu05212	10	75	0.00133266	0.0169342
Glioma	mmu05214	10	75	0.00133266	0.0169342
Influenza A	mmu05164	16	164	0.00133936	0.0169765
Pyruvate metabolism	mmu00620	7	38	0.00136546	0.017092
Alanine, aspartate and glutamate metabolism	mmu00250	7	38	0.00136546	0.017092
Jak-STAT signaling pathway	mmu04630	16	165	0.00141904	0.0175552
Chronic myeloid leukemia	mmu05220	10	76	0.00145804	0.0177858
GABAergic synapse	mmu04727	11	90	0.00148097	0.0177858
Gastric cancer	mmu05226	15	150	0.00149308	0.0178885
Adrenergic signaling in cardiomyocytes	mmu04261	15	152	0.00168272	0.0198766
Biosynthesis of amino acids	mmu01230	10	78	0.00173753	0.0203331
Parathyroid hormone synthesis, secretion and action	mmu04928	12	107	0.0017987	0.0206174
Cellular senescence	mmu04218	17	186	0.00184039	0.0209522
Oxytocin signaling pathway	mmu04921	15	154	0.00189207	0.0214022
Cell cycle	mmu04110	13	123	0.00192244	0.0216899
Human cytomegalovirus infection	mmu05163	21	256	0.0020072	0.0223198
TGF-beta signaling pathway	mmu04350	11	95	0.00218636	0.0238649
AMPK signaling pathway	mmu04152	13	126	0.00233402	0.025312
mRNA surveillance pathway	mmu03015	11	96	0.00235572	0.0254925
Cushing syndrome	mmu04934	15	159	0.00251198	0.0265215
Tuberculosis	mmu05152	16	178	0.00287355	0.0285505
Glutamatergic synapse	mmu04724	12	114	0.00290751	0.0288003
Protein processing in endoplasmic reticulum	mmu04141	15	163	0.00312118	0.0306753
Axon guidance	mmu04360	16	180	0.00318044	0.0311362
AGE-RAGE signaling pathway in diabetic complications	mmu04933	11	101	0.00336896	0.0324763
Adherens junction	mmu04520	9	72	0.00338501	0.0325065
Glycosaminoglycan biosynthesis - keratan sulfate	mmu00533	4	14	0.00400214	0.0361558
Type II diabetes mellitus	mmu04930	7	48	0.0044127	0.0387517
Vascular smooth muscle contraction	mmu04270	13	140	0.00531761	0.043938
Arginine and proline metabolism	mmu00330	7	50	0.00538902	0.0442628
Salmonella infection	mmu05132	9	78	0.00545342	0.0446205
NF-kappa B signaling pathway	mmu04064	11	109	0.0056886	0.046068
Ribosome	mmu03010	15	175	0.00571242	0.046068
Epstein-Barr virus infection	mmu05169	18	230	0.00630168	0.0487097
Butanoate metabolism	mmu00650	5	27	0.00647217	0.0493454
Aminoacyl-tRNA biosynthesis	mmu00970	8	66	0.0065951	0.0498297
Non-small cell lung cancer	mmu05223	8	66	0.0065951	0.0498297
Rhythmic in AR.Ctrl.Early, arrhythmic in AR.Ctrl.Late
Pathway_Name	KEGG_ID	Input_number	Background_number	P-Value	Corrected P-Value
Hepatocellular carcinoma	mmu05225	7	171	0.000689382	0.0322169
Ras signaling pathway	mmu04014	8	233	0.000883179	0.037413
Arrhythmic in AR.Ctrl.Early, rhythmic in AR.Ctrl.Late
Pathway_Name	KEGG_ID	Input_number	Background_number	P-Value	Corrected P-Value
Metabolic pathways	mmu01100	71	1494	2.03611e-10	4.03863e-08
Pathways in cancer	mmu05200	34	535	2.3769e-08	3.14306e-06
Huntington disease	mmu05016	16	194	6.2741e-06	0.000429127
Retrograde endocannabinoid signaling	mmu04723	14	150	6.44795e-06	0.000430172
PI3K-Akt signaling pathway	mmu04151	22	358	1.13661e-05	0.000672977
Human cytomegalovirus infection	mmu05163	18	256	1.32101e-05	0.000748634
Rap1 signaling pathway	mmu04015	16	214	1.95745e-05	0.00103536
Phospholipase D signaling pathway	mmu04072	13	149	2.64475e-05	0.00126406
Alzheimer disease	mmu05010	14	175	3.20786e-05	0.00151495
GABAergic synapse	mmu04727	10	90	3.45806e-05	0.00159513
Glutamatergic synapse	mmu04724	11	114	4.69739e-05	0.0020255
Ras signaling pathway	mmu04014	16	233	5.11602e-05	0.00213634
Choline metabolism in cancer	mmu05231	10	99	7.24641e-05	0.00286086
Regulation of actin cytoskeleton	mmu04810	15	217	8.11171e-05	0.00306047
Lysosome	mmu04142	11	124	9.46342e-05	0.00347605
Human papillomavirus infection	mmu05165	20	361	0.000108262	0.0038346
GnRH signaling pathway	mmu04912	9	90	0.000176948	0.0057537
Dopaminergic synapse	mmu04728	11	135	0.000189739	0.00592671
Morphine addiction	mmu05032	9	92	0.000206028	0.00619176
MAPK signaling pathway	mmu04010	17	294	0.0002163	0.00637502
Gastric cancer	mmu05226	11	150	0.000440683	0.0113519
Proteoglycans in cancer	mmu05205	13	206	0.000537602	0.0128474
Hippo signaling pathway	mmu04390	11	154	0.0005419	0.0128726
mTOR signaling pathway	mmu04150	11	155	0.000570029	0.0134602
Th1 and Th2 cell differentiation	mmu04658	8	87	0.000672175	0.0149804
Kaposi sarcoma-associated herpesvirus infection	mmu05167	13	217	0.000847591	0.0176041
Hypertrophic cardiomyopathy (HCM)	mmu05410	8	91	0.000882823	0.0180524
Amyotrophic lateral sclerosis (ALS)	mmu05014	6	52	0.00107763	0.0213748
Dilated cardiomyopathy (DCM)	mmu05414	8	95	0.00114337	0.022566
Parkinson disease	mmu05012	10	144	0.00116728	0.0229001
Breast cancer	mmu05224	10	147	0.00135	0.0246795
Arrhythmogenic right ventricular cardiomyopathy (ARVC)	mmu05412	7	77	0.00153243	0.0261443
Synaptic vesicle cycle	mmu04721	7	77	0.00153243	0.0261443
Inflammatory mediator regulation of TRP channels	mmu04750	9	127	0.0017792	0.0283458
Legionellosis	mmu05134	6	58	0.00180372	0.0285074
Human immunodeficiency virus 1 infection	mmu05170	13	239	0.00192472	0.0299426
Relaxin signaling pathway	mmu04926	9	131	0.00216973	0.0327274
Serotonergic synapse	mmu04726	9	132	0.00227729	0.0334593
Human T-cell leukemia virus 1 infection	mmu05166	13	246	0.002443	0.0356146
Synthesis and degradation of ketone bodies	mmu00072	3	11	0.0024958	0.0356146
Oxidative phosphorylation	mmu00190	9	134	0.00250511	0.0356193
Purine metabolism	mmu00230	9	136	0.00275064	0.0381531
C-type lectin receptor signaling pathway	mmu04625	8	112	0.00300595	0.0406983
PD-L1 expression and PD-1 checkpoint pathway in cancer	mmu05235	7	88	0.00309567	0.0413486
Apelin signaling pathway	mmu04371	9	139	0.0031542	0.0418304
Insulin signaling pathway	mmu04910	9	140	0.00329861	0.0426489
Fluid shear stress and atherosclerosis	mmu05418	9	143	0.00376323	0.0463625
Cell adhesion molecules (CAMs)	mmu04514	10	171	0.0038068	0.0466098
Epstein-Barr virus infection	mmu05169	12	230	0.00388095	0.0470817
cGMP-PKG signaling pathway	mmu04022	10	173	0.00411301	0.0489979
Rhythmic in AR.HU.Early, arrhythmic in AR.HU.Late
Pathway_Name	KEGG_ID	Input_number	Background_number	P-Value	Corrected P-Value
Metabolic pathways	mmu01100	37	1494	2.06242e-05	0.00212811
Herpes simplex virus 1 infection	mmu05168	17	439	2.62291e-05	0.00251981
Calcium signaling pathway	mmu04020	10	194	0.000138136	0.0101275
Dilated cardiomyopathy (DCM)	mmu05414	7	95	0.000182434	0.0123966
Purine metabolism	mmu00230	8	136	0.000275644	0.0170654
Signaling pathways regulating pluripotency of stem cells	mmu04550	8	138	0.00030259	0.0183264
Viral myocarditis	mmu05416	6	89	0.000817702	0.0340018
Hypertrophic cardiomyopathy (HCM)	mmu05410	6	91	0.000912061	0.0352917
Arrhythmic in AR.HU.Early, rhythmic in AR.HU.Late
Pathway_Name	KEGG_ID	Input_number	Background_number	P-Value	Corrected P-Value
Jak-STAT signaling pathway	mmu04630	13	165	1.06381e-06	0.00019767
Circadian rhythm	mmu04710	5	30	0.000103104	0.00795705
Metabolic pathways	mmu01100	37	1494	0.000547076	0.0246433
Human T-cell leukemia virus 1 infection	mmu05166	11	246	0.000828565	0.0332882
Toxoplasmosis	mmu05145	7	108	0.000992453	0.0364267
