# Supplementary material for: Simulated Space Environmental Factors of Weightlessness, Noise and Low Air Pressure Differentially Affect the Circadian Rhythm and Gut Microbiome
Source: Research Square preprint supplement (doi:10.21203/rs.3.rs-362076/v1), 2021-04-05
Supplement: Supplementary file 2 [file 76998a839a2e065a2ab66abf.xlsx]

## Sheet: Sheet1
Supplementary Table S1. DEGs showing different expression rhythms between the indicated conditions in hypothalamus
Genes shown below with p < 0.05 (T-test double-tailed paired test) and log2(FoldChange) > 1 or < -1
SSC_Ctrl (Early vs Late)(22 vs 151)
			Rhythmic in SSC_Ctrl_Early						Arrhythmic in SSC_Ctrl_Late
Gene	p-value	log2FoldChange	ZT0	ZT4	ZT8	ZT12	ZT16	ZT20	ZT0	ZT4	ZT8	ZT12	ZT16	ZT20
Lgals7	0.000808009	1.45383	0.801186	0.838241	0.723678	0.654675	1.14295	0.805859	0.180647	0.328928	0.466094	0.184618	0.343364	0.309409
Ccdc68	0.00532179	1.68323	0.197003	0.087902	0.220765	0.137304	0.063923	0.146477	0.050516	0	0.048877	0.077439	0.024004	0.064892
Gzmk	0.00740172	2.03167	0.645329	0.262233	0.943993	0.327691	0.839072	0.430256	0.040187	0	0.213857	0.205352	0.229156	0.154872
A730009L09Rik	0.0100157	1.19484	0.163123	0.048334	0.133529	0.265753	0.112476	0.178431	0.111107	0	0.043001	0.136258	0.084474	0.01903
Zfp459	0.0134146	1.00068	0.205019	0.267289	0.711982	0.263158	0.282727	0.265788	0.093095	0.15256	0.360298	0.180769	0.03539	0.175397
Slc26a3	0.0163489	1.02082	0.172197	0.178113	0.242305	0.204026	0.215876	0.136986	0.153539	0.062126	0.049519	0.087174	0.097279	0.116879
Gm8773	0.0173003	1.16137	2.44389	1.47459	0.721447	1.57943	1.94969	2.19946	1.1886	1.20235	0.724091	0.494886	0.46021	0.565501
Cdc25c	0.0224956	1.97902	0	0.07906	0.113463	0.141136	0.065707	0.115819	0.025963	0	0.02512	0.0796	0	0
Aqp7	0.0233544	1.61376	0.054336	0.085866	0.150956	0.171679	0.049954	0.01761	0	0	0.038196	0.080689	0.037517	0.016904
Tmco5b	0.0241911	2.07695	0.167662	0.178842	0.249535	0.148989	0	0.081509	0	0	0.088394	0.046683	0.021706	0.039119
Espnl	0.0308719	1.70115	0	0.017839	0.044802	0.055729	0.064862	0.091464	0	0.018666	0	0.020954	0.009743	0.035117
mt-Co2	0.033082	1.10383	32771.7	27370.4	41706.7	14549.7	54628	7914.1	12880.2	17131.6	20256.7	10550.8	16673.3	5764.54
Mst1	0.0336062	1.13121	0.04956	0	0.088514	0.088082	0.034173	0.024094	0	0	0.065323	0.041398	0	0.023127
Tescl	0.0343894	1.59598	0.299536	0.454415	0.641961	0.141961	0.247841	0.058248	0.065287	0	0.31584	0.166804	0.062046	0
Mmp25	0.0376437	1.92887	0.024147	0.045791	0.103503	0.131608	0.01332	0.117391	0.031578	0.009583	0.020369	0.048409	0	0.004507
Rnf183	0.0393895	1.53625	0.436922	0.286805	0.640276	0.318574	0.139045	0.22875	0.183137	0.100038	0.035439	0.224594	0.069619	0.094102
Foxn4	0.0395913	1.25652	0.03339	0.01583	0.178904	0.098905	0	0.032466	0	0	0.123227	0.018594	0.008646	0
Pjvk	0.0440242	1.28178	0.375518	0.249237	0.134134	0.244711	0.466064	0.219071	0.286467	0	0.138585	0.12547	0.038893	0.10514
T	0.0443777	1.0439	0.331883	0.041957	0.13172	0.235938	0.152559	0.129077	0.15673	0.087809	0.06999	0.073927	0.045831	0.061949
Crisp1	0.0456359	2.34177	0.072346	0	0.215347	0.128577	0	0.070342	0.01971	0	0.076283	0	0	0
Prlh	0.0459875	1.32238	8.62957	2.11155	2.87254	2.52868	6.90991	2.79686	2.93257	1.19683	1.56547	2.17026	1.34546	1.12581
Serpinb11	0.0489413	2.03011	0.046862	0.122192	0	0.027762	0.161561	0.045565	0	0	0	0.026096	0.072804	0
			Arrhythmic in SSC_Ctrl_Early						Rhythmic in SSC_Ctrl_Late
Gene	p-value	log2FoldChange	ZT0	ZT4	ZT8	ZT12	ZT16	ZT20	ZT0	ZT4	ZT8	ZT12	ZT16	ZT20
Gm4841	0.000278745	-4.07586	0	0.017107	0	0	0	0	0.058986	0.053701	0.057071	0.040188	0.028029	0.050515
Rimbp3	0.000512031	-1.04891	0.061884	0.225677	0	0.129724	0.026258	0.305478	0.191946	0.311718	0.130504	0.323407	0.19228	0.399845
4930404N11Rik	0.000759955	-1.51737	0.179093	0.084905	0.319858	0.106099	0	0.043533	0.39035	0.266535	0.472104	0.349063	0.370977	0.250719
Slc2a10	0.00108434	-1.27379	0.200865	0.340095	0.187913	0.526986	0	0.641708	0.883427	0.676169	0.544625	0.854903	0.631544	0.997584
Lmx1a	0.00114666	-1.48151	0.271488	0.557732	0.359166	0.464634	0.166395	0.945888	1.01909	0.912834	1.17687	1.72182	1.19502	1.69621
Rspo2	0.00124831	-1.39164	0.152943	0.304532	0.127472	0.326184	0.063274	0.468428	0.675041	0.493172	0.580565	0.604707	0.625698	0.806482
Ncapg	0.00173225	-1.45466	0.06983	0.008276	0	0	0	0.033948	0.095126	0.034642	0.055224	0.038887	0.018081	0.065172
Gm3558	0.00194186	-1.01222	0.722822	1.45342	0.267093	1.12222	0.928046	1.2602	1.50755	1.97837	1.98426	2.06812	1.96193	2.10522
Nlrc5	0.00270111	-1.1828	0.125911	0.161169	0.12743	0.134266	0.060772	0.110182	0.23327	0.296697	0.325273	0.301501	0.309717	0.167454
Tcte1	0.00275483	-1.10643	0.523997	0.155261	0.025996	0.258689	0	0.583784	0.916058	0.281608	0.379856	0.389066	0.418337	0.947515
Abca8a	0.00286302	-1.00783	1.01265	0.720121	0.549382	1.05469	0.337857	1.38957	1.32163	1.38959	1.45097	1.85548	1.81851	2.3475
Lipo2	0.00294728	-1.18474	0.155013	0.041994	0	0.052476	0	0.172251	0.217199	0.142813	0.11675	0.147981	0.137613	0.19634
Foxb2	0.00297895	-1.59859	0.155005	0.391921	0	0.244876	0.190006	1.49038	1.38893	0.786044	0.780892	1.57291	0.98108	1.97708
Neurog2	0.00325353	-1.12029	0.310498	0.22898	0.095847	0.218009	0	0.503165	0.476238	0.467803	0.41228	0.563552	0.095285	0.933749
Sypl2	0.00385625	-1.23211	0.087664	0.172176	0.089466	0.192897	0.120891	0.255708	0.39579	0.372759	0.415959	0.258036	0.324264	0.391546
Fam83g	0.00406413	-3.10977	0.016349	0	0.009733	0	0	0.007948	0.05345	0.00811	0.056026	0.054625	0.071963	0.049589
Fcer2a	0.00440179	-4.20808	0	0.020587	0	0	0	0	0.106482	0.064628	0.022895	0.060457	0.044976	0.081058
Sp5	0.00558288	-1.35701	0.268299	0.312207	0.087123	0.231194	0.30272	0.284584	0.318972	0.774391	0.552946	0.461808	0.833638	0.865019
4930415O20Rik	0.00589843	-2.0013	0	0	0.218589	0.108761	0.126585	0	0.400144	0.182148	0.532343	0.255586	0.190142	0.257009
Cxcl5	0.00591341	-2.2692	0	0.030835	0	0.077065	0	0.094861	0.070883	0.129065	0.137165	0.144881	0.252617	0.242812
Ern2	0.00609583	-1.35498	0.051843	0.204814	0.020576	0.389028	0	0.386454	0.593229	0.445784	0.35532	0.577397	0.196878	0.524163
C1rb	0.00667706	-2.23252	0	0.019994	0.012554	0.012492	0	0.030755	0.022981	0.052305	0.100057	0.070457	0.02184	0.088562
Nos2	0.00732802	-1.59966	0.028847	0.049233	0.054955	0.027343	0	0.084144	0.075449	0.103036	0.109502	0.083533	0.14341	0.226149
Onecut3	0.00827624	-1.11624	0.091159	0.132193	0.140463	0.324027	0.029579	0.568303	0.432442	0.202171	0.254438	0.519585	0.377657	1.00091
Hist1h2br	0.00913321	-1.34326	0.243136	0.230533	0.027571	0.219488	0	0.213888	0.340674	0.367591	0.488324	0.361056	0.251818	0.561888
Tcte3	0.0096075	-1.7164	0.096825	0.183613	0.057643	0.229446	0	0.094144	0.58036	0.336234	0.357335	0.323517	0.35099	0.225915
Mip	0.0103818	-1.64631	0.059726	0.079282	0	0.099072	0	0.069686	0.247337	0.165922	0.125953	0.17295	0.173203	0.078038
Lrp2	0.0104623	-1.00401	0.042937	0.130858	0.071207	0.285255	0.095161	0.247505	0.320863	0.279947	0.282963	0.33133	0.235056	0.300544
Aldoa	0.0105004	-1.2972	0.576954	0.273523	0.076328	0.341799	0	0.560975	1.08287	0.636038	0.57456	0.96387	0.730346	0.50855
Ccbe1	0.0105253	-1.06869	0.06803	0.105552	0.121501	0.278454	0.034115	0.207459	0.333626	0.217833	0.27063	0.303074	0.278636	0.305916
Cldn4	0.0105547	-2.0069	0	0.053486	0	0.050128	0	0	0.061476	0.111937	0.02974	0.125654	0.087637	0
Bnc2	0.0107005	-1.16041	0.094408	0.056964	0.020438	0.081352	0.071013	0.100138	0.084179	0.131987	0.171944	0.191176	0.168891	0.20025
Slc24a5	0.0108236	-1.09864	0.156844	0.339917	0.053356	0.557505	0	0.501071	0.341855	0.444614	0.378013	0.898375	0.232063	1.15013
Aqp2	0.0108496	-2.34401	0	0.017113	0	0	0.099555	0.070193	0.078675	0.268602	0.095153	0.18091	0.224312	0.101065
Erfl	0.0109536	-1.0865	0.355699	0.52697	0.291167	1.05362	0.306574	2.42094	2.03511	0.992567	0.93765	2.37695	1.5657	2.61426
Ces5a	0.0110612	-1.1432	0.125805	0.170406	0.064196	0.33006	0.309801	0.279591	0.372134	0.650845	0.331632	0.430353	0.698022	0.343851
Tgtp1	0.0114601	-1.03952	0.369297	0.399013	0.572641	0.335801	0.2724	0.400822	0.617727	0.979919	0.778797	1.20521	0.551489	0.697337
Pappa	0.0116964	-1.02182	0.088255	0.037436	0.027653	0.082554	0.070462	0.081295	0.177174	0.082955	0.078366	0.126748	0.098623	0.22326
Mctp2	0.0117033	-1.5872	0.008567	0.069043	0.051	0.025376	0	0.183249	0.079356	0.161493	0.144529	0.276695	0.115345	0.23586
Pax2	0.0119475	-1.29161	0.00947	0.035915	0	0.072929	0	0.027622	0.067079	0.06107	0.01997	0.0791	0.06375	0.066284
Fasl	0.0120878	-1.61618	0.211546	0.125363	0.094455	0.187987	0	0.115699	0.345813	0.209889	0.6413	0.412316	0.273875	0.370188
Hgd	0.0123068	-1.1265	0.029624	0.070222	0.035273	0.175501	0	0	0.032285	0.176354	0.124948	0.230959	0.030682	0.082944
Dnaaf4	0.0125219	-1.01822	0.372665	0.863737	0.049302	1.15293	0.285508	0.96625	0.834819	1.29411	1.288	1.93692	0.343086	1.77766
Arg1	0.0125494	-1.06673	0.069358	0.131525	0.165163	0.082178	0	0.202311	0.094482	0.206443	0.292532	0.308988	0.071834	0.388385
Prss57	0.0126576	-1.53337	0.12152	0.05761	0.144689	0.179977	0	0.059077	0.231756	0.271278	0.192202	0.372192	0.377578	0.184296
Rhbdl2	0.0133598	-1.40465	0.141816	0.229381	0.03973	0.21745	0	0.194666	0.309101	0.397285	0.272682	0.36235	0.518401	0.31921
Frmd7	0.0137703	-1.70128	0.059781	0.113365	0	0.141663	0	0.162752	0.221508	0.118626	0.151285	0.279641	0.34673	0.435187
Slc38a11	0.013785	-1.39295	0.023719	0.033734	0.042361	0.091335	0.049063	0.092247	0.122781	0.21768	0.131301	0.1585	0.049131	0.193694
Sstr1	0.0143896	-1.00967	1.0139	0.462869	0.149038	0.726718	0	2.60451	1.03674	1.10531	0.963497	1.40805	1.17975	4.28738
Ifi206	0.0143954	-1.64687	0	0.031805	0.059908	0	0	0.016307	0.054833	0.099842	0.088423	0.056038	0	0.039132
Scube2	0.0146534	-1.02123	0.166501	0.175411	0.183561	0.131518	0.08504	0.239837	0.369625	0.312038	0.22108	0.357144	0.427923	0.305032
Gpc6	0.014781	-1.35518	0.398632	0.298396	0.049961	0.240301	0.048221	0.326393	0.823125	0.437141	0.302342	0.443974	0.35492	1.12264
Galr2	0.0148002	-1.01055	0.145987	0.118646	0.111742	0.296523	0	0.588054	0.147732	0.475915	0.186919	0.534233	0.2808	0.91481
Pebp4	0.0149419	-4.99503	0	0.022505	0	0	0	0.023078	0.362132	0.047099	0.450489	0.26435	0.196662	0.132911
Hist1h2bq	0.0156871	-1.05168	0.088969	0.301275	0.151331	0.301183	0.105163	0.321304	0.24932	0.378308	0.536066	0.339733	0.487057	0.640545
Tg	0.0159444	-3.21354	0	0	0	0.006919	0.004027	0.005678	0	0.011588	0.036946	0.04878	0.024193	0.032701
Dennd2c	0.016118	-1.27074	0.047825	0.090692	0.034166	0.067998	0.026381	0.167402	0.119875	0.113881	0.110942	0.287631	0.099066	0.316906
Kcnh5	0.0162393	-1.02795	0.100977	0.089759	0.030057	0.216851	0.121844	0.269997	0.412667	0.187849	0.186329	0.224926	0.261457	0.418194
Fam169b	0.0162858	-2.24201	0.05223	0.016508	0	0.041257	0	0	0.075894	0.120916	0.036716	0.077562	0.144255	0.064995
Car1	0.0165001	-1.11504	0.020521	0.214031	0.097734	0.097257	0	0	0.134183	0.285045	0.173105	0.091421	0.170031	0.076608
Gvin1	0.0172035	-1.05504	0.091008	0.196851	0.115132	0.198813	0.05883	0.287586	0.220057	0.2596	0.263896	0.566984	0.309285	0.350366
Lrch3	0.0173014	-1.04835	0.566675	0.641553	0.322253	0.901908	0	1.68584	1.84346	0.830767	0.552929	1.58254	0.61319	3.09429
Fam205a1	0.0177523	-1.02977	0.327387	0.585692	0.272129	0.570875	0.093702	0.720725	1.19826	1.04188	0.722981	0.825569	0.767723	0.691804
Ccr2	0.0190171	-1.01797	0.030308	0.064658	0.10826	0.089776	0.104489	0.147344	0.173405	0.218012	0.199736	0.22785	0.086323	0.198003
Slc4a9	0.0193976	-1.11098	0.028322	0.006714	0.016861	0.058725	0	0.12392	0.108029	0.070251	0.059728	0.063087	0.073334	0.132164
Gmnc	0.0194541	-1.12977	0	0.012691	0.058436	0.042292	0	0.091101	0.053486	0.008854	0.141138	0.0646	0.046211	0.133251
Pcdh12	0.0198515	-1.34051	0.050387	0.09555	0.005454	0.010855	0	0.07126	0.099839	0.204514	0.05796	0.112237	0.05693	0.059851
L3mbtl4	0.0204471	-1.23397	0.042586	0.070663	0.012676	0.119838	0	0.139748	0.145032	0.163729	0.179617	0.177864	0.121294	0.119236
Gm826	0.0221626	-2.28059	0.068614	0	0	0	0	0.066714	0.224327	0.085096	0.036175	0.03821	0.177661	0.096056
Piwil4	0.0225951	-2.72691	0	0	0	0.023097	0	0.009477	0	0.009671	0.025694	0.065134	0.060571	0.054581
Pcdha2	0.0234468	-1.72112	0	0.038837	0.073154	0.048531	0	0.298693	0.401744	0.172717	0.129569	0.182477	0.063634	0.563858
8030474K03Rik	0.0236705	-3.9275	0	0.012117	0	0	0	0	0	0.063397	0.02695	0.056933	0.013236	0.023854
Gm4787	0.0240916	-1.04241	0.310554	0.186489	0	0.183979	0	0.261693	0.270752	0.338933	0.349288	0.415054	0.171543	0.39611
Ciita	0.0242624	-1.05557	0.050026	0.053013	0.014015	0.055786	0.040581	0.028612	0.118657	0.078831	0.052749	0.065548	0.060956	0.126334
Sik2	0.0243682	-1.08044	0.283422	0.294857	0.196851	0.321818	0.108568	0.67745	1.0596	0.410086	0.340356	0.653241	0.273158	1.24542
Nkg7	0.0246358	-1.83562	0.232557	0.055126	0	0.172214	0	0	0.506879	0.403787	0.367823	0.194257	0.060215	0.108521
C6	0.0254991	-3.89256	0	0	0	0	0	0.014005	0.047092	0	0.045564	0.048127	0	0.067216
Tlr1	0.0258061	-1.23853	0.183696	0.152402	0.036453	0.172307	0	0.052094	0.208533	0.48602	0.161413	0.281313	0.142692	0.128581
Adrb3	0.0258681	-1.32214	0.211989	0.239287	0.168271	0.394702	0	0.363161	0.451049	0.170266	0.53221	0.708307	0.470484	1.11171
Gm4070	0.0261211	-1.28525	0.085407	0.181507	0.105197	0.181451	0.117779	0.355075	0.256762	0.359406	0.319853	0.813455	0.295873	0.456268
Olfm5	0.0266617	-3.29588	0	0	0	0	0	0.043917	0.024612	0.022407	0.023813	0.100612	0.070172	0.189697
Edar	0.0268557	-1.52957	0.014083	0.053413	0.033537	0.008343	0	0.123239	0.076739	0.174661	0.044549	0.070583	0.160447	0.144581
C130050O18Rik	0.0269466	-1.75419	0.03634	0.04307	0.129804	0.021528	0	0.0265	0.099007	0.07211	0.277803	0.080946	0.244642	0.093267
Tecrl	0.027256	-1.36436	0	0.020666	0	0.064562	0.120229	0.063577	0.023753	0.151377	0	0.133514	0.180595	0.20342
Ccdc154	0.0272571	-1.05524	0.068035	0	0	0.023032	0	0	0.10592	0.009643	0.010248	0.043299	0.020133	0
Gal3st2b	0.027601	-1.8423	0.018639	0.008837	0	0	0	0	0.020313	0.018493	0.019654	0.020759	0.019305	0
Ephx3	0.0280058	-2.23236	0.020472	0.058232	0	0.097024	0	0.03981	0.267722	0.142181	0.269827	0.228005	0	0.105084
Tlr9	0.0282254	-2.39193	0	0.041891	0.017535	0.069797	0	0.035798	0.200618	0.248399	0.046586	0.049207	0.122023	0.199296
Cldn15	0.0285647	-1.95543	0.072346	0.114326	0	0.128577	0.066511	0.023447	0.157684	0.550305	0.22885	0.107433	0.324692	0.202558
Arl9	0.03129	-3.14886	0	0	0	0.09058	0	0	0.083314	0.22755	0.08061	0.340578	0	0.071349
Kbtbd6	0.031355	-1.28372	0.025748	0.122065	0.204378	0.081352	0	0.200277	0.336716	0.238429	0.162895	0.267646	0.08889	0.44856
Hbb-y	0.0314251	-1.65848	0	0	0	0.191748	0	0.314705	0.176367	0	0.426609	0.450607	0.167613	0.377596
Ppargc1b	0.0319205	-1.21188	0.314513	0.231265	0.298053	0.342228	0.566493	0.374452	1.46895	0.496731	0.358704	0.864996	0.791092	0.946489
Aqp6	0.0321378	-1.0175	0.126836	0.060131	0.02517	0.200374	0.058303	0.154154	0.253413	0.230711	0.17832	0.129491	0.197048	0.276208
Tmem95	0.032174	-2.34493	0.085869	0	0	0	0	0.146108	0.093579	0.255588	0.271628	0.215181	0.222337	0.12021
Lrit3	0.0323826	-1.09435	0	0	0	0	0	0.081111	0	0.031038	0	0.023228	0.0216	0.09732
Sptlc3	0.0325343	-1.53588	0.054011	0.136564	0.085745	0.213316	0.024828	0.192557	0.431649	0.19649	0.161362	0.340877	0.550076	0.369659
Zfp648	0.0328909	-2.61968	0	0.051338	0	0.032076	0	0.052645	0.08851	0	0.171275	0.241213	0.196273	0.138964
Hspa1a	0.033404	-1.36561	3.38913	2.7284	2.15724	3.52311	2.88065	12.3728	8.04896	7.21158	4.70862	6.23171	20.7187	22.7878
Apol11b	0.0335977	-2.73958	0	0	0	0.02464	0	0	0	0.041266	0.043856	0.057904	0.021539	0
Olfr1511	0.0341755	-1.48774	0	0	0	0.041341	0	0.084813	0.057037	0	0.036791	0.097151	0	0.162819
Slc39a4	0.0342175	-1.00774	0.236741	0.280587	0.201341	0.270483	0.069958	0.64945	0.386999	0.35233	0.472509	0.678008	0.788127	0.757536
Dhh	0.034349	-2.43105	0	0.014753	0	0.046088	0	0.045385	0.152606	0.046312	0.147654	0.07798	0.104746	0.043563
Gm10358	0.0357739	-1.57295	0.081953	0.038852	0	0.048551	0	0.278892	0.089312	0.3659	0.086414	0.273825	0.212199	0.305943
Slfn8	0.0364967	-1.05109	0.319268	0.213684	0.163982	0.029669	0.189924	0.079128	0.211491	0.347823	0.356449	0.341639	0.466827	0.338867
Gm49322	0.0367367	-1.04779	0.121376	0.824771	0.602155	1.2224	0.334761	1.41617	1.67548	1.66588	0.51193	1.96014	1.94851	1.5859
Pik3c2g	0.036902	-3.34945	0.005022	0.004761	0	0	0	0	0.005473	0.019929	0.015885	0.027964	0	0.030463
Gpha2	0.0373491	-1.01833	0.066868	0	0	0	0.276637	0	0.072872	0	0.070507	0.074474	0.415533	0.062407
Speer4b	0.0375045	-2.70457	0	0	0	0.047899	0	0.019654	0.044057	0.100275	0.127882	0.022513	0.04187	0.103757
5730507C01Rik	0.0377033	-1.9107	0	0.019105	0	0	0.027787	0.029388	0.087836	0.059976	0.021247	0.011221	0.031304	0.075222
Pou5f2	0.038517	-1.91321	0.036744	0	0	0.043535	0.05067	0	0.160172	0.109367	0	0.040923	0.114167	0.068585
Acot4	0.0387042	-1.12402	0.076083	0.124239	0.080523	0.145235	0.069947	0.102744	0.198074	0.201298	0.218388	0.11769	0.17511	0.394485
1700016D06Rik	0.0388686	-3.42376	0	0	0	0	0	0.030895	0.103883	0.094577	0.033504	0.035389	0.049364	0.014827
Pcdha3	0.0394833	-1.56893	0.02072	0.196463	0	0.306879	0	0.261904	0.541942	0.185022	0.327722	0.542314	0	0.734846
Trim14	0.0398044	-1.33145	0.152442	0.07227	0.022688	0.067733	0	0.222331	0.166131	0.302497	0.16074	0.360787	0.157886	0.204517
Pzp	0.0400943	-2.87912	0	0	0	0	0	0.005608	0.006286	0	0	0.012848	0.005974	0.01615
Dnajc22	0.0401661	-1.74208	0.027687	0	0	0	0	0.1346	0.120692	0.05494	0	0.123344	0.114702	0.129199
Efcab9	0.0403236	-1.84505	0.024554	0.069845	0	0	0	0.143247	0.294353	0.146173	0.051782	0.10939	0	0.252081
Trarg1	0.0406426	-1.09576	0.108584	0.213265	0.055409	0.25731	0.010696	0.241319	0.456433	0.176991	0.294414	0.440549	0.273121	0.253351
Runx3	0.0406882	-1.68469	0	0	0.063107	0	0	0	0.02888	0	0.089418	0	0.054894	0.029679
Ccn6	0.0411204	-1.46648	0.027332	0.051831	0.09763	0	0	0	0.119146	0.081354	0.11528	0.121765	0	0.051018
C7	0.0414141	-1.84535	0.038282	0.108891	0	0	0	0.065137	0.166876	0.170917	0.100913	0.042636	0.227979	0.053592
Mfsd4b5	0.0415501	-1.73139	0	0	0	0.005138	0	0.008432	0.004726	0.004302	0.004572	0.019318	0	0.012141
Nlrp1b	0.0416956	-1.0777	0.004062	0.119392	0.019345	0.125131	0	0.098735	0.101813	0.100752	0.162754	0.185481	0.109381	0.113728
Pcdhgb5	0.0428701	-1.06458	0.45177	0.199898	0.07172	0.202215	0	0.556394	0.875265	0.179292	0.222301	0.234807	0.519891	1.06813
4930562C15Rik	0.0428821	-1.85351	0.010669	0	0	0.012641	0	0.005187	0.023254	0.02117	0.005625	0.005941	0.022099	0.024893
Hspa1b	0.043528	-1.44042	2.45779	1.06557	0.69624	1.24494	3.55315	7.60446	4.44091	4.88614	2.78425	3.50055	16.7779	12.7226
Apol7e	0.0438788	-2.92047	0	0.025778	0	0	0	0.026434	0.014814	0.026974	0.114668	0.03028	0.056316	0.152241
1300017J02Rik	0.0440031	-1.44017	0.024919	0.023627	0	0.044287	0	0.012114	0.101837	0.024724	0.013138	0.090198	0.025809	0.029071
Sec31b	0.0441631	-1.31864	0	0.135246	0.092637	0.268873	0	0.289987	0.487542	0.334508	0.341827	0.361056	0.201454	0.235993
Gpr55	0.0444488	-1.28335	0.063149	0.286071	0.016709	0.16627	0.067732	0.484377	0.665253	0.452502	0.170164	0.679873	0.101739	0.569715
Olfr374	0.0446419	-1.04224	0	0	0	0.020786	0	0.011372	0.009559	0	0	0.026052	0.006057	0.024559
Gm21119	0.0447427	-2.53534	0.040619	0.009628	0	0.012032	0	0	0.077466	0.090677	0	0.079169	0	0.113728
Chrna6	0.0453436	-1.03383	1.33956	1.61272	1.24869	2.0675	1.19102	2.34786	1.48866	2.45703	2.89929	3.0035	3.2403	6.99125
Gm1141	0.0457089	-1.05169	0.188185	0.227094	0.305543	0.16216	0.094368	0.116438	0.391523	0.585595	0.243526	0.228645	0.522701	0.29538
Aqp8	0.0457243	-4.41454	0	0	0	0	0	0.0315	0.141227	0.257151	0.136644	0.036083	0.100664	0
Klhl30	0.0457953	-1.07629	0.190689	0.172943	0	0.127703	0.0686	0.112857	0.352376	0.180969	0.253521	0.16621	0.326301	0.139279
Lrrc25	0.0458386	-1.11796	0.200964	0.42873	0.329009	0.23811	0.103925	0.537345	0.848662	1.09664	0.834366	0.363712	0.494332	0.35167
Gm3685	0.0459501	-2.84904	0	0	0.061416	0	0	0	0	0.076767	0.054389	0.057449	0.133559	0.120352
Fam221b	0.0472106	-1.3862	0.163994	0.272112	0.29289	0	0.150768	0.146164	0.640411	0.271182	0.20174	0.5175	0.566165	0.484669
Mroh6	0.0473385	-2.11506	0	0.021916	0	0	0	0.033711	0.050379	0.068799	0.048744	0.051486	0	0.021572
Gimap4	0.0473674	-1.31143	0.167297	0.052875	0.132795	0.09911	0	0.298216	0.288672	0.470294	0.264604	0.341598	0.288784	0.208181
Ssmem1	0.0474	-1.73417	0	0.026876	0.0675	0.033585	0	0.110243	0.015446	0.224989	0.119554	0.09471	0.205505	0.132274
Slc22a14	0.0477296	-1.91814	0.021061	0	0	0	0.029044	0.040956	0.080333	0.062688	0.022208	0.093827	0.06544	0.019656
Lrrc15	0.0478902	-2.48056	0	0	0	0.011429	0	0.009379	0.005256	0	0.010171	0.053716	0.019981	0.027008
Ifi207	0.0478993	-1.21621	0.07484	0.099345	0.09802	0.141878	0.041283	0.058214	0.163121	0.215337	0.078914	0.233389	0.348807	0.153665
Mindy4b-ps	0.0480874	-1.81231	0.074557	0.017673	0	0.066254	0	0.036246	0.040626	0.110959	0.176884	0.083038	0.115829	0.156562
Chtf18	0.0484582	-1.04696	0.247922	0.532827	0.275511	0.450414	0	0.21695	0.459313	0.467362	0.714538	0.754734	0.787443	0.377925
Nup210l	0.0488924	-1.0033	0.06716	0.076414	0.042648	0.03183	0	0.10448	0.107346	0.226555	0.04721	0.079786	0.060284	0.125359
Gm4779	0.0497177	-1.24857	0.097501	0.246526	0.283777	0.12836	0	0.126401	0.484057	0.354704	0.239886	0.56709	0.269288	0.181994
Gbgt1	0.0498064	-1.28583	0.306481	0.163459	0.091229	0.272349	0	0.484239	0.918505	0	0.363559	0.469346	0.317425	1.14414
SSC_HU (Early vs Late)(38 vs 48)
			Rhythmic in SSC_HU_Early						Arrhythmic in SSC_HU_Late
Gene	pvalue	log2FoldChange	ZT0	ZT4	ZT8	ZT12	ZT16	ZT20	ZT0	ZT4	ZT8	ZT12	ZT16	ZT20
Gm3033	0.000388454	1.43966	0.435491	0.540882	0.510371	0.727962	0.303528	0.720617	0.187908	0.13019	0.095828	0.289013	0.106003	0.385072
Slc22a7	0.000710024	1.19783	0.124194	0.172186	0.386743	0.260446	0.237423	0.147965	0	0.076377	0.209882	0.093087	0.12092	0.079067
Tmem235	0.00149156	1.39748	0.100358	0.119262	0.259232	0.392161	0.1713	0.284683	0.059387	0	0.121144	0.201487	0	0.1217
Gm12666	0.00201036	5.01923	0.20492	0.236755	0.240155	0.249122	0.040807	0.203452	0	0	0	0	0	0.036239
Matn1	0.00250991	1.06285	0.443363	0.623728	0.576359	1.0344	0.529739	0.466078	0.067519	0.240582	0.220371	0.586437	0.228534	0.415092
Ccdc18	0.00525182	1.3048	0.078178	0.025503	0.087771	0.054509	0.049452	0.105013	0	0	0.058287	0.008617	0.026865	0.068314
Piwil4	0.00541842	1.97014	0.039723	0.034421	0.019951	0.045273	0.035597	0.024649	0.020568	0	0	0.009304	0	0.021075
Endou	0.00723485	1.11306	0.39924	0.50739	0.754348	0.693366	0.772318	0.519068	0.275626	0.282549	0.180722	0.204839	0.388715	0.353017
Gucy1b2	0.0105455	1.75062	0.076046	0.039537	0.085938	0.112672	0.079503	0.056626	0.068906	0	0	0.017812	0.03702	0.010086
Erich4	0.0106153	1.68431	0.114569	0.198552	0	0.365616	0.342225	0.113748	0	0	0	0.241519	0.111549	0
Mylk3	0.0110871	1.60792	0.025017	0.099719	0.037696	0.125457	0.059783	0.062095	0	0	0.013212	0.070318	0.024358	0.026545
Gm2244	0.0111092	1.3859	0.173262	0.192171	0.052214	0.06319	0.082807	0.034404	0.125596	0.053276	0	0.016233	0.033739	0
Vamp9	0.0134055	2.29653	0.231939	0.144705	0.512575	0.190329	0.277126	0.20725	0.024019	0	0.048996	0.130384	0.09033	0.02461
Gsc2	0.0144381	1.07859	0	0.030867	0.178916	0.101498	0.21281	0.198938	0	0	0.070547	0	0.130061	0.141741
Btbd18	0.0149134	1.6284	0.133469	0.066822	0.044691	0.081129	0.053157	0.073618	0.038393	0	0.046991	0.013894	0	0.047207
Kif28	0.015634	3.33364	0.015362	0.031948	0	0.021011	0.036711	0.045757	0	0	0	0	0.014957	0
Gm4131	0.0159582	1.70102	0.02827	0	0.014199	0.051552	0.067555	0.014034	0	0	0	0.026487	0.027525	0
Lpar5	0.0169139	1.43686	0.258348	0.274605	0.346023	0.282667	0.205787	0.188098	0.142686	0.05296	0	0.129094	0.067077	0.18275
Pebp4	0.0197363	1.00085	0.072548	0.167638	0.145753	0.220492	0.231152	0.288113	0.100171	0.099146	0	0.067971	0.141271	0.153957
Pbld1	0.0204505	1.66079	0.117969	0.091999	0.059251	0.02689	0.096904	0.043921	0.045812	0	0.046725	0	0.014357	0.031293
Tm4sf4	0.0231389	1.46262	0.331397	0.12091	0.175209	0.174935	0.25008	0.311706	0	0.107265	0.07369	0.09805	0.067929	0.148057
Olfr1535	0.023967	2.26867	0.026363	0	0.026483	0.012019	0.094499	0.026174	0	0	0	0	0.038503	0
Cltrn	0.0241274	1.84788	0.067599	0.187442	0.135809	0.154088	0	0.268458	0	0	0	0.031667	0.032908	0.161386
Rdh1	0.0254739	2.43545	0.039837	0.027615	0.053356	0.072645	0.15866	0.079103	0	0.013611	0.028051	0.018662	0.019393	0
Klk13	0.0256698	4.77426	0.022719	0.102371	0.057055	0.04143	0	0.06767	0	0	0	0.010643	0	0
Fpr2	0.0287493	1.16997	0.271804	0.231899	0.189023	0.362205	0.124907	0.249098	0.021652	0.12858	0	0.235068	0.183211	0.066554
Apoh	0.0291582	1.28927	0.233571	0.497307	0.469255	0.212964	0.398679	0.182205	0.138216	0	0.299567	0.109418	0.162438	0.106215
Pnpla1	0.0337484	1.43173	0.012446	0.07765	0.025005	0	0.044612	0.012357	0	0.063784	0	0	0	0
Klrg2	0.0346766	1.17918	0.518509	0.237862	0.497875	0.361525	0.346205	0.181692	0.142133	0.109417	0.064431	0.228611	0.207875	0.194179
Cd300lb	0.035322	2.84274	0.01789	0.049607	0.035943	0.097872	0	0.071049	0	0	0	0	0	0.037966
Slc38a11	0.0378351	1.63553	0.277908	0.113077	0.20634	0.143221	0.158807	0.26392	0.031282	0	0	0.181131	0.123527	0.038463
Il12rb1	0.0396373	1.09404	0.71648	0.877839	0.920573	1.3825	0.527575	0.85196	0.474509	0.085392	0.211189	0.444918	0.681368	0.574595
Majin	0.0405883	1.46276	0.349817	0.011023	0.031945	0.231967	0.151989	0.031574	0.26346	0	0	0.029795	0	0
H2bc15	0.0417749	1.23939	0.547888	0.474754	0.687959	0.374663	0.327314	1.22392	0.42553	0	0.434019	0.256662	0.133361	0.290673
Rad21l	0.0439379	1.08721	0.330294	0.141739	0.26859	0.21511	0.263094	0.156155	0.097726	0	0.033225	0.07368	0.275645	0.166888
Topaz1	0.0453652	3.46439	0.031125	0	0.041688	0.037839	0	0.010301	0	0	0.010958	0	0	0
Gm4788	0.0461074	1.30575	0.024562	0.017027	0.024673	0.052255	0.048912	0.016257	0	0	0.025943	0.023013	0.007972	0.017375
Gltpd2	0.0467749	1.5386	0.241977	0.265591	0.141792	0.1287	0.14456	0.240243	0	0	0	0.075571	0.196332	0.128377
			Arrhythmic in SSC_HU_Early						Rhythmic in SSC_HU_Late
Gene	pvalue	log2FoldChange	ZT0	ZT4	ZT8	ZT12	ZT16	ZT20	ZT0	ZT4	ZT8	ZT12	ZT16	ZT20
Gm11100	0.000518276	-1.13599	0.107443	0.101081	0.077092	0.118956	0.064187	0.236204	0.198685	0.22025	0.243178	0.23009	0.20922	0.447872
Ngp	0.00154404	-1.33367	0.128117	0.059208	0.300292	0	0.204103	0.296798	0.442245	0.306404	0.54128	0.340099	0.498959	0.362509
Rsph6a	0.00184603	-1.73854	0.041816	0.210158	0	0.028595	0	0.051895	0.227341	0.375026	0.176668	0.137123	0.071249	0.122016
Dqx1	0.00215086	-1.21694	0.343432	0.280395	0.153327	0.153087	0.282678	0.197005	0.750807	0.790059	0.475592	0.39327	0.527574	0.340111
Slc38a5	0.00364541	-1.10197	1.7116	1.98558	1.60238	1.19964	0.820805	1.91898	3.76198	3.84283	2.76709	3.94906	3.16291	2.34737
Il2ra	0.00538945	-1.2157	0.030056	0.048615	0.010064	0.059375	0.035911	0.039787	0.062249	0.097552	0.063491	0.079785	0.131684	0.085042
Ifi204	0.00571687	-1.27493	0.159105	0	0.273985	0.186516	0	0.214381	0.258913	0.093187	0.552164	0.521737	0.254496	0.337642
Pif1	0.00589019	-2.13828	0.055473	0.019227	0	0.02529	0	0	0.129253	0.071073	0.102536	0.064967	0.013503	0.058861
Tnfrsf17	0.00659891	-1.3686	0.384194	0.22194	0	0.116766	0.153014	0.063573	0.530477	0.328156	0.338162	0.299964	0.623443	0.305742
Wfdc17	0.00681169	-1.25184	0.293732	0.203619	0.688475	0.178545	0.292464	0.340231	0.963231	0.551954	1.55123	0.550403	0.619642	0.519449
Lrg1	0.0107199	-1.50885	1.0378	1.41313	2.77377	2.70354	3.8528	1.98712	3.70389	5.96437	6.47899	7.84807	12.414	2.7726
Kif12	0.0108619	-2.16466	0	0.016007	0.046392	0.147379	0	0.045852	0.298907	0.118339	0.121948	0.259615	0.224826	0.122507
S100a8	0.0119694	-2.23274	0.966414	0.297747	1.18652	0.195812	1.28299	0.426439	3.11355	5.99829	4.70678	2.21332	3.18873	1.2533
Kif20b	0.0128542	-1.00585	0.026785	0.04023	0.07175	0.036633	0.021336	0.062051	0.073967	0.128118	0.122594	0.083651	0.026079	0.085263
Cdiptos	0.0145334	-1.1655	0.412253	0.487505	0.121799	0.066332	0.173848	0.577833	0.502252	0.845092	0.947701	0.295364	0.661105	0.874857
Phf11d	0.0147789	-1.14011	0.193215	0.140317	0.166362	0.08389	0.065959	0.182695	0.428756	0.282913	0.223513	0.439634	0.206037	0.253827
Ifi206	0.0153032	-3.6139	0	0	0.025748	0	0	0.016965	0.070782	0.070058	0.207559	0.080049	0.058231	0.036263
Ms4a4c	0.0164223	-1.20269	0.030288	0.230957	0.030425	0.220928	0.108566	0.030071	0.282287	0.248355	0.287918	0.283773	0.235917	0.160689
Slc4a1	0.016544	-1.63316	0.02134	0	0.053591	0.029186	0.038246	0.010593	0.049722	0.125767	0.078888	0.069977	0.093497	0.056607
Ube2u	0.0182392	-1.39582	0.169767	0.023537	0.034107	0.061916	0	0	0.210965	0.069602	0.053793	0.22268	0.132233	0.072054
Cd7	0.0221487	-2.33568	0.060682	0	0.060956	0	0	0.060247	0.18852	0	0.256374	0.255842	0.088623	0.128775
Ccl22	0.0227469	-1.28303	0.044892	0.124477	0.202926	0.040931	0.053637	0.04457	0.162708	0.092025	0.3082	0.294416	0.196686	0.190532
Soat2	0.0231576	-2.16269	0.023582	0.081736	0.035533	0.021501	0	0.070238	0.195363	0.326302	0.049815	0.176753	0.218121	0.075065
Fbxl13	0.0249464	-1.03184	0.273618	0.264396	0.191566	0.181439	0.297204	0.148177	0.643974	0.645884	0.62179	0.349577	0.371352	0.140765
Glb1l3	0.0254245	-1.0698	0.019934	0.027637	0.060072	0	0	0.019791	0.061928	0.061294	0.063163	0	0.038816	0.042302
Ccdc68	0.0264704	-1.30278	0.059034	0.065477	0.023721	0.075357	0	0	0.146721	0.048407	0.124707	0.11062	0.045982	0.075167
Gm1141	0.028605	-1.30814	0.244024	0.181244	0.008755	0.095355	0.083304	0.138443	0.361004	0.643159	0.128872	0.12248	0.271533	0.332906
Slfn4	0.0287544	-1.55205	0	0	0.105797	0.012004	0	0	0.013633	0.053975	0.097337	0.061673	0.076908	0.041907
Ifitm6	0.0300072	-1.0231	0.374819	0.299803	0.231701	0.18402	0.55119	0.286256	1.13459	0.768356	0.639518	0.189093	0.757948	0.428302
Mcemp1	0.0315119	-1.71651	0.069861	0.1695	0.035089	0.063698	0	0.069361	0.072346	0.340126	0.350498	0.359997	0.06802	0.148255
Ccdc150	0.0320047	-1.58572	0.098334	0.072176	0.052295	0.063288	0.082935	0.086143	0.107821	0.438729	0.26882	0.205939	0.191483	0.15344
Oprm1	0.0321449	-1.04791	0.016429	0.038723	0.069316	0.02996	0.007852	0.039148	0.061249	0.060623	0.069412	0.040022	0.073583	0.111569
Lst1	0.0337721	-1.21693	1.82338	2.26646	2.27374	2.06381	1.95324	2.12243	7.5529	4.76893	7.83639	2.59198	3.24453	3.06888
S100a9	0.0341852	-1.85406	1.64957	0.346516	1.75746	0.683653	0.716705	1.24072	3.83059	7.68525	5.01574	2.24801	1.8981	2.43982
Gm4779	0.0346521	-1.01719	0.033113	0.313711	0.110877	0.161023	0.039564	0.142462	0.217175	0.622232	0.279799	0.134438	0.085974	0.281083
Spata25	0.0351872	-1.65604	0	0.040511	0	0.026642	0.034912	0.174062	0.181553	0.239594	0	0.082129	0.056899	0.310041
Cd8a	0.0368556	-1.30715	0.033325	0.034652	0.066951	0.045577	0.06968	0.049629	0.155294	0.170783	0.070396	0.062445	0.097338	0.185638
Ltf	0.0379677	-2.62234	0.065186	0	0.018709	0.016982	0.022253	0	0.173583	0.085904	0.059015	0.052349	0.308273	0.079048
Tph1	0.0416643	-1.36712	0.027432	0.030426	0.033067	0	0	0.038129	0.034089	0.03374	0.092717	0.061683	0.064101	0.046571
Ulbp1	0.0417168	-1.16783	0.023277	0.010757	0.023382	0.028298	0	0.007703	0.032139	0	0.049171	0.065425	0.030217	0.032931
Xlr4b	0.0421398	-1.40265	0.051772	0.107667	0.07801	0.023602	0.154646	0.051401	0.28147	0.358188	0.027341	0.060633	0.315046	0.192268
H3c6	0.0436351	-2.01016	0.187272	0.043273	0.031353	0.056917	0.298341	0.123953	0.581795	0.351904	0.956035	0.584858	0.212724	0.298062
Bpifa1	0.0436571	-1.81284	2.2631	0.04683	3.68145	0.277178	1.27128	0.368891	10.3013	5.27969	7.52776	0.474701	1.69369	2.50882
Lcn2	0.0437425	-2.25337	0.442257	0.306578	1.00699	0.376357	0.140912	0.248817	1.09916	4.41212	1.74392	1.38119	2.68406	0.703898
Flacc1	0.045186	-2.23655	0.016515	0.022896	0.033179	0	0	0.065585	0.136816	0.16927	0.156988	0.123783	0.064317	0
Il1a	0.0455247	-1.47839	0.208507	0.103243	0.059843	0.027159	0.177949	0.118293	0.185076	0.305305	0.424729	0.502337	0.20301	0.316058
Cxcl9	0.0481471	-2.38726	0	0	0	0	0.032375	0.053803	0.14965	0	0.038159	0.016924	0.140701	0.105418
Cd300ld5	0.0495544	-2.34646	0.091877	0	0	0	0	0.030406	0.285435	0	0	0.057388	0.149092	0.129984
AR_Ctrl (Early vs Late)(884 vs 4350)
			Rhythmic in AR_Ctrl_Early						Arrhythmic in AR_Ctrl_Late
Gene	pvalue	log2FoldChange	ZT0	ZT4	ZT8	ZT12	ZT16	ZT20	ZT0	ZT4	ZT8	ZT12	ZT16	ZT20
Mapk15	1.8048e-08	2.22125	10.3032	10.2874	10.1333	9.94495	11.8399	11.2932	2.1661	1.82516	2.17257	1.70855	2.95532	2.85494
Tmsb4x	5.91001e-08	1.24572	660.755	759.219	719.225	689.472	672.712	670.975	256.723	325.544	321.012	313.463	282.747	259.989
Matk	6.96585e-08	1.77511	113.908	119.303	116.613	119.766	123.5	117.507	35.6435	30.378	33.4968	35.3399	35.4215	37.3373
Zdhhc1	1.64486e-06	1.0231	32.0736	36.0516	35.3873	34.7713	37.3118	36.836	17.0337	15.7953	16.6764	17.0457	19.5172	18.4605
Rgs11	1.65536e-06	1.74665	18.2978	16.0321	17.1757	17.8575	21.1291	19.3183	5.29054	4.99694	4.79961	4.62084	6.34386	6.67091
Ap1g2	2.04048e-06	2.11437	6.22874	6.31707	7.42139	7.08038	6.47015	7.27462	1.47404	0.969511	1.48558	1.37535	1.79398	2.32239
Rpl30	2.53126e-06	1.10216	328.47	382.208	336.141	353.346	324.914	333.254	139.337	170.621	176.033	172.859	159.777	140.179
Cdk10	3.28467e-06	1.31141	36.2765	36.7176	37.7635	39.2154	40.451	37.478	17.7763	13.8031	15.3699	16.1761	14.179	14.5234
Rpl21	3.45147e-06	1.43123	134.173	156.628	125.905	136.994	131.72	137.667	43.3855	57.6188	54.3541	54.3046	49.3198	46.2298
Clasrp	3.52137e-06	1.63248	60.5554	59.7811	66.0499	66.8516	67.8217	59.783	17.9016	17.5429	21.3091	19.6467	20.8923	25.5416
Akap8l	3.84421e-06	1.95615	119.242	111.704	108.659	119.29	119.093	106.001	26.8451	24.7519	25.4571	26.2818	33.759	39.1792
Eno3	4.15912e-06	1.98282	22.0353	20.3758	20.5803	23.4697	21.6763	19.6768	4.41591	6.38684	6.20942	4.96078	5.65593	4.70752
Ggnbp1	4.77544e-06	1.68517	3.22974	3.63125	3.13015	3.46801	3.5635	3.38052	0.85506	0.921957	1.03404	0.905582	1.22038	1.40768
Inha	5.19697e-06	1.37235	42.0252	35.4985	40.7008	39.4259	42.9041	43.8919	15.3447	12.5784	13.856	12.4551	16.0815	24.1047
Ilkap	5.65101e-06	1.19525	26.8694	27.6902	28.4189	25.8728	30.7555	24.9324	12.777	12.3227	11.2653	12.0611	12.4608	10.9693
Rab24	5.80727e-06	1.56618	79.1339	94.0548	88.4822	86.6474	95.7342	78.381	30.7236	30.1218	29.3886	30.4906	28.913	26.7891
Rps12	7.27351e-06	1.77319	483.521	612.029	473.96	527.291	575.207	521.41	134.651	164.361	161.069	172.51	162.791	138.885
Rps24	7.4076e-06	1.21351	200.955	231.893	185.961	205.994	206.223	206.127	74.5533	95.551	94.007	95.2592	88.3836	85.7278
Tm2d3	7.52917e-06	1.09762	78.0422	91.5441	79.7183	79.6521	88.0729	85.288	35.7615	39.3781	38.0489	43.6585	41.0597	36.8199
Lamtor4	7.68367e-06	1.14188	52.0605	56.6852	52.0207	54.2383	58.8784	52.9328	25.8673	23.6411	27.0981	24.8514	23.8766	22.7679
Rps6kb2	7.73744e-06	2.52117	29.0105	25.3688	25.61	27.1602	31.8542	24.8731	4.48181	4.48303	4.65516	3.96973	4.90239	6.05543
Trim12a	7.86555e-06	1.05125	2.06089	2.52825	1.88089	2.01521	2.32532	2.47643	0.652812	1.28577	0.850281	0.941963	1.25143	1.42935
Tbx1	8.05589e-06	1.58853	3.90418	3.22899	3.13606	3.15334	3.08689	4.13025	1.48574	0.772715	0.926965	0.779303	1.35215	1.54604
Tsr3	8.13406e-06	1.10726	30.6113	32.8647	30.2691	30.9279	31.8128	27.859	14.3513	13.368	16.0531	14.6903	13.4158	13.6899
Ndufa6	8.47828e-06	1.32282	241.154	287.696	273.254	251.192	288.844	257.966	103	113.571	115.647	118.177	102.041	87.2105
Serf2	8.53424e-06	1.278	27.398	31.4519	27.1527	25.8434	29.0577	24.8168	12.0953	11.5407	11.955	11.5797	11.3319	9.83521
Safb2	8.56067e-06	1.55266	44.3567	41.5075	38.9792	44.9759	45.2672	38.9126	13.5868	12.3762	13.1352	14.1082	15.7918	17.5854
Prkag1	8.70657e-06	1.3523	31.0048	39.5248	35.2415	34.6168	37.4336	34.7992	13.5041	13.9106	13.4458	13.9088	13.6639	14.8433
Mpc1	9.02299e-06	1.04126	39.6331	50.3077	49.5198	47.9651	45.6401	45.0099	20.9168	28.7055	26.0614	21.4309	19.3722	18.6312
Echdc2	9.07827e-06	1.24361	9.42765	9.61659	10.616	8.88366	10.0303	9.52431	3.86822	3.32796	4.50756	4.36727	3.81317	4.65162
Ifitm3	9.25773e-06	1.4813	67.7151	58.197	52.5342	56.5189	66.5357	57.7744	21.4304	18.5346	19.5142	22.3666	24.3984	22.4365
Megf6	9.32551e-06	1.23409	6.97366	5.77428	7.00339	6.98555	8.0267	6.23492	2.65533	2.16747	2.38214	3.08759	4.01627	3.12006
Col5a3	9.7391e-06	1.54019	2.86201	3.28915	3.02063	2.55935	2.78258	2.89019	1.29904	0.941461	1.04156	0.777629	0.899663	1.02481
Zfp692	1.00687e-05	1.44566	27.2647	25.1461	30.5327	26.2209	28.6818	27.2037	9.8735	8.21426	9.10998	9.02149	11.1076	13.2671
Ccl27a	1.05071e-05	1.15999	40.7423	46.4939	44.0448	42.3234	46.0417	46.7104	19.7916	21.3078	20.2734	21.5884	18.6445	17.5931
Pcsk4	1.06863e-05	1.41545	5.92487	6.64748	7.66591	7.9571	6.32823	8.42526	2.2667	1.96863	2.91263	3.03928	2.59333	3.32063
Il11ra1	1.17907e-05	1.0323	26.2757	26.3022	26.2967	23.5065	29.3934	25.4738	13.5331	11.3995	12.5107	13.3622	13.8702	12.2078
Rgl2	1.19332e-05	1.61129	43.5072	38.9898	43.94	41.0109	41.5801	39.057	12.0652	11.7368	12.8932	11.2215	15.0933	18.1894
Stxbp2	1.22439e-05	1.38427	11.0266	12.526	12.5672	13.3295	12.9285	12.4134	4.59926	4.88606	4.87445	3.95205	4.56209	5.77736
Trmt1	1.30116e-05	1.49757	38.4486	40.0104	39.1203	44.5476	47.6528	37.7013	15.1384	13.2921	14.1268	14.9772	15.0492	15.0616
Ppox	1.32137e-05	1.21452	17.4367	19.6459	18.7222	18.4408	20.8671	21.7039	8.9496	7.36675	8.14213	8.20379	8.34019	9.33591
Rpl23	1.41077e-05	1.13215	197.456	214.069	189.821	193.25	184.412	202.671	77.9192	91.1153	98.4352	102.016	88.4422	81.1967
Crabp1	1.42054e-05	1.84012	30.3508	33.2808	26.0724	30.7888	31.3303	28.553	7.17599	6.37319	6.94084	12.3562	8.8157	8.71682
Mov10	1.60708e-05	1.18905	7.222	6.27865	6.34883	7.14012	6.78974	6.33493	2.9647	2.32651	2.42767	2.92392	3.40685	3.5442
Comtd1	1.63732e-05	1.52648	6.44602	7.57198	7.91781	8.22303	8.3483	7.08196	2.13398	3.00999	3.66545	2.63281	2.23136	2.15144
Anapc13	1.67742e-05	1.23688	53.3575	51.534	56.7953	48.8003	57.9607	54.1556	22.0436	24.8612	27.3995	23.1631	20.3311	19.079
Pin4	1.68093e-05	1.08249	47.2996	44.5944	45.7134	51.6826	47.6021	53.0293	20.2181	23.164	25.6936	24.9149	19.7313	23.1827
Kcp	1.70755e-05	1.48509	1.26688	0.964645	1.11409	1.26026	1.36616	1.16441	0.344544	0.304812	0.336097	0.54064	0.490575	0.532662
Rpl26	1.72547e-05	1.64797	760.066	934.015	698.943	776.734	830.688	723.184	217.982	268.576	274.015	278.108	249.483	219.098
Rpl31	1.81974e-05	1.61293	543.558	676.547	529.884	569.709	644.638	577.28	178.237	198.172	210.892	207.324	184.868	178.381
Mtx1	1.85869e-05	1.10253	16.3216	18.8564	18.2966	15.6718	17.0071	14.6027	8.64119	9.13166	7.1148	7.82383	7.54303	6.66751
Alad	1.8656e-05	1.03379	28.9421	33.6915	30.1473	33.0151	33.9373	30.237	16.5799	15.1233	15.3358	16.5086	14.7259	14.5128
Gm2000	1.94011e-05	2.13518	249.886	248.14	187.515	212.698	245.081	229.062	47.324	55.6534	58.7384	52.8598	51.2421	46.5902
Fdxr	1.96192e-05	1.47743	18.2206	16.9439	14.799	14.1928	17.3871	16.6353	5.80354	5.8773	5.99933	5.83932	5.46249	6.27663
Lrrc45	1.98546e-05	2.01807	60.5937	52.0708	46.3558	57.5268	61.674	52.7488	11.9946	11.4501	12.5915	11.9414	14.8799	18.8549
mt-Co3	1.9873e-05	2.75597	28427.5	26103.2	22980.1	26848.6	20119.9	22085	2832.96	4469.76	3893.75	3645.02	3363.64	3491.86
Lmbr1l	1.99145e-05	1.15515	5.97245	4.8265	5.54045	5.37276	5.89454	5.91195	2.5269	2.41436	2.17014	2.43426	2.25387	3.25098
Pdlim7	2.04323e-05	1.13871	24.4352	25.2781	24.7173	23.9557	28.1089	23.9438	10.5177	9.9579	9.95363	10.8815	12.7198	14.2939
Rps26	2.04614e-05	1.2027	636.39	732.114	585.697	633.511	734.224	610.117	270.433	287.866	277.09	323.236	299.139	250.56
Amy1	2.11877e-05	1.45678	35.385	38.2307	34.5875	42.1184	31.9606	39.9436	9.19246	11.9193	14.5114	13.9273	12.1711	19.2366
Rps17	2.13327e-05	1.33591	511.722	609.222	517.13	526.696	632.478	529.027	207.816	219.696	233.671	234.865	221.437	200.196
Rps25	2.18967e-05	1.02161	563.722	685.989	559.257	596.999	659.793	583.644	281.909	303.702	302.101	333.448	316.209	260.203
Cyba	2.23766e-05	1.32626	17.6556	23.6998	21.1633	18.5043	21.0293	19.9236	6.78108	8.77889	7.14347	8.90055	9.2722	7.76807
Cpxm1	2.29588e-05	1.28431	8.76501	10.6091	8.20572	9.57698	10.9579	9.86445	3.62139	3.71192	3.58024	4.54688	4.31129	4.03263
Polr2i	2.39687e-05	1.32647	43.5972	53.2987	44.0153	41.4687	51.772	47.5771	17.8394	19.3236	20.6081	18.0699	19.9295	16.5668
Fam174c	2.40992e-05	2.00503	16.7615	19.7341	18.7648	15.5417	19.6502	15.2428	3.88259	4.78984	4.83889	3.60062	3.82095	5.39891
Rpl38	2.60133e-05	1.91613	735.439	909.895	683.485	731.76	864.363	818.341	178.845	223.1	239.245	228.984	193.429	193.198
Fah	2.60387e-05	1.5212	43.6394	43.1162	36.2882	40.1479	45.2903	34.6144	14.2122	14.3465	13.4532	14.7053	13.5152	14.4617
Bola3	2.66901e-05	1.02631	15.5678	15.8472	14.3691	14.1176	16.1323	16.4679	7.35084	7.5868	8.03879	7.4085	8.55886	6.47141
Rnf25	2.74236e-05	1.25436	65.8058	54.4577	51.0132	59.7798	61.4094	52.958	21.898	21.1716	21.3849	26.0498	29.082	25.2085
Kmt5c	2.74906e-05	1.39642	20.1426	15.6177	18.6529	16.2554	20.4802	18.3357	6.72032	5.53729	5.59262	5.35828	8.46067	9.92087
Atp5k	2.75627e-05	1.51893	340.004	397.07	372.725	374.143	415.343	437.993	130.43	136.02	167.148	131.156	122.562	128.264
Rpl36al	2.76622e-05	1.23226	109.527	137.034	116.118	115.494	130.452	112.485	43.3373	53.1181	61.6339	54.9394	48.8052	45.1055
Rpl37	2.81217e-05	1.51471	372.072	465.166	368.327	382.968	457.701	389.149	129.477	140.214	147.185	156.996	144.724	133.707
Rhpn1	2.9954e-05	1.40484	10.9821	10.2763	8.13559	9.53156	10.3906	8.44591	4.0765	3.18962	2.90466	3.24381	4.3487	4.05104
Ndufaf8	3.01738e-05	2.06415	63.1717	89.3301	66.046	72.903	74.1667	78.1104	19.4627	18.958	16.409	19.0807	17.9789	14.2184
Pfdn2	3.02562e-05	1.14337	158.593	175.814	157.887	160.735	188.326	171.177	77.129	77.9096	82.1708	80.8349	72.4874	67.8403
Ndufa1	3.04507e-05	1.5246	274.112	319.866	308.789	278.526	341.752	320.945	98.6118	115.046	135.998	110.996	93.1289	87.1471
Adamts10	3.05337e-05	1.73545	14.1076	13.7003	15.981	15.2443	15.4331	13.7483	4.05823	3.3628	3.78816	3.49041	5.20703	6.5856
Rpl35a	3.08185e-05	1.38733	212.67	283.559	234.591	246.81	303.324	224.698	80.6179	102.921	95.5375	103.974	106.884	85.6359
Ndufa11	3.10958e-05	1.41948	130.379	153.121	133.745	138.145	161.204	141.109	58.8631	53.4666	59.8876	54.0892	51.3041	43.0387
Srpk3	3.1108e-05	1.65552	6.72881	4.8161	6.01392	5.38583	6.03934	5.93043	1.74571	1.89592	1.72399	1.44118	1.98883	2.28701
Map4k1	3.16341e-05	1.57706	2.34245	2.04383	2.22185	2.54272	1.91085	2.04409	0.728309	0.468778	0.758892	0.810498	0.869054	0.757068
Ndufa13	3.2696e-05	1.63177	366.695	466.532	388.747	372.955	427.092	407.032	144.801	128.817	154.534	131.498	116.259	107.925
Rps29	3.37064e-05	1.72979	1476.22	1649.29	1329.39	1427.72	1574.22	1691.91	414.911	437.273	573.686	466.972	442.493	422.977
Ndufa5	3.42333e-05	1.2051	193.846	237.322	210.801	223.847	217.272	233.939	86.6386	101.163	118.626	100.649	83.308	80.8604
Uqcc3	3.49214e-05	1.23055	43.8587	57.0527	52.2219	49.6661	52.4476	44.1149	20.5897	19.4338	22.8627	22.3766	22.9426	19.3691
Mroh7	3.5398e-05	1.73296	6.9675	6.93342	6.48448	6.63963	6.21111	5.23419	1.8555	1.7877	1.58686	2.06275	2.12321	2.15718
Rps23	3.58729e-05	1.28078	249.32	320.684	251.726	267.654	289.627	284.355	102.361	119.647	125.462	125.341	113.784	97.9982
Coq8b	3.6108e-05	1.31311	23.4688	23.9096	24.2636	27.1238	24.1797	20.0299	8.99732	8.57143	7.99364	10.4821	11.3656	10.1307
Ndufc1	3.6611e-05	1.31228	75.0994	86.3715	79.3682	80.1352	96.0255	81.967	31.1106	34.0217	38.5835	36.6905	31.3569	29.1622
Myl9	3.67336e-05	1.6964	46.7313	43.8093	38.0994	47.5003	48.5677	38.3867	10.7496	10.936	12.6358	15.4539	14.9558	16.4479
Miip	3.71641e-05	2.06529	15.2483	19.1558	16.819	17.8093	15.9503	14.3591	3.50546	3.13496	3.98047	3.85485	4.32332	4.9375
Rpl36a	3.74723e-05	1.25123	338.551	455.619	348.704	361.736	420.283	371.165	136.217	178.906	167.509	176.21	159.374	146.338
Cox6c	3.7579e-05	1.21347	243.587	289.725	274.533	261.536	279.386	300.341	109.152	137.451	142.064	123.22	99.987	99.2709
Churc1	3.77797e-05	1.42006	40.7138	46.8415	37.7356	48.5325	47.7588	40.8584	17.3079	18.8037	18.0988	16.047	17.0028	10.8128
Pfdn5	3.79147e-05	1.63421	306.436	390.274	295.319	320.607	390.32	313.126	103.126	113.279	108.682	115.006	108.557	100.826
Rpl29	3.79803e-05	1.32166	248.49	318.588	257.283	278.024	315.442	255.455	108.732	115.816	117	121.649	108.661	97.579
Mrpl33	3.83922e-05	1.17613	7.43131	9.61693	7.77762	8.2226	8.57634	7.86507	3.33943	3.57308	3.94738	3.98582	3.47118	3.58417
Higd1b	3.85571e-05	1.30886	4.64096	6.70482	6.25139	6.39185	5.66261	5.97092	2.28523	2.50052	2.79393	2.63794	1.7523	2.40881
Rps20	3.86991e-05	1.55451	117.532	153.201	110.007	120.944	140.289	119.656	38.6212	45.9935	44.3137	47.0148	44.869	38.4803
Atpif1	3.87403e-05	1.47556	281.891	362.101	303.729	289.786	355.998	322.891	111.414	119.385	124.765	124.242	111.745	97.5733
Tbkbp1	3.92324e-05	1.02466	42.7194	39.0086	44.6424	44.0154	51.1732	41.638	21.9902	19.6076	21.0194	21.3337	21.792	23.6256
Ssbp4	4.09281e-05	1.0309	111.295	124.828	119.158	116.691	138.213	111.021	60.2826	52.5383	60.3995	60.2802	60.2185	59.2417
Rpl36	4.10181e-05	1.98262	1476.82	1906.18	1381.59	1657.92	1883.01	1508.2	408.343	403.975	438.058	453.9	412.11	366.783
Mamdc4	4.1534e-05	1.6954	1.79473	1.40222	1.58302	1.51734	1.73336	1.41698	0.569831	0.402268	0.370301	0.319264	0.557392	0.698094
Lgals4	4.18346e-05	2.58682	7.91202	8.29558	6.70985	8.23824	8.34838	6.68984	1.3036	0.616829	1.24821	0.847302	1.58413	2.089
Doc2g	4.23321e-05	2.37059	12.5032	11.8906	12.381	14.4933	15.1803	11.2272	2.3878	1.78956	2.57327	2.53032	2.06923	3.66967
Wdr90	4.24192e-05	1.15376	4.79803	3.60703	4.83906	4.20666	4.01371	4.93561	1.91153	1.6827	1.88438	1.80093	2.0841	2.50198
Igflr1	4.3813e-05	1.79486	12.8173	12.8247	10.9056	11.2499	15.5888	12.0207	3.84069	2.6238	2.77385	2.54124	4.37717	5.57551
Rpl24	4.39524e-05	1.08454	620.225	749.713	616.68	659.491	761.219	636.688	303.908	326.783	335.065	349.066	315.575	276.532
Eif4ebp3	4.52186e-05	1.90553	12.3958	10.4725	13.6077	12.6012	13.2154	10.5974	3.01785	2.581	3.68675	3.11437	2.53896	4.5167
Tle2	4.66842e-05	1.61062	20.5097	19.9959	22.3836	21.6901	16.8284	19.9449	6.54506	5.69639	6.06856	5.79298	6.90172	8.73307
Fam193b	4.70095e-05	1.42989	65.7901	54.2754	62.1563	56.0185	59.583	54.5969	21.0933	18.9107	19.2348	18.5294	23.5229	29.5131
Ppp1r1a	4.7477e-05	1.38352	81.1509	102.257	80.6357	96.0722	103.135	85.3614	36.2021	33.9043	36.3839	39.5232	34.8993	29.3605
Col7a1	4.83828e-05	1.99043	1.26619	1.35596	1.46858	1.64234	1.65704	1.58527	0.324909	0.232926	0.405679	0.204323	0.377808	0.713136
Sap25	4.92976e-05	1.92225	15.4035	11.5466	18.7109	15.1129	16.9302	16.2279	4.32989	3.04908	3.84165	3.17885	4.30333	6.0805
Tcea2	4.97297e-05	1.27891	39.2234	46.7942	39.7437	39.6494	48.6949	40.6835	15.7908	15.7561	16.8344	19.4615	17.9297	19.2275
Ccdc183	4.98019e-05	1.35375	0.975039	0.939316	0.97645	1.12209	1.21301	1.31083	0.430783	0.310674	0.428469	0.494447	0.358305	0.534969
Shkbp1	5.06198e-05	1.4855	12.1839	12.3882	12.1161	10.638	14.3044	11.467	3.57354	4.07749	3.92272	3.71486	4.69573	6.12073
Rps27a	5.07132e-05	1.18908	185.12	241.087	200.126	204.234	234.121	206.294	83.4624	91.606	95.8271	110.075	92.9897	83.4708
Igfbp2	5.12651e-05	1.18561	91.5242	81.7151	70.7199	85.7215	95.7603	74.7654	35.5653	31.8175	34.3512	41.164	39.2398	37.7719
Polr2l	5.22272e-05	1.31462	49.3424	56.0464	46.9026	45.4559	59.2342	48.0512	21.1155	21.2222	22.3607	20.2369	19.6585	18.0387
Ddit3	5.26641e-05	1.46519	56.803	67.3089	62.607	61.7466	75.9251	57.604	24.0482	24.0675	23.6065	23.6858	21.0824	21.8636
Rpl37a	5.335e-05	1.63035	728.562	930.243	689.803	755.319	898.884	743.408	250.797	253.798	274.925	276.114	253.875	223.562
Rps10	5.37601e-05	1.54173	302.427	375.969	296.689	309.186	384.151	306.133	113.371	114.923	118.672	122.87	108.881	99.4905
Ndufa2	5.37825e-05	1.77687	480.905	613.734	467.55	492.016	606.848	499.492	157.652	154.534	166.876	168.246	142.82	132.171
Rpl35	5.38236e-05	1.85747	540.258	706.412	527.391	568.93	699.64	594.215	160.623	167.351	180.814	193.78	163.969	137.089
Rpusd3	5.38357e-05	1.17016	7.64398	7.65329	8.48925	8.01139	8.61962	7.33655	3.11773	2.95659	4.00666	2.47149	4.23799	4.43009
Trip6	5.45503e-05	1.33658	8.34511	9.92251	8.10711	7.75954	8.23461	8.30222	2.9879	3.10006	2.75366	3.12042	4.03289	4.06878
Ppan	5.60254e-05	1.90662	24.4285	31.1358	26.275	31.9915	25.6405	23.4745	7.71144	6.34114	7.58438	7.27187	7.23922	7.3123
Mapk1ip1	5.66285e-05	1.27409	43.5714	39.1829	39.1462	40.7709	38.6455	36.9173	14.5966	14.9669	15.5094	14.8323	17.2976	21.3038
Scand1	5.71946e-05	1.95857	269.169	371.879	271.976	275.927	312.278	264.473	82.4369	74.8058	77.0535	77.8209	73.1527	69.0154
Gtf2f1	5.72262e-05	1.02835	63.9858	76.615	71.599	72.9676	82.1408	65.9529	36.5548	35.1798	38.3718	35.1472	34.3094	32.8522
Cdkn1c	5.72856e-05	1.74329	14.3962	16.7557	13.4073	15.8299	13.6872	12.1656	3.54786	3.31858	4.03473	5.59639	4.82667	4.43515
Cyp4f13	5.8284e-05	1.05758	7.32839	7.79801	7.56836	8.20995	6.20408	7.70236	3.66482	3.28755	4.08247	4.06708	3.50984	2.91721
Thpo	5.8407e-05	1.39715	3.47314	3.08511	3.42833	2.99959	3.18801	3.54245	1.04316	0.707692	1.08697	1.07037	1.62524	1.95255
Mt1	5.86235e-05	1.0646	469.238	527.298	502.292	520.936	616.316	509.478	233.534	233.325	286.742	288.839	266.541	194.928
Rps28	5.99298e-05	1.72788	301.123	388.604	300.152	322.288	391.045	349.609	100.662	103.544	117.99	110.431	96.0569	91.0523
Ubxn11	6.13136e-05	1.23404	5.7213	6.41972	5.64124	6.6574	5.33616	6.38729	2.53885	2.02151	2.43878	2.47587	2.74951	3.14928
Rpl41	6.1456e-05	1.75774	1590.25	2067.18	1517.96	1646.72	2065.93	1670.71	502.785	523.684	549.254	571.983	533.771	440.864
Hemk1	6.31024e-05	1.35992	10.9207	13.1301	10.0872	12.0119	11.8277	11.2207	4.79187	4.18693	4.98083	4.18107	4.00104	4.81813
Mrps18c	6.42753e-05	1.11486	16.1518	17.4076	16.001	14.4803	18.0885	15.5421	7.10895	8.22107	7.0564	8.12947	6.55261	8.02974
Atp5e	6.43729e-05	1.71277	686.273	873.35	733.485	711.732	901.461	686.07	262.553	224.975	257.035	245.459	219.281	191.711
Arhgap45	6.7123e-05	1.04836	3.76293	3.03127	2.58369	3.01185	3.92929	3.33282	1.88779	1.45849	1.34489	1.58583	1.75951	1.46548
Egfl7	6.75895e-05	1.15081	23.1796	24.715	25.0759	21.1155	28.4795	23.1427	10.89	10.2591	10.5685	11.6474	11.1433	11.1146
Rps21	6.7965e-05	1.54599	1229.72	1578.12	1192.95	1134.66	1420.47	1219.66	395.109	463.653	439.069	520.621	455.466	388.907
Spag8	6.81003e-05	1.64006	7.58064	8.82942	5.88502	7.75434	7.80774	6.46389	2.3137	2.27681	1.94163	2.04144	3.26359	2.38297
Rps18	6.84946e-05	1.41834	290.544	390.774	299.655	337.092	379.545	334.325	120.794	128.58	137.656	140.326	122.218	110.657
Fkbp2	6.86238e-05	1.11808	108.428	139.565	123.255	121.579	138.168	137.697	60.554	61.6441	60.4568	60.3367	55.8632	55.2875
mt-Co1	6.87875e-05	2.71793	83403.1	69531.3	66318.3	75109.7	49147.1	64912.5	8908.56	11995.3	10717.6	10443.6	9953.95	10057.9
Rpl13	6.95288e-05	1.18961	1198.68	1540.34	1220.99	1291.14	1493.66	1305.7	605.392	586.507	596.717	636.112	584.928	519.874
Npy	7.17801e-05	2.02626	140.103	162.945	106.24	123.461	142.644	115.326	33.3313	30.3846	33.4957	31.8366	38.1897	26.8762
Smg9	7.20579e-05	1.09104	20.0403	23.4386	20.9119	20.1634	24.125	22.2213	11.2565	9.76374	10.4685	10.7901	9.62396	9.54495
Siva1	7.22182e-05	1.09584	19.2531	22.593	18.1199	17.5204	17.7061	17.6439	9.46846	9.16857	8.73102	9.96352	8.96595	6.49433
Sst	7.38533e-05	1.1273	544.047	620.199	565.274	513.68	664.517	502.814	269.676	230.77	246.574	274.515	289.692	250.018
Nbdy	7.4838e-05	1.04426	22.5972	24.569	19.6843	21.0746	25.4184	24.5789	11.4001	11.8003	10.7596	11.7563	11.4711	9.69046
Crip1	7.49931e-05	1.71581	16.1226	20.4186	16.4183	18.9144	15.5915	14.2636	4.39452	5.01253	5.91115	5.14539	4.90139	5.60443
Fth1	7.5389e-05	1.22255	3288.97	3227.26	2922.54	2703.21	3800.14	3032.27	1426.31	1404.26	1400.74	1342.32	1349.82	1207.55
1190005I06Rik	7.55745e-05	1.20834	16.7987	20.178	17.1799	17.8012	19.8059	18.4181	9.03155	7.71819	9.16249	7.81303	7.97355	5.98414
Cox17	7.57725e-05	1.4157	32.8207	40.6252	28.8361	34.5707	36.3211	33.874	11.3398	12.5557	14.3941	13.9111	12.4424	12.964
Rpl28	7.68928e-05	1.5692	398.386	497.044	393.989	418.94	524.47	451.373	158.783	146.848	162.78	157.685	145.13	133.337
Rplp2	7.72544e-05	1.60825	394.474	513.333	401.957	432.891	540.817	433.053	150.603	143.639	150.741	162.36	146.907	136.757
Rps8	7.73288e-05	1.15573	565.111	724.85	585.133	599.459	726.839	649.868	278.695	286.825	300.279	305.417	296.872	260.51
Efcab15	7.73665e-05	1.56076	10.8018	12.0261	7.84073	10.1365	10.3448	11.41	3.4537	3.8206	3.49986	4.00075	2.85729	3.57398
Rps19	7.75432e-05	1.77452	261.937	341.925	264.651	287.4	359.993	278.893	89.0498	82.7732	92.184	96.7099	86.3122	77.5751
Bex1	7.77031e-05	1.10011	235.772	277.472	247.434	233.969	312.289	255.674	107.936	116.634	128.61	134.124	133.838	107.787
Rps27rt	7.84722e-05	1.21572	82.4664	106.656	74.4583	83.3939	98.6746	71.8954	34.2264	43.4914	34.1537	44.0318	38.5301	28.3993
Rps27	7.89497e-05	1.2595	496.447	659.847	478.68	547.546	610.876	504.2	220.451	239.312	232.499	237.217	230.644	217.243
Ccdc33	7.92408e-05	2.05306	1.20354	1.09872	1.29682	1.69249	1.25657	1.09202	0.288661	0.418295	0.341428	0.412765	0.17131	0.208612
Adck5	7.93088e-05	1.29131	10.0882	11.7541	12.7715	13.5712	13.4272	11.3352	5.18912	4.56249	5.08164	4.51314	5.20503	5.25333
Yjefn3	7.97508e-05	1.06079	22.4306	27.3642	27.4325	23.4172	27.385	22.1157	13.6647	11.916	12.9017	11.1693	11.6053	10.7181
P3h3	8.16212e-05	1.39267	25.0987	25.1047	27.0269	23.3109	25.8664	23.6908	8.64219	6.98788	7.5823	9.22577	11.3777	13.3504
Plac9a	8.19209e-05	1.68118	8.36098	10.0412	6.88787	8.41596	8.96306	7.64227	2.56457	2.41912	2.99478	2.29214	3.03606	2.3818
Arhgef1	8.2702e-05	1.24005	28.9864	25.923	30.1568	30.4292	30.7581	26.1953	12.4341	9.47277	10.5431	10.7305	13.7431	16.0838
Lsm7	8.51829e-05	1.34003	45.1393	56.7828	52.7631	50.3442	62.6948	55.1725	21.0686	20.9545	24.3552	22.0839	19.6702	19.4153
Rpsa	8.69363e-05	1.24833	461.449	602.163	455.089	481.999	595.061	493.785	214.144	228.023	216.782	231.064	219.751	190.737
Zfand2b	8.943e-05	1.56444	26.9531	34.79	25.8614	29.1586	32.3695	23.3059	10.4064	10.6415	9.85761	9.58578	8.90283	8.90875
Arhgap4	8.98973e-05	1.26334	1.45138	1.44614	1.79343	1.45176	1.21166	1.32683	0.651976	0.473697	0.673919	0.610447	0.490843	0.715531
Tmem256	9.04401e-05	1.35719	59.5176	78.5088	68.9485	65.103	81.2152	63.7341	26.6253	27.217	32.1725	25.9119	25.2516	25.6051
D8Ertd738e	9.14963e-05	1.46154	215.288	255.812	220.065	211.231	284.971	227.28	83.3308	78.4371	92.8108	91.1494	83.2344	84.7023
Pf4	9.28431e-05	1.89137	5.1836	4.12132	5.2529	6.97958	5.74786	4.89133	1.76968	1.12957	0.88358	1.62551	1.85043	1.41447
Rps5	9.44998e-05	1.0428	482.594	609.877	478.693	522.937	636.025	513.373	251.297	261.604	259.835	287.075	282.19	232.342
Cenpx	9.57605e-05	1.06141	17.9685	22.7792	19.1647	20.4016	21.3017	22.079	10.28	10.5143	10.6867	10.2577	8.89494	8.63619
Rpl39	9.69288e-05	1.15532	333.298	398.865	300.772	342.112	374.041	359.239	138.232	163.575	177.607	174.296	146.612	146.244
Lbhd2	9.81959e-05	1.41641	35.5782	45.4658	34.2824	35.9875	47.4851	39.992	14.3291	11.5486	14.7703	14.698	19.2926	14.8228
Ccdc107	9.84031e-05	1.26431	44.464	50.9552	36.6239	41.015	46.9249	38.8735	18.6803	16.7292	18.7844	18.3476	19.5327	15.6872
Snapc4	9.85045e-05	1.44699	13.8883	11.4306	13.7854	13.4242	14.3965	11.2309	4.34532	3.78841	4.90618	4.13171	5.10454	6.39032
Bola2	9.87814e-05	1.78625	93.0699	122.391	94.3699	96.1686	126.606	100.303	31.4635	30.5628	31.8815	34.0636	28.141	27.3838
Rtel1	9.89703e-05	1.21119	6.63451	8.17106	7.83204	7.61563	7.11359	7.08235	3.07953	2.58218	3.04027	3.36755	3.01005	4.11855
Rps11	0.000100789	1.32306	379.057	503.932	403.925	415.453	521.646	437.635	170.597	180.16	182.533	196.899	178.74	154.895
H2-Ke6	0.000101297	1.03935	52.9521	57.3563	55.4508	50.2959	65.5444	57.6466	27.7058	28.454	28.1645	29.7995	26.917	24.0183
Exosc4	0.000101449	1.28916	24.3581	31.3509	28.8191	26.697	33.2388	24.9486	11.1503	12.5266	11.2738	11.856	10.725	11.79
Rpl14	0.000101594	1.30485	345.206	454.584	336.293	371.924	417.437	334.293	151.424	149.244	150.256	170.618	152.039	141.075
Stk19	0.000101776	1.22574	29.4525	41.5791	36.4223	40.0293	42.944	40.2115	16.3007	15.1274	16.4693	16.6078	18.2457	15.8654
Amdhd2	0.000103175	1.20924	14.8118	20.7087	18.6879	20.7563	21.454	17.0681	7.54971	8.41596	8.85562	8.66365	7.77573	7.82207
Vwa5b2	0.000103413	1.2653	25.059	20.8942	26.7741	26.2323	25.2859	21.8679	10.079	6.87757	9.11398	9.89369	11.5067	13.314
Rplp1	0.000103463	1.61474	2653.52	3622.03	2732.55	2918.72	3636.31	3012.68	1053.98	1010.9	1052.81	1081.6	987.268	878.889
2310039H08Rik	0.00010386	1.00935	10.0528	9.18177	11.0665	9.91213	12.2738	12.2846	5.62218	4.48418	5.54065	5.43	6.37452	4.72501
Gm1673	0.000103862	1.58756	252.745	329.592	259.438	276.651	351.157	271.003	102.056	86.3367	98.0431	105.046	100.797	86.8744
Klhdc4	0.00010387	1.18141	20.7878	24.3611	23.9104	22.9885	29.4909	21.5977	10.1123	10.3439	11.1611	11.0741	10.5862	9.83412
Trpv4	0.000104901	1.19426	1.39393	1.32567	1.87018	1.43685	1.32014	1.91911	0.486348	0.557917	0.964499	0.723147	0.61517	0.702217
Il3ra	0.000105185	2.2315	5.31702	4.24961	3.82321	4.77199	5.10169	3.84665	1.06031	0.720905	1.17992	1.05628	0.570495	1.18483
Tcirg1	0.000106226	1.5595	19.4709	15.344	15.6687	17.4094	20.6514	14.2791	6.04555	4.84452	4.66016	4.8583	7.07341	7.40297
Cfap100	0.000106616	2.0518	6.02669	6.37262	4.84903	4.92201	4.91422	4.75387	1.10515	1.01002	1.40674	1.11244	1.62832	1.41624
Cfap65	0.000109928	1.44665	5.28974	6.54753	4.40252	4.88862	5.14302	5.58953	2.00201	1.8532	2.01687	1.45274	2.05864	2.30544
mt-Atp8	0.000111713	2.95534	64.0125	96.6486	78.1084	94.6468	94.8323	111.991	7.85456	14.3827	18.5401	10.0229	9.72148	9.13159
Atp5mpl	0.000112467	1.20777	184.46	244.229	202.131	196.893	250.493	220.292	83.5417	104.964	109.962	92.5623	88.2844	82.8553
Gstp2	0.000113738	1.38478	41.9716	50.2834	41.4186	42.8557	54.5413	54.2974	17.4885	16.9661	18.706	19.6766	19.5254	16.9183
Rps9	0.000115821	1.35122	398.155	509.611	402.899	400.636	525.428	430.441	169.956	168.205	184.679	188.757	179.97	153.856
Zbtb48	0.000116428	1.33127	10.5579	9.7528	7.87701	9.71002	10.8991	7.88013	3.8944	3.25546	3.87255	3.3358	4.35116	3.81511
Rps15	0.000117055	1.44714	1293.46	1657.83	1258.25	1384.72	1726.81	1415.1	527.873	530.763	577.059	578.025	523.004	467.25
Mrpl52	0.000117291	1.24055	118.754	158.919	137.795	129.518	168.883	136.653	59.132	67.6936	62.6009	61.5593	57.2686	51.697
Mien1	0.000117956	1.30708	44.7169	61.0398	53.4256	52.1828	61.979	55.7447	23.3231	20.9477	22.3017	22.6802	20.372	23.3728
Enkd1	0.000118412	1.47363	13.4186	13.1109	12.163	12.2951	15.7359	10.7779	4.31228	4.28631	4.18466	4.39363	5.00815	5.72139
Acad10	0.000118458	1.21545	2.46345	2.6775	2.23635	2.88716	2.56479	2.27362	0.862639	1.02198	0.91238	1.09187	1.22754	1.38746
Lrrc51	0.000119128	1.4886	11.4953	14.4931	11.0007	10.6728	10.0637	10.0986	4.05247	4.20087	4.44488	4.15476	4.63883	2.67802
Tmem160	0.00012005	1.70892	95.7983	121.863	102.718	109.675	136.759	114.052	41.8245	35.275	38.6471	33.4574	33.0366	26.0282
Adcy4	0.000121297	1.01568	2.50988	2.01337	2.22788	2.11036	2.18924	2.40409	1.09651	1.24748	0.976086	0.948844	1.31359	1.07217
Cep89	0.000122185	1.16755	12.7654	10.2865	9.47395	9.74982	11.2113	9.51257	4.71521	3.94283	4.27051	4.71667	5.11706	5.28369
Arf5	0.000122727	1.16864	173.383	217.593	205.883	211.984	239.644	192.358	97.8431	93.2704	101.542	92.189	84.2208	82.9137
Rab25	0.000122746	2.33508	0.533509	0.813926	0.618827	0.623671	0.607557	0.46044	0.084065	0.11498	0.218987	0.219013	0.087901	0
Ankzf1	0.000124198	1.15322	11.6444	10.1926	12.5373	13.4026	13.5647	11.9376	5.79505	4.78083	4.6588	4.572	6.15533	6.98589
Fkbp11	0.000124777	1.48199	9.40636	13.2768	11.1213	15.5793	9.51114	13.9515	3.12929	3.96272	4.28653	5.43984	3.82355	5.43666
Nenf	0.000125474	1.58318	334.604	460.35	347.584	361.543	462.17	372.798	128.309	120.949	132.428	148.582	135.982	114.395
Car15	0.000125804	1.0015	3.33879	3.25778	3.93592	2.82	3.07371	2.9625	1.60922	1.78283	1.82351	1.032	1.47232	1.9644
Sema6c	0.000125809	1.04241	17.0516	18.1851	17.6318	17.4527	20.6856	15.0838	8.95123	7.40344	8.12165	8.89452	8.91981	9.21783
Ryr1	0.000125863	1.47783	1.51395	1.86591	2.00382	2.11505	1.4156	1.92269	0.69238	0.776316	0.561131	0.630407	0.477287	0.753275
Rpl32	0.000127216	1.31205	450.947	605.601	491.704	494.436	625.136	526.583	210.217	215.938	231.267	231.01	212.905	185.205
Aif1	0.000127232	1.49765	5.88856	7.8596	7.50993	9.00662	7.94311	6.51071	2.55734	3.35792	2.5537	2.4088	2.62947	2.32895
S100a6	0.000127579	1.89252	28.9459	44.0481	29.168	34.5577	37.2914	27.5106	7.3095	9.3386	8.16958	11.0152	10.1836	8.26054
Fau	0.000129394	1.30366	694.164	865.427	703.188	702.443	927.854	726.504	316.875	307.081	313.839	347.294	314.401	271.885
Hdac10	0.000130677	1.35403	8.19806	9.09831	9.11814	7.94184	9.6313	7.12602	3.11795	3.11503	3.78742	3.26014	2.84384	3.87114
Cfp	0.000131772	2.07249	25.1255	17.6127	18.244	17.1903	25.4638	18.4022	4.78694	3.54617	3.84165	3.68242	5.98468	7.17257
Apoc3	0.000133649	2.50849	4.17483	5.10773	3.31199	5.0787	6.2804	5.79299	0.458127	1.08612	0.689527	0.979328	0.771774	1.24276
Elob	0.000136301	1.20108	352.304	423.084	358.435	344.575	444.086	355.237	175.029	160.45	180.907	172.837	154.581	146.888
Ccdc189	0.000137276	1.03512	6.26754	6.90575	6.44293	5.34739	6.92819	5.89976	3.79912	2.851	2.83628	3.22051	3.50065	2.23379
Rex1bd	0.000138356	1.18876	107.39	123.905	110.593	107.91	133.971	107.068	57.309	50.8306	53.3594	54.7174	43.3076	43.5328
Ghrh	0.000140005	1.16792	18.4459	19.8934	18.2384	19.4511	17.5112	16.3174	6.29742	7.56709	6.64237	9.29115	11.1901	7.90519
Rbp1	0.000140483	1.70314	26.8323	31.607	20.8439	25.274	28.2734	21.7232	7.06504	7.0385	7.5848	8.85416	9.21902	7.7046
Gm9780	0.000142152	1.84558	15.0973	20.5286	13.7779	15.0695	17.7511	15.8854	4.80445	4.2097	5.61999	4.07273	4.504	4.08754
Il17rc	0.000143832	1.14829	5.78473	7.38699	6.95962	6.18515	6.65582	6.09985	2.72863	2.49799	2.58268	2.94551	3.63747	3.23546
Lyl1	0.000146665	1.45869	2.6539	4.7094	3.66888	4.53817	4.59358	3.44768	1.18739	2.01932	1.17762	1.22708	2.0643	0.91475
Vamp5	0.000147101	1.23958	2.88563	4.2713	3.2238	3.02433	3.7995	3.05187	1.22985	1.48133	1.54972	1.28394	1.61494	1.41872
Etfb	0.000147109	1.17278	83.9783	105.98	91.3869	78.701	104.964	79.9973	38.4895	39.7602	44.5917	42.5583	40.6862	35.6618
Ndufb7	0.000147615	1.60689	294.045	373.847	327.569	316.233	430.266	334.745	119.18	114.815	124.659	123.997	104.65	94.4903
Mobp	0.000147872	1.28669	672.766	501.078	505.638	524.432	530.225	613.358	222.833	252.108	241.464	225.222	212.237	218.242
Psmb6	0.000148032	1.12404	233.793	289.329	253.522	257.109	324.49	263.304	128.263	127.041	127.179	134.37	123.464	103.66
Chia1	0.0001502	1.68527	3.5893	5.89273	5.13833	4.81697	3.93437	5.58399	1.44954	1.5534	1.33913	1.41356	1.25005	1.99794
Osr1	0.000150468	1.17709	6.90325	6.75101	5.04272	7.32454	5.91984	6.47706	2.32346	2.35099	2.408	3.3646	3.17399	3.36926
Csf2ra	0.000151319	1.17601	19.7706	19.62	23.6619	19.1118	18.4996	18.9716	7.94512	7.63711	8.45122	8.09398	9.27401	11.5461
Gm867	0.000151395	1.81415	3.45609	4.62627	4.99237	3.68807	4.73997	4.0473	1.60897	1.2676	1.14004	0.980244	1.12159	1.14728
Rpl13a	0.000152568	1.4879	676.917	910.191	712.445	739.158	968.662	781.427	286.828	285.414	295.5	314.032	281.527	244.059
Smim4	0.000154039	1.05883	6.85427	8.63887	8.53896	7.89004	9.59454	9.9175	3.38381	4.21838	4.87662	4.22403	4.0135	3.97311
Oxt	0.000156144	1.83761	2334.22	2624.81	1773.33	2121.74	2560.92	1764.82	554.508	466.236	528.517	777.41	794.288	566.552
Mical1	0.000157535	1.07406	7.39214	9.31645	6.83112	6.38229	7.69097	6.35498	3.61621	3.86798	3.21062	3.43086	3.4201	3.33813
Tarbp2	0.000157762	1.11564	11.9365	14.3541	14.8455	16.3123	16.0908	11.4953	7.00816	6.1469	6.95471	7.0358	6.54863	5.54812
Ptpn18	0.000159719	2.47769	1.48828	1.58842	1.2315	1.91839	1.04919	1.62073	0.332891	0.210883	0.273845	0.294945	0.219841	0.264799
Pdlim2	0.000160687	1.6219	27.9157	31.6239	32.3012	34.3106	39.668	38.84	11.0755	12.0424	12.3293	12.3047	9.2793	9.4642
Plac9b	0.000160994	1.83576	16.1959	20.8023	13.9968	14.7084	17.6045	13.8194	4.6905	3.94292	5.07625	4.03438	5.34658	4.11909
Mtg2	0.000161859	1.01509	15.1974	13.7004	15.9458	13.792	15.0084	11.7229	6.99242	6.80286	7.25497	5.76069	7.57651	7.85195
Rps16	0.000162501	1.24385	182.112	238.405	198.23	202.034	251.537	207.678	88.5472	85.838	99.2975	98.6285	86.7234	81.435
Pheta1	0.000163025	1.0132	13.6542	13.59	12.8056	13.8835	18.3272	13.7656	7.21164	6.21684	7.01276	6.66451	7.75329	7.76218
Ltc4s	0.000163626	2.01824	2.16176	2.58828	2.33306	2.08867	2.46455	2.7791	0.968659	0.189271	0.396524	0.693308	0.50643	0.804392
Wnt6	0.000163858	1.36564	10.9991	7.21733	6.87705	9.38542	11.1421	9.1916	2.96584	2.23623	2.53204	3.5263	5.31631	4.69398
Galk1	0.00016521	1.22909	19.8215	24.17	23.1885	25.6203	28.9767	22.6767	10.1322	10.3035	10.3282	11.6243	9.09752	10.1364
Myl6	0.000167958	1.062	198.917	253.212	212.953	217.999	280.828	233.307	106.32	112.337	117.094	115.211	113.295	104.963
Hdhd5	0.00016906	1.00397	23.1592	20.3124	27.5905	24.6422	26.9636	23.8199	10.2803	11.8054	11.6883	11.3957	12.7929	15.0797
Rps14	0.000169707	1.38441	531.865	688.337	546.318	557.553	745.582	578.987	232.271	237.099	243.593	259.417	231.424	193.799
Pih1d1	0.000170972	1.23531	22.8026	31.3123	24.1998	27.7289	29.3574	24.3488	11.2133	11.6846	13.454	11.4095	10.1463	9.94642
Vamp8	0.000171988	1.42656	10.5764	12.6014	9.03745	8.95926	10.8151	9.07978	4.1766	3.28704	4.0378	3.90312	4.48396	2.8303
Hint2	0.000172131	1.32706	30.8922	42.7325	35.1149	33.8861	41.4739	31.1879	12.8369	13.2394	17.2176	15.046	14.2988	13.1705
Snrpd2	0.00017248	1.24882	97.4562	130.329	109.759	112.202	136.212	101.006	49.7255	48.4243	53.5558	51.7499	45.9323	39.6811
Prr18	0.000174705	1.1482	78.0823	66.9735	64.509	64.7879	80.4838	80.3005	36.7917	35.7161	33.5409	32.3962	28.8898	28.9944
Igfbp6	0.000175734	1.64553	40.9922	46.2694	34.2793	37.6664	44.8808	30.6778	10.5831	9.95483	9.06864	13.0976	18.2492	14.0845
Traip	0.000175994	1.23412	5.44337	5.56112	7.26489	5.00956	5.69663	5.64313	1.98699	2.13007	2.50852	2.23919	2.5775	3.27424
Zfp821	0.000176482	1.16403	29.4394	31.2086	26.1762	30.221	33.5661	24.3841	12.2102	11.5853	12.5672	12.4831	14.1847	15.0639
Trmt112	0.000176558	1.08975	104.547	138.738	126.785	112.412	130.077	127.193	59.6236	52.0538	59.3597	63.6221	63.1319	49.7759
Atp5j2	0.000177465	1.07064	210.1	260.135	218.491	211.274	275.873	220.983	109.626	112.59	118.292	116.651	107.087	100.809
Uqcrq	0.000178488	1.26895	138.761	196.33	177.499	157.792	191.672	165.176	77.5504	75.1555	77.1058	74.7536	63.9487	57.7463
Vill	0.000180246	1.38341	3.4631	3.74775	2.49112	3.16879	2.9117	3.23064	1.31923	1.01997	1.02891	1.5008	1.3629	1.05615
Ap2s1	0.000183841	1.1542	293.512	403.552	341.053	316.261	391.514	335.708	159.85	161.557	161.763	171.066	144.919	136.14
Apoc1	0.000187982	1.70088	20.6952	22.1009	19.2922	14.6824	22.798	16.8968	6.3355	6.16777	5.4851	6.75917	5.55297	5.52417
Arl6ip4	0.000191001	1.04307	60.2866	68.6204	56.9659	60.309	77.2947	60.5372	32.573	30.9417	30.6959	34.5188	30.3727	27.2573
Znhit1	0.000191462	1.07489	63.8755	74.4796	66.0632	61.2115	85.5626	66.2701	33.0984	33.8404	35.9632	32.5168	32.6826	30.0714
Setd4	0.000192649	1.19895	2.13033	2.67548	3.29853	2.73552	2.83739	3.34496	1.18255	1.05703	1.19749	1.18829	1.37583	1.41354
Use1	0.000193186	1.40414	117.563	163.618	132.77	133.191	171.16	134.639	54.7599	54.7697	54.3328	61.1176	50.6612	46.6371
Psmb10	0.000193926	1.10923	50.563	66.6267	55.16	60.475	67.0947	57.7162	28.6184	28.9873	29.3057	31.8773	23.4112	23.5791
Mapk11	0.000197488	1.07732	20.5791	19.7923	23.0412	23.6797	28.0175	21.9543	11.1223	10.2868	11.3796	8.99667	11.2931	11.8775
Mroh3	0.000200155	2.27247	0.320419	0.422174	0.407627	0.353042	0.295388	0.40968	0.109391	0.055245	0.08768	0.040473	0.105584	0.058697
Lgals1	0.000208364	1.61602	30.193	34.5141	24.8122	30.6499	38.6555	26.0899	9.20279	7.75562	9.23187	11.4324	11.5054	11.1974
mt-Nd1	0.000210434	2.78316	36673.7	28770.5	30561.1	35948.1	18739.3	29769.4	2977.95	5304.95	5164.42	4583.9	3764.26	4420.74
Ndufs6	0.000211426	1.26312	135.599	178.378	149.482	136.701	179.49	150.33	69.812	65.0348	73.1463	64.067	56.9555	58.4521
Crocc2	0.000218522	1.06252	1.68529	1.71994	1.27517	1.09236	1.33752	1.5988	0.796091	0.776063	0.701322	0.556948	0.699988	0.639453
Pip5kl1	0.000221835	1.13703	4.76234	3.89978	5.2199	5.63702	4.99522	5.00868	1.94578	2.33049	2.13708	2.16052	2.00707	2.84295
Amy2a5	0.000222114	2.52881	0.284877	0.238471	0.290335	0.163503	0.315589	0.304399	0.013894	0.060811	0.028955	0.033413	0.050847	0.08884
Uqcr10	0.000227607	1.3544	344.877	473.067	373.58	380.402	484.596	392.761	166.735	160.876	177.466	165.825	146.803	140.206
Asl	0.000227668	1.08304	18.0777	22.4265	16.4231	17.1546	20.4405	17.0421	8.82186	8.00666	8.96956	8.83158	9.43933	8.593
Ccdc57	0.000229159	1.66808	5.93094	6.73042	6.01214	7.59186	5.53132	5.65638	1.86164	1.7277	2.01166	1.48682	2.07636	2.62122
Itga2b	0.000230113	1.22661	1.59856	2.02003	1.85177	1.8594	2.38903	2.0331	0.776033	0.869855	1.05515	0.807959	0.885662	0.627142
Mbp	0.000230124	1.37322	1687.99	1382.43	1346.2	1347.31	1848.91	1665.47	660.1	650.039	619.49	588.487	537.772	525.795
Prxl2b	0.000230672	1.33446	175.104	215.847	174.506	188.186	250.901	191.734	79.3037	79.1374	81.5603	92.6844	79.5829	62.1037
Ndufb1-ps	0.000235312	1.00386	74.2416	73.3639	72.5416	65.3405	78.1096	82.2464	29.8868	44.408	44.0797	36.7289	35.4889	31.7336
Dapk3	0.000237224	1.2616	57.4831	69.1657	67.9904	59.2962	77.7847	57.8052	31.1946	24.5595	28.4771	28.9465	24.6783	24.6081
Tsnaxip1	0.000238813	1.54792	2.08943	1.8529	1.51345	1.58289	1.48899	1.55716	0.709454	0.483592	0.88467	0.316991	0.486444	0.567895
Ager	0.000240334	1.78744	2.68712	2.78807	2.30174	3.38307	1.98368	2.42281	0.640436	0.416675	0.937868	1.22104	0.850649	0.442712
Ecm1	0.000243526	1.2619	11.4771	9.18403	7.95373	10.488	11.4956	8.53628	3.86985	3.42512	3.64701	3.59981	5.23413	4.88291
Krtcap3	0.000244168	1.46605	2.5253	2.10333	1.54879	2.04254	2.35109	2.60058	0.674715	0.799803	0.64446	0.946524	0.852482	0.849781
Uqcr11	0.000244986	1.61692	314.445	400.842	354.93	334.915	465.739	392.824	128.516	122.12	139.073	139.59	106.553	102.181
Col26a1	0.000247207	1.38877	4.00074	5.39513	5.70194	4.76246	5.37093	3.72514	1.86329	1.9558	1.99424	1.81133	1.63976	1.79376
Mycbpap	0.000252165	1.07723	5.17256	4.21359	3.84645	4.16568	4.23227	3.63412	2.1347	1.55203	1.85484	1.94433	2.18761	2.30037
Morn2	0.000252824	1.21256	34.8227	52.3644	38.7229	38.1185	47.8191	40.3958	17.0896	19.1875	17.1879	20.3706	18.0766	16.9311
Ssc5d	0.000253674	1.37594	1.64008	1.80766	2.28335	2.28378	2.23682	2.02287	0.825043	0.506591	0.649405	0.642346	1.09854	1.00749
Rcn3	0.000255405	1.47999	16.7107	20.0069	16.8296	13.577	19.7105	14.5544	5.01184	5.27921	4.89725	5.76805	7.87167	7.51908
S100a10	0.000257356	1.06317	58.5965	65.9952	54.2232	59.536	68.3752	48.5284	28.0282	29.1195	22.2979	29.072	28.8025	32.6974
Ndufv3	0.000271231	1.15249	37.7378	53.0822	42.4394	43.1624	52.9739	45.5768	21.2435	20.3138	22.5319	21.123	20.3343	18.1491
Ppp1r14a	0.00027333	1.22418	51.2256	56.848	58.1188	53.514	66.5071	59.01	29.9424	25.1819	29.5079	23.6546	19.8394	19.644
Bst2	0.000273574	1.40586	12.8362	19.6972	16.9396	16.7288	16.7015	14.7147	6.57342	6.16071	4.64572	5.384	7.53083	6.54568
Zfp428	0.000275127	1.42708	50.0218	73.3786	53.2151	56.7909	70.2141	57.0204	23.6033	22.025	22.8716	22.129	20.9219	22.5655
Gfap	0.000276423	1.01807	196.112	208.666	175.721	192.935	242.326	150.739	90.3274	85.4139	78.1691	112.967	115.286	93.8241
Irf7	0.000277321	1.3668	2.56863	3.43514	3.53144	3.14819	3.38964	2.80514	0.717488	1.4869	0.815582	1.15903	1.40952	1.73148
Rbp4	0.000281593	1.02002	15.404	14.5801	10.6231	13.9814	15.1978	13.8233	5.18847	6.98095	5.42637	9.02706	7.6355	6.97035
Dok3	0.000281752	1.73797	12.7983	10.8053	10.8402	7.46977	13.6632	9.97396	3.04545	3.33236	2.91162	1.92537	3.54554	4.89113
Cops9	0.000284442	1.21816	103.429	128.746	115.37	107.787	137.644	122.94	54.7166	53.66	57.8481	57.2336	43.5899	40.6738
Smdt1	0.000288471	1.28353	266.185	345.708	279.932	279.424	359.077	301.172	129.97	113.907	144.865	137.93	117.283	108.403
Rsph10b	0.000288957	1.69871	3.6279	6.06171	5.44004	5.77084	4.04493	5.00372	1.55479	1.4802	1.86722	1.54916	1.39612	1.37866
Col2a1	0.000289116	1.70718	3.09245	2.50823	2.71984	2.98199	2.13413	2.27495	0.616884	0.584329	0.796289	0.867241	0.871276	1.07577
Bmyc	0.000290327	1.07548	51.2223	71.127	68.7183	62.3431	69.5992	67.1158	33.0002	26.4646	36.2228	31.4847	28.6813	29.266
Flywch2	0.00029252	1.17952	34.0528	45.7512	34.2599	38.9775	44.0617	41.5361	16.7129	16.3595	18.8457	21.4153	17.7465	14.2789
Cchcr1	0.000298631	1.08619	1.73457	2.28392	1.65944	2.42896	2.52681	2.26104	0.89933	0.871132	0.9755	0.975027	1.2641	1.0884
Bcas1	0.000302158	1.13347	173.57	147.141	142.135	144.143	176.632	182.992	77.5408	85.1967	77.9782	69.4979	65.2524	65.134
Actn2	0.000302383	1.17655	4.5719	4.57383	5.32937	5.54645	5.15972	6.22394	2.58576	2.68427	1.92576	1.88015	2.23579	2.58222
H2aj	0.000302573	1.37394	36.2763	45.4184	41.0058	37.6136	52.8184	44.1258	19.1344	16.4757	17.933	15.5468	14.7063	15.4635
Selenoh	0.000305442	1.13288	41.8351	57.9595	44.8511	50.5817	61.0107	48.1916	22.1813	19.7321	23.3457	27.0401	25.557	20.9651
Ifitm2	0.000310741	1.17848	40.6247	41.0968	30.2022	38.5857	35.6768	30.8367	15.0119	13.4945	13.0557	17.2771	19.7756	17.2694
Ttc41	0.000313324	1.34347	1.4914	1.11048	1.29937	1.32071	1.25767	1.13552	0.502719	0.354378	0.574197	0.30612	0.561039	0.702468
Atox1	0.000313645	1.30414	132.837	176.983	154.422	149.815	190.411	135.404	66.3085	66.0307	64.8678	71.0515	54.1206	58.2329
Tnni3	0.00031663	2.76582	4.53928	4.80145	3.67016	6.66046	3.88272	4.40123	0.599221	0.678284	0.882749	0.645992	0.583353	0.720668
Fxyd2	0.00031738	1.42574	2.402	2.15949	1.68093	1.58455	2.53307	2.33348	0.998797	0.608793	0.75436	0.77917	0.89017	0.693594
Fxyd5	0.000327246	2.13588	18.4467	19.7746	12.6899	13.8175	15.712	12.0861	3.14431	3.25436	3.17706	3.32257	4.06348	4.09071
Spocd1	0.000334295	1.67212	0.47691	0.345356	0.425926	0.458864	0.479507	0.321627	0.096089	0.070094	0.241966	0.115541	0.142337	0.121021
Tmsb10	0.000337041	1.39409	365.115	476.269	362.074	357.394	511.155	379.606	165.344	157.861	164.995	160.383	148.166	136.052
Jund	0.000339407	1.08348	157.942	223.369	181.946	180.624	209.528	171.874	99.6098	84.1464	92.6416	91.0181	88.9054	74.6871
Rpl27	0.000345971	1.18528	110.773	143.799	122.073	120.622	160.482	126.631	58.8116	57.2695	61.0885	62.8466	53.4611	51.4463
Dock6	0.000346373	1.30785	12.7257	9.7914	9.77803	10.4162	10.9097	9.6713	3.74862	3.03252	3.38857	3.92192	5.25304	6.22053
Tomm6	0.000348576	1.10926	143.439	154.061	138.294	130.433	182.504	157.125	73.6391	72.1221	67.7492	80.0987	66.8866	59.3965
Ptgds	0.000350067	1.17677	5238.13	5409.82	3809.7	4369.88	5708.51	4133.79	1959.5	1808.86	1620.66	2374.37	2587.71	2330.78
Odf3b	0.000350582	1.51591	9.95345	14.3881	10.2105	10.1137	9.58512	9.51558	3.68683	3.57243	4.00365	3.29375	4.20342	3.53745
Flt3l	0.00035411	1.63628	3.53559	3.86525	3.647	5.35243	3.71497	3.80585	1.11508	1.08177	1.26971	1.16112	1.73092	1.33647
Mrpl54	0.00035726	1.13692	75.7611	101.131	81.4142	80.8018	109.142	76.2423	40.8482	45.9588	40.6935	43.6715	38.0209	29.3084
Aldob	0.000358307	2.00653	3.97143	5.71697	3.8328	4.32794	4.25529	3.5063	0.895506	0.76737	1.40529	1.33194	0.970214	1.00347
mt-Cytb	0.000358611	2.64953	39273.8	28040.7	30814.4	35378.1	18037.6	33240.9	3627.69	5653.47	5590.43	5200.5	4136.63	5240.96
Gpr15	0.000361248	1.32247	0.492012	0.396024	0.512836	0.552494	0.464535	0.372391	0.359942	0.07877	0.26254	0.259686	0.11291	0.041846
Polr2f	0.000364643	1.12173	106.396	133.207	118.714	100.25	139.531	108.697	55.5636	53.1185	62.0105	57.8745	48.8491	47.3856
Rasa4	0.000368827	1.28935	11.4467	9.70066	8.18118	9.38744	9.15361	8.57134	3.47368	3.33446	3.61132	3.37949	4.06144	5.23162
Acaa1b	0.000372141	1.05132	4.02481	4.63622	3.91547	3.5693	5.0927	3.94529	1.74401	2.12035	2.22108	1.93467	1.87885	2.25285
Mzf1	0.000372281	1.15283	2.8115	3.12067	3.53287	3.99638	3.74725	3.10325	1.60774	1.431	1.3252	1.59178	1.38001	1.79939
Stag3	0.000377986	1.14094	0.393969	0.383958	0.50757	0.535662	0.399714	0.365027	0.207204	0.131262	0.176133	0.240409	0.233764	0.183839
Crip3	0.000381438	1.64301	3.59062	2.04941	2.85234	2.47169	2.74096	3.99937	0.761614	0.785745	0.476157	0.296544	1.27419	2.07446
Mt3	0.000383084	1.50607	741.05	907.7	837.37	758.46	1126.34	949.94	330.539	282.683	379.988	316.826	292.486	270.794
H1f10	0.000383091	1.06908	51.0132	61.3794	61.6341	54.0042	69.6323	50.1314	31.2591	25.4153	29.9923	26.8315	25.6637	26.6054
Inmt	0.000383945	1.11697	2.714	2.82631	2.07125	4.68353	4.42858	2.71248	1.05436	0.734167	1.22348	2.36273	2.55573	1.03077
Tcp10b	0.000388699	1.70246	0.272278	0.200829	0.296988	0.294012	0.340269	0.287997	0.135208	0.046233	0.096859	0.060967	0.053017	0.127718
S100a11	0.000389298	1.59036	39.3011	50.0551	34.3477	35.1434	31.4951	28.7689	11.3635	13.8157	10.1567	12.3887	12.3573	12.6826
Tgfbr3l	0.000391096	1.98272	8.90357	10.2187	11.344	14.1679	8.98989	8.25884	2.33369	2.01709	2.67689	2.73538	2.74776	3.14629
Gm5415	0.000400214	3.54996	0.237388	0.188827	0.135847	0.278069	0.23626	0.243708	0	0.031299	0.014902	0	0	0.066509
Psmb8	0.000401388	1.46485	4.23083	5.03948	3.38859	5.73417	4.00674	3.72795	1.37479	1.48527	1.70452	1.88329	1.6013	1.41623
Sec61g	0.00041054	1.10048	25.8353	35.7342	26.4106	29.7221	37.711	32.7628	12.7146	15.1123	16.4315	14.9642	14.7553	13.7802
Pitx1	0.000412894	2.40303	1.85047	2.54518	1.45044	1.99482	2.52704	1.38409	0.357389	0.225155	0.146702	0.338583	0.713422	0.440677
Gpx4	0.000421552	1.02763	316.528	431.922	370.191	347.55	454.797	387.311	194.736	194.016	204.561	197.232	185.867	155.84
Abcc6	0.00043349	1.15557	0.567979	0.611833	0.702394	0.701219	0.651509	0.750053	0.113387	0.264321	0.441771	0.272682	0.433005	0.263644
mt-Nd5	0.000439168	2.60095	9820.12	6548.58	8507.96	8753.28	4565.71	9008.49	850.561	1484.43	1397.14	1383.46	1088.53	1576.53
mt-Co2	0.000440336	2.62664	31823.5	21717.3	24495.7	28177.2	14302.7	25366.8	2960.02	4650.43	4544.95	4169.21	3314.48	3982.43
Romo1	0.000441457	1.10992	128.388	161.59	130.671	136.411	175.666	148.723	67.2124	66.2372	76.9035	75.6384	63.2965	59.106
Prr22	0.00044878	2.3247	3.95703	3.31484	3.28663	4.24504	1.77638	3.46698	0.49704	0.815799	0.537831	0.735584	0.459753	0.955677
Pglyrp1	0.000449389	1.3126	10.9873	10.2529	10.9317	12.9429	16.8036	10.8386	3.53405	3.76523	6.03243	4.82727	5.8347	5.29797
Nek3	0.000451142	1.3916	5.28545	5.89506	5.5843	3.78747	4.51028	4.55094	1.71213	2.75504	1.1806	2.05874	1.48749	2.09295
Catip	0.000457855	1.38431	5.21894	6.6013	4.56274	6.21677	4.55846	5.34524	1.43639	1.8809	2.40454	2.13301	2.10516	2.49119
Pgls	0.000460626	1.2774	43.9079	65.7015	54.9818	55.2562	72.5583	56.542	24.4495	23.6889	23.2117	25.9818	23.4457	23.177
mt-Nd2	0.000463845	2.52257	18395.2	11515.4	14070.8	14723.7	9036.24	17290.3	2004.44	3061.12	2866.42	2336.38	1882.63	2647.29
Copz2	0.000467699	1.0793	13.8357	13.4948	16.1418	13.3936	14.004	8.99328	5.17212	5.11078	7.69901	7.67879	6.42906	5.70625
Gng13	0.000472635	1.83104	20.7513	27.8787	23.7926	29.3044	35.1239	27.8847	9.31566	7.55059	9.20353	8.24213	6.8546	5.13434
Rec8	0.000475354	1.50091	16.9602	15.82	14.4792	16.2639	22.0706	11.5495	4.67944	5.21081	5.2207	6.55508	6.83286	5.82491
Ndufb9	0.000475578	1.18188	349.73	431.119	406.145	402.291	515.807	443.029	197.408	206.299	215.82	185.96	162.488	155.176
Aspg	0.000481504	1.67831	5.93458	6.50929	5.84944	6.34732	4.16224	3.82363	1.64636	1.78199	1.66913	1.76921	1.42372	1.90369
Pbx4	0.000483825	1.11352	12.482	14.375	9.62327	11.4304	11.8957	11.4757	4.92187	4.89596	5.69468	5.8414	6.667	4.92323
Tekt2	0.00049271	1.11773	3.42589	4.25291	3.05964	3.80638	3.52373	3.29058	2.07076	1.34273	1.09884	1.62924	2.1853	1.51579
Pgf	0.000494086	1.0288	6.40855	7.64479	6.1991	7.73232	8.04496	5.52735	3.03986	2.661	3.60709	3.60056	3.98295	3.4764
Fhad1	0.000497373	1.39883	7.53165	10.2652	6.74088	7.59272	7.96435	6.22611	2.40095	2.64297	2.8685	3.55949	3.63974	2.45501
Lgals3	0.000497534	1.14839	1.424	1.95616	2.29567	1.97572	1.93605	1.53849	0.694506	0.790333	1.01314	1.00212	0.566434	0.952758
Epcam	0.000497977	2.27409	1.59569	1.59374	1.12796	1.40769	1.9787	1.03038	0.305696	0.102922	0.318533	0.518386	0.368822	0.191368
Zswim7	0.000499619	1.29443	17.6593	26.9054	22.0354	29.2233	24.2432	22.186	9.48403	10.3775	11.2783	9.43974	11.7601	5.65646
Znrd2	0.000503301	1.05757	39.464	53.8542	39.7119	41.4422	47.4704	40.401	22.3933	21.679	22.4234	24.826	17.2707	17.4484
S100a13	0.000507382	1.30995	53.0745	78.3144	54.6841	63.0128	75.726	55.8391	27.1794	26.9359	28.5088	23.2635	24.2681	23.3736
S100a4	0.000507976	2.33168	6.17007	7.77943	4.36543	8.00417	5.33827	4.73335	1.28155	1.16051	1.33537	1.34616	1.38624	0.719269
Pkn3	0.000518002	1.07379	1.00455	0.70512	1.10408	0.811726	1.16768	1.03242	0.38484	0.49844	0.458286	0.289611	0.615919	0.520456
S100a8	0.000518784	2.32349	4.14783	3.17836	3.53076	2.88002	2.85098	3.49025	0.106205	0.929686	0.663989	0.595959	1.22157	0.49389
Anxa2	0.00051905	1.0274	30.3299	35.7893	21.835	24.8078	28.5969	25.8953	12.3133	14.6204	10.3382	12.3325	16.3488	16.1004
Rsph9	0.000524927	1.18507	36.118	49.5219	40.0914	39.7887	47.8353	34.3511	15.717	14.8549	16.5906	22.8247	20.126	18.8285
Neurl2	0.000526047	1.87881	6.24474	5.00409	5.57772	7.84622	6.06287	4.1883	1.23429	2.08725	1.7538	1.769	1.17328	1.47845
Smpd4	0.000528165	1.26012	21.7651	17.9703	22.3049	18.5178	19.2693	16.5085	7.90588	7.2695	6.69893	6.59977	8.99872	11.0984
Alkbh3	0.000528694	1.11832	4.19695	7.604	6.83413	6.63238	5.42623	6.41733	2.6278	3.13259	3.10556	2.94105	2.73015	2.55725
Npff	0.000530849	2.82769	5.19781	7.74176	4.56194	7.34248	5.07822	5.2119	0.520786	1.01307	1.1456	0.278318	0.242022	1.7491
Cebpzos	0.000534688	1.18184	10.6567	15.7592	10.8779	10.2336	11.2689	11.4524	4.38195	5.44193	6.55481	4.93502	4.80679	4.84436
Amy2a2	0.000541656	2.22831	0.216932	0.122227	0.138495	0.149205	0.215058	0.202823	0.02083	0.022792	0.014469	0.038961	0.02904	0.096865
Spa17	0.000542953	1.21662	10.3825	15.6698	10.5166	11.2891	9.62206	11.7311	3.82338	5.49096	6.47389	5.61904	3.78963	4.58391
Mgp	0.000545499	1.84966	332.598	288.975	233.932	352.437	284.552	203.39	57.1788	59.8195	55.7008	86.4751	118.482	92.8805
Pmvk	0.000547888	1.05962	51.6318	63.1882	52.4043	51.693	67.8042	60.4956	30.3427	29.7723	31.0203	27.5723	23.1417	24.7317
Fam183b	0.00055013	1.16418	32.1753	40.0634	25.5079	29.9025	34.1648	28.9746	10.5143	13.4472	12.5209	17.4044	17.2764	13.97
Aspdh	0.00055516	1.7703	3.0975	2.6896	1.81171	3.04722	3.13479	2.98487	0.778517	0.6176	1.07485	0.702092	0.814042	0.927719
Pnldc1	0.000557414	1.67944	0.924799	1.02006	1.28072	1.12889	1.47265	1.51907	0.423445	0.182896	0.476059	0.509168	0.326249	0.375695
Avp	0.000560198	2.38931	3998.06	5810.75	3276.53	3725.12	4595.25	3172.85	610.532	626.01	659.099	1095.48	919.611	780.671
mt-Nd4	0.000569564	2.51525	19423.1	12056.5	14351.1	15947.8	8765.18	16376.8	1926.4	3046.56	2820.95	2645.31	2012.95	2751.73
Gm5617	0.000572486	1.43737	18.6494	28.534	20.8665	21.5352	25.8428	23.6035	8.311	7.01992	8.91321	11.6493	8.94434	6.498
Tspo	0.000575609	1.29452	13.8362	19.5521	15.5973	13.628	19.0632	12.3383	6.85278	5.74405	7.73334	5.5763	6.94917	5.47164
Tmc4	0.000586106	1.69889	7.19766	5.70148	6.79583	5.76558	6.31846	4.91399	1.49481	1.5937	1.7839	1.59771	1.68325	3.14891
Acr	0.0005887	2.23253	1.92965	3.13123	4.14556	4.71894	2.95875	3.16728	0.559966	0.45053	0.926703	0.910972	0.499412	0.91907
mt-Nd6	0.000598156	2.3254	6635.62	4648.13	5812.09	6220.81	3065.05	6533.81	694.665	1346.26	1224.18	1134.5	898.055	1269.61
Bola1	0.000599719	1.05513	20.4938	29.98	26.7791	25.1644	28.3696	28.3349	13.7626	14.7982	13.1227	13.7476	12.4951	8.65174
Mia	0.000601108	1.87509	20.0292	30.3243	19.328	18.0294	26.5176	17.166	6.65875	5.97368	5.60241	6.63087	6.53014	4.42364
Gm9844	0.000603359	1.37021	17.9764	20.6083	19.4087	19.2216	26.5358	19.9484	7.18362	7.33637	9.64769	8.14735	6.00914	9.52698
Riiad1	0.000605011	1.47559	15.1393	20.7487	15.5905	11.114	16.5139	12.3269	4.36533	5.96119	6.14976	5.65499	6.28079	4.46606
Timm13	0.000611001	1.34376	97.0577	134.667	113.915	108.394	150.384	111.257	51.1221	47.5454	52.5403	51.0696	40.3169	39.3755
Syne4	0.000617028	1.50421	5.93515	4.62234	5.34686	3.84636	3.93651	4.64069	1.78047	0.964266	1.368	1.54261	2.03096	2.29994
Cartpt	0.000623295	1.15506	113.283	157.82	121.051	131.963	140.928	107.594	53.9398	44.6033	52.0984	78.5734	63.0154	54.7211
mt-Atp6	0.000638544	2.43875	25102.8	16889.2	18596.4	21955.2	11002.7	18257.9	2382.67	4565.13	4120.99	3608.76	2554.43	3389.58
1700029J07Rik	0.000643152	1.2262	5.20559	5.35026	4.50964	4.28733	3.66977	4.56658	1.75143	1.72855	1.73552	1.96147	2.36998	2.24579
Mrpl14	0.00064936	1.00615	45.5538	51.7643	43.9964	38.9403	57.7482	45.572	23.6648	22.511	26.764	24.2468	22.2158	21.7821
Nupr1	0.000657829	2.10172	24.5239	32.6531	25.0453	26.6193	22.4841	15.6039	5.20635	5.16596	4.16109	7.06065	5.7171	6.92062
Fis1	0.000671615	1.07975	144.587	186.194	158.122	158.348	221.545	159.572	85.3285	84.1245	81.4277	87.0985	79.1459	69.4079
Dgcr6	0.000680389	1.07411	33.1162	45.9037	36.5034	39.7421	49.5691	40.536	21.0353	18.8451	20.306	20.8477	18.6412	16.8665
Gm35339	0.000684621	1.56792	1.60048	1.04933	1.71718	1.32026	1.6155	1.52264	0.317647	0.326118	0.375934	0.408673	0.545368	1.00301
Mrps21	0.000687287	1.00203	83.3684	105.157	86.3779	76.8691	107.196	101.59	47.39	44.2886	47.1603	51.7907	48.4935	40.7629
mt-Nd3	0.00069643	2.17269	5190.51	3586.83	3725.5	4292.41	2300.11	4270.35	619.314	1184.18	1043.67	920.986	610.12	804.154
Gnrh1	0.000706658	2.0802	17.7799	17.5146	9.58396	12.6287	15.6056	11.4493	3.09533	2.06736	2.63889	3.28693	5.17012	3.73879
Krt18	0.000708471	1.15407	2.38478	3.76228	2.84883	3.49183	3.44892	2.68873	1.25717	0.982575	1.30996	1.79961	1.74645	1.27365
Ifi27l2a	0.000711128	2.42977	19.8646	28.26	14.3481	24.6981	18.5887	15.6722	3.34443	3.59852	1.16162	3.52997	5.65355	5.24904
Rnf183	0.000718352	1.25935	0.19841	0.32792	0.35387	0.398565	0.454586	0.24734	0.084671	0.074119	0.105872	0.2715	0.212484	0.07875
Ctla2a	0.000729043	1.77628	8.2777	11.6496	7.27822	10.7097	8.66556	5.29397	1.699	2.60269	2.51389	3.3232	2.93127	2.074
Rhcg	0.000734033	1.02021	1.56923	1.90317	1.24105	1.21871	1.79071	1.61846	0.971263	0.607295	0.433735	0.639558	1.03976	0.914094
Uqcc2	0.000734243	1.06377	139.056	200.237	168.93	159.244	211.319	175	85.0703	94.1982	97.2208	84.5823	72.993	70.0447
Oas1a	0.000738192	1.13835	1.04268	1.01228	0.845295	1.17686	1.4277	1.44979	0.725631	0.464411	0.313854	0.384133	0.730111	0.541183
Myo9b	0.000749183	1.02832	17.6557	14.4791	18.1294	15.6487	18.2187	14.8634	7.57799	6.32512	6.02691	7.5773	9.77035	11.2575
Ttll3	0.000749981	1.05638	9.32977	11.7394	10.124	11.598	10.104	10.3977	5.18858	3.6823	4.92562	4.22698	6.61986	5.79009
Grcc10	0.000760176	1.03135	277.541	378.876	297.773	271.433	383.515	320.662	160.449	156.926	166.352	171.257	156.564	132.608
Dynlrb2	0.000764286	1.26265	12.735	16.3015	9.92005	13.2521	13.1312	15.1411	4.68811	6.5519	6.96472	5.35812	5.33885	4.64088
Gstm2	0.000779002	1.46983	13.7194	13.7973	8.57563	10.7454	11.8028	10.014	4.65494	2.25061	3.02304	5.13736	5.3654	4.35458
Daw1	0.000786622	1.58673	3.1988	3.30537	2.40732	1.96093	2.04231	2.20074	0.788143	0.930034	1.27212	0.730904	0.646359	0.664755
mt-Nd4l	0.000797273	2.71623	9380.28	5214.72	6530.58	7521.44	4074.41	8038.72	747.092	1066.47	1152.53	1073.08	889.962	1273.4
Nbeal2	0.000809559	1.25396	10.6237	8.36796	8.82367	8.48275	11.3567	6.94639	3.43177	2.9178	2.76949	3.9778	4.95825	4.83889
Fxyd7	0.000815037	1.14621	142.862	194.02	161.549	136.81	212.012	172.699	76.5297	78.483	88.6296	76.2153	71.2604	69.7058
Uba7	0.000826577	1.1183	1.86503	2.1712	1.90574	2.34843	1.7097	1.53047	0.865758	0.992432	0.644366	0.837226	1.01303	0.958588
Mybl2	0.00082755	1.52907	0.964212	0.683796	1.13187	0.741076	0.870064	0.873452	0.171174	0.201709	0.288124	0.248048	0.50942	0.405664
6820408C15Rik	0.000834954	1.02829	3.96231	4.89403	5.15786	4.43356	3.9812	5.00979	2.74398	1.51705	2.67862	2.41962	2.12924	1.96443
Med29	0.000847328	1.01806	16.8953	17.9189	16.1947	15.5157	24.1497	19.1519	9.54275	8.46944	9.78879	9.12869	9.9782	7.32221
Pdzd3	0.000857858	1.4807	0.964739	1.4081	1.22903	1.17963	1.54239	0.959262	0.399939	0.386133	0.318678	0.386609	0.516586	0.601717
Col18a1	0.000863834	1.16314	5.265	4.11546	6.76645	5.77761	5.79898	4.68879	2.20548	1.9467	2.19468	2.31605	2.72507	3.08542
Ifitm1	0.000870091	1.41626	16.6989	10.7973	8.20106	14.8944	15.7341	12.6338	3.89241	4.49143	3.31843	4.84114	7.47404	5.56743
Ush1c	0.000874301	1.29009	0.694464	0.593105	0.405359	0.436706	0.541108	0.59234	0.194663	0.20481	0.171632	0.228069	0.195717	0.339469
Clec3b	0.000882549	1.38464	27.5858	34.28	27.0588	29.4708	28.1499	20.6459	7.85682	9.16635	7.88855	11.2826	15.0433	12.794
Tspan11	0.000915425	1.01024	2.40907	2.99931	1.87112	1.84274	2.29581	2.23422	1.09937	1.13218	0.979665	1.04877	1.17034	1.34751
Ybx2	0.000923648	1.1987	3.18452	1.99329	2.96273	2.47769	2.14695	2.30564	1.45276	1.1065	0.934971	0.719295	0.878666	1.4737
Ctrl	0.000931928	2.2404	3.58334	3.28205	1.72906	2.88429	2.69792	2.43007	0.176163	0.706783	0.489494	0.988519	0.368402	0.785082
Sdhaf1	0.000941256	1.49111	7.82238	13.3535	9.52045	7.98906	9.43336	9.00456	3.30695	3.43198	3.19715	4.23605	3.84998	2.29884
Mustn1	0.000941593	1.26639	4.85205	3.05085	3.15344	3.58961	3.77265	3.25305	1.41985	1.62216	1.43596	1.45622	1.37547	1.69924
Eva1b	0.000954802	1.07974	3.07515	4.90112	3.58488	4.61006	3.71833	3.47767	1.68774	1.70133	2.35405	2.13062	1.66749	1.51409
Agrp	0.000973429	2.93024	35.7089	40.5046	22.3049	26.0861	26.379	20.0214	2.21046	2.60718	2.69215	4.5795	6.2736	4.07171
Plekhb1	0.000985302	1.01287	391.382	356.681	312.458	339.543	468.471	396.707	199.795	202.76	200.262	190.161	170.647	158.941
Dhx58	0.000996947	1.07403	1.09452	1.16808	1.14308	1.22304	0.816988	0.923004	0.486318	0.469	0.678516	0.370024	0.465415	0.555803
Cbr2	0.00100993	1.86172	4.6991	5.23899	4.01934	6.09078	4.56098	2.68844	0.837011	1.29748	0.702572	1.50969	1.67748	1.48667
Ces1d	0.00101403	1.50045	4.2374	4.6248	2.29967	4.77053	4.72017	3.96572	1.97036	1.12731	1.15403	1.12526	1.60243	1.72178
Usp50	0.00102465	2.67534	2.21923	2.64217	1.56683	1.36413	2.25761	1.27236	0.489112	0.188891	0.34976	0.215263	0.250701	0.278742
Selenow	0.00102603	1.10373	1003.27	1262.68	1163.69	1054.79	1468.59	1251.97	606.028	588.573	660.451	590.853	481.669	424.986
Adamtsl2	0.00102759	1.12048	2.79764	2.12108	2.60249	3.04696	3.93994	2.87684	1.04314	1.4665	1.32772	1.29137	1.6085	1.25879
Cdc42ep5	0.00103529	2.18407	3.91274	5.36153	3.33065	3.83426	5.33742	2.68272	0.480891	0.964693	1.00217	0.915554	0.900913	1.11815
Trappc6a	0.00104615	1.27404	13.7085	22.0309	15.82	18.6043	20.2816	14.5883	8.063	6.8469	7.97988	7.66141	6.51037	6.36993
Gm20219	0.00105326	1.75916	4.24932	1.96907	2.4726	2.43489	3.50657	2.94567	0.752474	0.311544	0.805263	0.766233	1.23338	1.32404
Fank1	0.00106014	1.08649	4.85548	6.52132	5.82183	6.4099	5.21556	4.16735	2.52578	2.23555	2.33941	2.86163	2.79363	2.77982
Lat	0.00109705	2.89572	2.36801	1.42317	0.98448	1.37879	1.66937	1.58953	0.062188	0.136093	0.151197	0.166171	0.411827	0.337392
Egfl8	0.00110718	1.19657	3.8799	3.11335	2.03243	2.85988	3.15601	2.94988	1.74672	1.09899	1.50156	0.980156	1.0502	1.47227
Pomc	0.00112717	1.72204	145.147	164.854	104.582	132.988	148.371	83.2257	31.7017	27.4465	27.7893	51.5795	55.1175	42.5471
Tnfrsf4	0.00113452	3.61009	1.47681	1.23149	2.56809	2.59255	1.85446	1.26569	0.151255	0.020688	0.098504	0.227344	0.138387	0.26377
Lrrc23	0.0011545	1.60433	17.2433	18.7979	11.8904	13.5335	12.6426	11.9703	4.59592	3.49913	4.45402	4.75341	5.81381	5.19369
Rpp21	0.00116178	1.01374	24.0674	29.1521	27.8763	28.9824	38.2947	25.5728	13.6318	15.2057	15.8246	16.3915	12.9392	12.1554
Col20a1	0.00117199	1.70364	0.741559	0.722352	1.36052	1.24665	0.963098	0.893415	0.321132	0.178482	0.424911	0.187964	0.351776	0.355566
Gm21953	0.00118756	1.78915	2.79093	5.6071	3.3357	3.00865	4.72203	4.57267	0.980044	1.5192	1.0212	1.37485	1.11016	0.949487
Slc23a3	0.00119518	3.78149	0.220284	0.110325	0.095244	0.128262	0.181175	0.106792	0.025068	0	0.026121	0.010048	0	0
Tha1	0.00122617	1.33964	3.41898	4.92803	4.6603	6.29611	4.88181	4.88822	1.97837	1.49368	2.38097	1.61764	1.92384	2.09302
Hhipl2	0.00123521	2.14772	1.39382	1.10048	0.895108	0.754277	1.1271	0.794959	0.149286	0.204188	0.213888	0.284221	0.224391	0.292879
Stap2	0.00123631	1.20413	2.63837	1.80644	1.93314	1.4701	2.27786	2.60207	0.803823	0.935693	0.92668	0.808886	1.0551	0.994162
Gsdmd	0.00124295	1.39142	2.64259	3.12825	1.79177	3.23122	2.83675	2.5955	1.17557	1.22649	1.21069	0.94237	0.628899	1.00119
Ttc16	0.00125944	1.20293	1.1985	1.63622	0.993209	1.14238	1.06917	0.768551	0.429373	0.608008	0.463194	0.453531	0.586296	0.416964
Cpne7	0.00126388	1.02514	55.1032	53.859	83.1014	63.3527	63.4039	52.2334	28.7648	32.7171	31.3941	27.1067	30.228	32.1118
Crym	0.00128095	1.54452	26.0726	46.2367	55.0536	51.1953	37.3965	39.9297	15.1339	17.6214	13.1444	15.5125	12.2927	14.0148
Emp3	0.00128203	1.59737	16.9602	16.1173	12.4305	15.637	14.1319	9.02943	3.50025	3.91576	3.97385	4.94174	6.06354	5.46628
Tmem52	0.00129775	1.37492	3.12373	3.23843	2.30448	3.11018	2.97287	2.82321	0.559881	1.34195	1.50015	1.9235	0.613306	0.836883
Cd79a	0.00131871	1.99723	2.07534	2.02682	1.4301	1.50444	1.75565	0.711464	0.407399	0.600834	0.221482	0.411778	0.388946	0.350079
Tesc	0.00131983	1.17011	12.8345	23.3983	22.6971	24.0998	19.4062	20.9275	8.95866	11.8763	12.7995	8.27256	7.20573	5.70833
Traf1	0.00132344	1.74387	2.67214	3.62251	2.45677	2.15878	2.11924	2.60559	1.1818	0.493435	0.502292	0.710524	0.948475	0.831598
Ccdc85b	0.00134182	1.07871	54.7732	71.7036	61.8636	63.2201	85.5408	60.2775	35.2169	31.2523	32.2668	34.3873	27.335	27.6809
Sdsl	0.00134451	1.07158	8.76967	11.5476	11.8392	8.71487	12.4418	9.75731	5.30983	4.73483	5.7304	5.66613	3.85764	4.71002
Igf2	0.00135217	1.74789	147.059	157.618	111.047	133.139	101.05	90.9405	31.5863	29.4756	27.4529	38.6057	47.4252	46.0339
Krt15	0.00135621	1.3503	0.474316	0.654754	0.922863	0.466045	0.470218	0.6652	0.121449	0.315615	0.379645	0.328579	0.111117	0.176493
Eya2	0.00135637	1.12025	6.6163	6.20223	5.4355	5.90932	4.86511	3.5515	2.72624	2.26829	1.91499	2.94649	2.65028	2.48091
Pla2g4b	0.00135752	1.54409	6.85935	5.33109	6.90567	4.56864	6.51774	4.85142	2.082	1.24262	1.20652	1.44586	2.61938	3.41717
Muc1	0.00136269	2.00932	1.17075	1.18131	1.73455	1.48594	1.32888	0.950669	0.231016	0.300929	0.25218	0.335105	0.230055	0.601099
Wdr66	0.00136684	1.01872	2.49832	3.38615	2.61249	2.24072	2.25345	2.55721	1.30601	1.18828	1.0872	1.29729	1.45837	1.3368
Amy2a3	0.00138537	2.07715	0.399969	0.31168	0.309964	0.440509	0.35843	0.26198	0.034716	0.045584	0.108521	0.077922	0.06534	0.161441
Ccm2l	0.00138821	1.16489	4.58527	2.81236	4.92919	4.26805	5.35792	3.58885	1.76913	1.45478	1.91045	1.31504	2.39921	2.54291
Cd52	0.00139471	1.44404	3.16735	4.1244	2.99001	5.01628	4.21766	5.14763	1.24954	1.02545	1.97806	1.88776	1.58295	1.34095
1520401A03Rik	0.00139489	2.4726	0.227636	0.079805	0.258361	0.198815	0.280833	0.157652	0.038857	0	0.087727	0.010383	0.027087	0.052704
Acrbp	0.00140254	1.5321	10.9799	6.78155	7.98702	6.97563	10.1357	6.48366	2.33689	2.30023	2.21172	3.10038	3.55325	3.55917
Nradd	0.00140507	1.112	4.94344	6.93616	4.56588	5.28185	6.54956	4.17231	2.52168	2.13411	1.92962	1.7056	4.20232	2.5194
C1qtnf4	0.00141973	1.16106	185.352	277.275	247.739	207.896	286.369	233.79	131.5	113.986	122.284	105.783	85.977	83.7083
Hba-a1	0.00142069	1.70121	719.965	937.333	515.942	863.646	537.412	593.372	221.416	163.941	170.736	265.515	276.997	183.07
Insl5	0.00142274	2.37504	6.82158	5.42798	8.12604	4.8879	3.71715	5.29322	0.855508	1.01412	0.742861	0.8001	1.08091	2.11353
Hba-a2	0.00143666	1.62095	680.757	875.753	510.094	810.678	524.257	530.436	222.488	161.891	179.018	256.513	277.843	180.619
Prcd	0.00143714	1.04027	2.31706	3.26378	3.28726	3.84502	4.08363	3.43007	1.68097	1.81229	1.77731	1.38715	1.91276	1.26453
Apoa2	0.00148024	1.48358	6.05317	8.84103	8.94722	8.7539	10.2216	5.96657	4.27728	2.62935	3.1048	2.65827	2.76388	2.01143
Wdr86	0.00149191	1.37581	0.657162	1.02749	0.76917	1.09769	0.738349	1.13924	0.357566	0.322208	0.416414	0.269774	0.28591	0.440154
Psmg4	0.00152298	1.2041	27.4682	43.3035	27.3403	32.6904	41.0968	30.7331	13.9037	16.8418	17.5885	16.1406	11.9611	11.515
Ccl19	0.00155381	2.068	1.22067	2.38426	1.69644	1.67533	2.36646	1.84778	0.476269	0.130285	0.186101	0.62041	0.529127	0.726736
Carmil3	0.00156036	1.00551	29.257	23.9844	35.3621	27.589	30.6302	25.3831	13.2043	11.6474	11.57	13.197	17.1475	19.0087
1700037C18Rik	0.00158306	1.37585	3.18759	5.34643	3.15621	3.81665	4.28092	3.45487	1.74377	1.56885	1.46369	1.65413	0.982579	1.54299
1700012B09Rik	0.00159549	1.02251	6.70718	7.23914	7.60249	3.99847	5.7586	4.94771	2.42638	3.48249	4.20283	3.20808	2.43825	2.08818
Cd74	0.00161143	1.12514	24.7314	29.8187	21.7549	28.7981	29.5684	17.6079	9.98123	9.65443	8.14025	14.4406	13.6849	13.912
Ccdc180	0.00161508	1.20643	1.95891	1.87325	1.30745	1.46574	1.10128	1.65685	0.665386	0.672494	0.703912	0.643328	0.716993	0.655466
Ushbp1	0.00166718	1.0847	2.79029	3.30472	2.44443	3.11092	3.23663	2.31599	1.2831	1.09287	1.22303	1.06948	1.6542	1.78836
Hmcn2	0.00168871	1.61807	1.71392	1.43144	1.45311	1.36144	1.61832	0.885272	0.392266	0.236072	0.337209	0.343276	0.828876	0.619458
2300009A05Rik	0.00171038	1.62302	6.73533	8.28632	5.62732	7.22517	9.71982	8.39635	2.35354	2.39767	3.88997	2.6023	2.46094	1.22657
Spef1l	0.00171748	1.96946	0.630582	1.22789	1.79128	1.34822	1.20026	1.47785	0.387505	0.254407	0.484532	0.269217	0.32415	0.240271
Elf3	0.00173763	1.298	0.338929	0.493569	0.152179	0.546492	0.523816	0.487515	0.173565	0.248353	0.027824	0.149838	0.279208	0.155219
Ifi35	0.0017538	1.18596	4.74361	3.38686	4.13481	3.73866	3.31065	4.82537	1.20488	1.82874	1.39723	1.82269	2.25556	2.10117
Gm8797	0.00176974	1.12733	4.88534	5.05314	7.10393	5.49743	5.22039	8.14154	1.73808	2.53577	3.51237	4.2221	1.48696	2.93915
Fam92b	0.00178994	1.78114	4.75515	7.36785	5.01836	3.80453	5.07324	4.15478	1.45672	1.21331	1.06479	1.65576	1.56866	1.81994
Adam8	0.00180241	1.67107	3.4175	1.82248	2.54423	2.47193	2.79097	2.35017	0.649099	0.674289	0.522249	0.559855	0.824771	1.60479
Clec2d	0.00180619	1.48545	15.6216	8.46464	9.49824	9.62315	9.24802	8.83065	3.82969	4.1672	4.07918	2.98471	3.75972	3.06717
Lsp1	0.00180905	1.10712	2.9907	2.68149	1.84502	1.88577	2.57115	1.81866	1.07083	0.890139	1.0466	1.06469	1.42349	0.907159
Tspan32	0.0018119	1.98405	0.252555	0.269073	0.178686	0.31282	0.267064	0.200351	0.04703	0.051461	0.134764	0.075402	0.024588	0.041007
Trib3	0.00181242	1.43328	0.696491	0.773643	0.70177	0.938532	0.973239	0.573669	0.178336	0.292706	0.238918	0.469724	0.159835	0.385044
Naprt	0.00184541	1.10851	9.6533	13.9855	9.69351	9.67741	10.2572	8.15827	5.04694	3.95453	4.81095	5.44966	5.39377	3.83145
H4c8	0.00188686	1.36493	17.4242	19.7194	16.6379	13.317	27.7229	13.8347	6.31468	6.42893	6.0649	8.40737	9.41621	5.5539
H2-Ab1	0.00190095	1.22409	11.4419	13.1689	10.4466	13.7576	9.0059	8.40122	3.52701	4.37801	4.36667	5.10747	5.41296	5.55544
Rad52	0.00190717	1.24948	5.95352	9.56178	12.1175	11.6041	8.73051	10.3815	4.19133	4.27867	4.07448	3.85947	4.08871	4.04881
Fam166b	0.00192107	1.20971	3.94028	6.73131	5.67319	4.27421	6.5833	4.69096	2.48191	2.0092	3.00664	2.07045	2.32088	1.90016
Rprml	0.0019463	1.13593	13.2477	23.1433	26.5038	27.0629	18.3618	17.2612	9.45435	10.1773	9.1591	12.4335	8.25595	7.66434
Col6a2	0.00195211	1.28042	8.17847	9.28601	8.27047	7.78035	8.30683	5.90809	2.87374	2.73556	1.70982	3.3436	4.53202	4.45463
Nudt8	0.00195291	1.00201	6.14408	9.85786	10.3889	9.35247	12.1047	11.6257	4.75703	4.01661	5.42515	5.3147	5.52243	4.65952
Zglp1	0.00196316	1.17338	0.773406	1.41694	1.31062	0.784433	1.82035	1.11964	0.306628	0.559192	0.479255	0.430153	0.774831	0.653548
Odf4	0.00198367	1.0973	1.29664	1.20788	1.26142	1.13247	1.37113	1.32007	0.575475	0.581253	0.322883	0.567775	0.393442	1.10649
Ccdc114	0.00198668	1.0126	2.35694	3.34019	2.20675	2.51148	2.5808	2.03649	1.31534	1.09736	1.22354	1.13925	1.38063	1.29483
Oas1g	0.00200992	1.98763	0.353187	0.570918	0.35544	0.229757	0.360599	0.364376	0.137209	0.095541	0.051989	0.079993	0.039128	0.159518
Prr29	0.00207259	1.06484	0.833115	1.51527	1.37924	1.27144	0.927345	1.02035	0.404183	0.425881	0.826712	0.888013	0.375668	0.400283
Xrra1	0.00207406	1.20393	0.463955	0.939355	0.747319	0.924682	0.884705	0.540446	0.257066	0.434712	0.381498	0.281006	0.309523	0.289804
Fbxl13	0.00208079	1.51399	0.624547	0.483625	0.553054	0.830796	0.372549	0.519046	0.196819	0.143574	0.28199	0.190645	0.1715	0.200216
Gngt2	0.00212523	1.59325	1.94775	1.57615	1.98436	1.88063	2.95162	2.16043	0.691141	0.99688	0.900204	0.516263	0.673405	0.365232
Thbs3	0.00212612	1.23738	7.12247	9.10763	9.24684	9.60015	6.75713	7.45162	2.7679	2.60408	2.78529	3.31787	4.69744	4.73164
Tbc1d10c	0.00214245	2.49228	0.995256	0.802059	0.748169	1.69898	1.36338	1.72946	0.193057	0.160546	0.249443	0.179521	0.234165	0.28729
Lst1	0.00214427	1.30216	5.22177	7.55373	5.61153	5.53639	6.48486	5.44983	3.60688	1.83725	1.68477	3.14063	1.88573	2.38585
Anxa9	0.00223311	1.09002	1.215	1.22628	1.97856	1.61943	2.05289	2.14025	0.770989	0.666019	0.563764	0.422874	1.32947	1.05359
Msln	0.00224162	1.54083	1.29304	1.52811	1.09936	1.75378	2.02227	0.772099	0.556443	0.462738	0.359482	0.570958	0.546924	0.414024
Fcor	0.00227764	1.21398	5.65671	9.79335	5.87825	9.97083	10.8078	5.84973	3.02847	4.68252	3.01844	4.32766	3.16666	2.44929
Tcea3	0.00229409	1.08745	2.35782	3.22891	1.90856	3.35775	2.81683	2.44567	0.866406	0.867347	1.09487	1.50729	1.61913	1.62878
Ccl5	0.0023021	2.076	2.65243	2.39115	1.4745	3.17705	0.851461	3.24751	0.291066	0.743137	0	0.466653	0.304347	1.46635
Vsig2	0.00233696	1.44513	1.38292	1.27569	1.37664	1.33142	2.29558	1.20277	0.428209	0.594699	0.274579	0.633719	0.654402	0.670155
AB124611	0.00234236	1.0445	0.626904	0.753535	0.440465	0.456276	0.810236	0.477588	0.285367	0.292735	0.148675	0.386029	0.428933	0.186617
Osgin1	0.00234263	1.34746	1.11168	1.21476	1.29996	1.64763	1.0568	1.38583	0.230016	0.327192	0.143805	0.774428	0.901921	0.655163
Misp	0.00234512	1.71885	1.40653	0.671285	0.67969	0.606998	0.797136	0.939731	0.348373	0.309076	0.304136	0.037739	0.265818	0.284604
1110017D15Rik	0.00238092	1.13949	4.89421	8.4885	6.03782	6.95078	6.41297	6.76435	3.0875	2.66295	3.70918	3.04283	3.57021	1.8792
Atoh8	0.00238884	1.18068	2.93492	3.76032	2.71829	2.78103	2.95473	2.51849	1.50297	0.889867	0.933213	1.00677	1.68996	1.77127
Jsrp1	0.00241036	1.87373	2.11717	2.50506	2.24355	3.78407	1.99893	3.79398	0.871232	1.14397	0.645559	0.838086	0.425128	0.562712
Wdr27	0.00241961	1.27112	0.875762	0.649938	0.572284	0.936399	0.757698	0.733338	0.231034	0.327152	0.391785	0.275989	0.412101	0.236997
Wdr93	0.00244975	1.26564	1.05865	1.40173	1.27663	1.29446	1.22442	0.714852	0.598606	0.494341	0.847349	0.307835	0.283436	0.367661
Lrrc71	0.00248425	1.17027	1.45445	2.20478	2.05481	2.32052	1.26371	1.92862	0.730589	0.934385	1.02821	0.912719	0.952429	0.430202
Rax	0.00248442	2.01233	4.69055	6.45339	3.36929	6.05926	5.04654	2.61769	0.544646	0.733486	1.22234	1.7688	1.57707	1.15274
Gdpd3	0.00249796	2.43529	0.438991	0.593622	0.640598	0.299059	0.928422	0.629339	0.067442	0.098394	0.187398	0.072085	0.07052	0.156814
Hes5	0.00249961	1.05882	18.885	24.0838	24.0654	22.8028	31.0294	26.4133	14.4579	11.6601	11.7108	12.6799	10.1558	10.0335
Ppbp	0.00254324	2.69433	3.0247	2.517	1.17701	2.4873	1.77146	1.16019	0.14298	0.3129	0.148984	0.993344	0	0.277043
Lmntd1	0.00254988	1.03294	0.305668	0.39868	0.297364	0.42601	0.371369	0.267545	0.093253	0.163991	0.21169	0.160188	0.195017	0.185854
Rpl9-ps6	0.00256915	1.33423	43.9731	70.2158	48.5808	40.3536	68.8534	36.7356	19.9523	23.6513	18.9069	20.2537	19.8801	19.7924
Nuf2	0.0025839	1.00457	3.71954	3.23809	2.74048	2.28358	2.9692	2.27296	1.47527	1.11363	1.36209	1.52692	1.63045	1.47631
Sbsn	0.00259807	1.04751	2.55728	3.67668	2.78807	4.75967	4.18452	4.01241	1.44506	1.47002	1.99981	1.6471	2.08943	1.98188
Adgrf4	0.00260543	1.42999	0.461141	0.460258	0.704965	0.880308	0.470218	0.646722	0.219282	0.138427	0.22849	0.202826	0.202832	0.352986
Acta1	0.00261069	1.05564	3.87158	6.75858	4.88356	6.3616	5.44711	4.5605	2.62111	1.98557	3.09883	3.28642	2.70558	1.64083
Hbb-bt	0.00267241	1.45016	389.943	520.334	285.201	440.73	282.869	326.544	141.521	104.923	113.151	165.036	175.118	122.107
Crlf1	0.00269649	1.28405	2.82022	3.20566	3.04183	2.69875	4.3275	2.23554	1.35004	0.790148	1.37402	1.30875	1.28033	1.42354
H2-Eb1	0.00269759	1.03647	8.1094	9.16985	6.75624	8.80798	9.07972	6.7162	2.45721	2.65725	2.74006	5.44853	4.91328	5.49624
Hbb-bs	0.00270077	1.61927	762.021	1093.2	564.877	917.878	567.856	644.722	257.934	193.555	216.302	290.971	303.199	219.242
Tekt1	0.0027518	1.12307	11.3562	13.4727	8.35758	9.50863	10.7273	7.24302	3.80276	4.57886	4.74167	4.82132	5.02442	4.88348
Zfp593	0.00277962	1.18741	3.66219	3.84348	2.07381	3.55179	3.35239	2.92999	0.671787	2.20523	1.51666	1.34631	1.87318	0.911178
Prrx2	0.00279075	1.26221	4.05335	3.36386	1.70826	3.66539	3.72916	2.28022	1.169	1.22993	0.702741	1.26148	1.95888	1.51587
Unc45b	0.00279146	1.39338	0.678196	0.678088	0.425853	0.73018	0.678041	0.645615	0.271528	0.1451	0.348728	0.151859	0.330138	0.212897
Hcst	0.00283484	2.04347	1.02616	0.822296	1.55289	1.13524	0.904266	1.5635	0.116778	0.383338	0.486725	0.468061	0.244212	0
Psrc1	0.00285459	1.47444	0.383727	0.451628	0.715497	0.4692	0.495944	0.29233	0.120087	0.071673	0.25026	0.157525	0.182643	0.228455
Ttll9	0.00291408	1.25492	3.38023	4.01684	2.24209	2.21419	3.39841	2.42615	1.31137	0.918348	1.1888	1.09328	1.78258	1.11295
Prdm6	0.00293883	1.1883	1.54318	1.43689	1.26867	1.9059	1.23346	1.13799	0.556523	0.462805	0.293812	0.773283	0.706061	0.948941
Ggt1	0.00301838	1.02312	1.60921	1.96681	1.33218	1.07842	1.34169	2.01571	1.06179	0.797669	0.61924	0.743178	0.629689	0.74618
Arhgef39	0.00304095	1.28338	0.376793	0.288726	0.164951	0.256688	0.149415	0.281829	0.144717	0.116124	0.110582	0.069605	0.070616	0.112164
Nnmt	0.00311418	1.48115	1.91633	1.43964	1.37367	1.56799	1.19097	1.82313	0.344334	0.753548	0.592009	0.607262	0.738095	0.300238
Togaram2	0.00314299	1.02896	6.22297	8.19032	6.42797	5.31319	5.6017	5.61852	3.09198	2.55342	2.37077	3.07489	3.92696	3.29796
Cited1	0.00315378	1.04706	25.2124	32.6493	21.5926	23.7292	29.5625	21.0251	10.5203	8.38804	11.3607	14.7083	15.739	13.7019
Vsig8	0.00330296	1.35195	0.643697	1.4749	1.34374	0.983846	1.94277	1.57145	0.439516	0.360692	0.357791	0.506472	0.847335	0.606783
Pla2g4f	0.00331231	3.21144	0.113213	0.277024	0.110138	0.339015	0.27364	0.161295	0	0.072501	0	0.026558	0	0.038516
Cenpa	0.0033622	1.26969	0.774242	1.29443	0.739515	0.560643	0.446576	1.08802	0.158596	0.583715	0.300464	0.3005	0.271362	0.419048
Nrgn	0.00338396	1.16164	166.189	235.57	345.973	232.667	247.037	195.067	101.171	98.4194	106.437	112.241	104.19	113.407
Cnbd2	0.00343492	1.00707	2.01632	2.83816	1.82389	2.7435	1.80797	2.76345	1.19559	1.1893	1.18288	0.977781	1.23752	1.17937
Cox4i2	0.00344665	1.16846	4.47681	2.88273	2.76866	4.28983	3.88865	3.4681	1.6703	1.75599	1.67219	0.866388	1.78077	1.94187
Nanos2	0.00345996	1.15112	1.20141	0.855054	1.16878	1.06035	1.00297	1.30063	0.5181	0.56691	0.742301	0.545112	0.406306	0.18823
BC051142	0.00347502	1.53731	1.60103	1.88616	2.82304	2.3835	1.48139	2.50617	0.90374	0.713626	0.553364	0.709527	0.828074	0.660734
Lypd2	0.00349398	2.59071	6.82754	10.6716	5.16075	5.30244	6.96009	2.93916	0.704307	0.990849	0.733882	1.33083	1.99892	0.526383
Mmp23	0.00352035	1.54311	3.30351	3.42165	2.95735	2.65197	2.54565	1.90576	0.68389	0.728627	0.450068	1.50041	1.20437	1.19262
Fam167b	0.00352041	1.12997	0.840811	1.08961	0.408985	0.715996	1.05583	0.917146	0.376757	0.294465	0.280412	0.345165	0.562784	0.438012
Rpl10-ps3	0.00355472	1.16175	20.9984	18.2201	16.4381	18.4658	16.6883	8.46658	9.14028	4.48592	7.17808	7.56955	8.88975	7.11028
Misp3	0.00360994	1.23543	2.2394	2.12413	1.81862	1.95926	2.7387	2.62173	0.797769	1.39668	1.12221	1.07119	0.813318	0.533298
Birc5	0.00363867	1.406	0.977703	1.20858	1.23937	0.884966	1.80144	0.997214	0.371718	0.348632	0.52961	0.413523	0.428341	0.590904
Apoa1	0.00365737	2.23471	1.16205	2.33408	1.13048	1.0256	0.840763	1.70277	0.125281	0.548334	0.217569	0.26781	0.436658	0.14565
Tnnc1	0.00370089	1.20993	4.43849	5.29303	4.82791	7.91178	8.61089	6.79655	2.54141	3.01584	2.57353	3.73021	2.43281	2.08071
Masp2	0.00374683	3.46833	0.659822	0.353681	0.72864	1.27093	0.735444	1.06708	0.127852	0	0.133221	0	0.152784	0.021234
Mapk13	0.00378353	1.70848	0.207984	0.367782	0.474707	0.30182	0.143802	0.358997	0.08193	0.143437	0.068296	0.08538	0.017134	0.17145
Cga	0.00378717	2.25781	12.0749	18.0607	12.2757	15.3817	8.53977	7.88936	2.50523	1.8275	0.953013	2.67768	4.78171	2.77385
Tle6	0.00382512	1.09131	2.03961	3.25788	2.45617	2.98855	1.81128	2.09826	0.902514	0.976444	1.24684	1.22748	1.15576	1.36756
Amhr2	0.00386931	1.53584	1.03856	2.45768	1.84388	1.61911	1.13941	1.39178	0.585031	0.683793	0.471052	0.405026	0.417086	0.711064
Crabp2	0.00397892	1.45302	20.2451	21.1544	16.0088	15.8002	21.8661	10.8306	5.46095	3.33653	5.60361	7.39979	8.40579	8.47583
Prss53	0.00411795	1.42052	3.08288	3.31896	3.84186	1.53542	3.8123	3.09676	1.09598	0.956535	1.00605	1.23419	1.0505	1.63823
Ptges3l	0.00419729	1.18316	1.14537	0.93302	1.34247	0.867773	1.43006	0.842935	0.424006	0.664998	0.456538	0.521173	0.428576	0.394354
Cldn3	0.00427831	1.49033	0.620133	1.11809	0.864711	0.736599	1.24594	0.66999	0.338741	0.185327	0.176483	0.407317	0.442748	0.319975
3110082J24Rik	0.00432928	1.55834	4.61644	4.76861	6.03482	3.67915	6.86483	6.65412	1.82231	2.47901	2.10411	2.36889	1.44197	0.858887
Cenps	0.00440404	1.22679	3.39089	6.16808	4.77956	3.75921	4.19128	4.20834	1.96028	1.53694	1.62443	2.5118	2.16271	1.52531
Mcm10	0.00448157	1.57942	0.569678	0.596099	0.554202	0.77831	0.785279	0.380447	0.130237	0.20521	0.141134	0.21298	0.185205	0.351276
Cox7a1	0.00451389	1.10382	5.8403	9.85065	5.77328	6.8121	9.41316	6.16502	4.14855	3.80042	2.46296	4.36968	2.87509	2.74801
Col6a1	0.00455622	1.31494	12.2794	12.793	17.871	15.9808	10.9572	11.4157	4.98532	4.31853	3.59429	5.12666	6.72662	7.92539
Cfap126	0.00458588	1.06337	6.26401	9.55247	4.78111	6.83305	8.24605	7.0651	3.18597	3.08817	3.82	3.75515	4.47223	2.13105
Rtbdn	0.00465517	1.09172	1.71552	1.68043	1.67614	2.31168	2.47374	1.44424	0.753014	0.682468	0.919369	0.731682	0.978253	1.238
Smim5	0.00474581	1.19103	1.78785	3.25104	1.79875	2.77065	2.32685	2.05732	1.01729	0.907628	1.0437	0.928402	1.52192	0.709611
Hsf2bp	0.00474591	1.30702	0.399177	0.391986	0.263512	0.358598	0.542713	0.390987	0.262824	0.135804	0.167359	0.122901	0.106873	0.152777
Myl4	0.00475847	1.21	1.93607	2.40151	2.12422	2.5326	3.06326	1.57878	0.984008	1.25616	0.932116	0.812712	0.748297	1.16133
Mfap4	0.00478456	1.46735	2.58442	1.73499	1.72518	3.3858	2.70382	1.88508	0.563182	0.893548	0.806893	0.767487	0.94221	1.0967
1700029I15Rik	0.00480426	1.79796	3.87029	4.12005	1.40192	3.75425	3.17833	4.26016	0.590375	0.876707	1.40609	1.11555	0.705503	1.22565
Crybb3	0.00480873	1.60897	2.27148	1.423	1.19852	1.69471	1.66917	0.695917	0.709765	0.323597	0.554677	0.489944	0.329845	0.527187
Bub1b	0.00480928	1.0998	1.63499	1.15809	1.60394	1.32478	1.35117	1.59288	0.365869	0.777579	0.395895	0.54146	0.95641	1.00612
Ttll6	0.0048302	1.7546	2.35191	3.12734	2.07828	2.01304	1.54748	1.77544	0.488455	0.307505	0.634465	0.767028	0.993502	0.630103
Myl7	0.00491466	3.27766	2.05001	1.73257	0.706323	2.50664	3.83879	2.18288	0.131226	0.287178	0.319052	0	0.503119	0.101708
Glod5	0.00495983	1.79298	1.94695	1.31638	1.89406	3.61018	2.33595	1.91367	0.30678	0.419602	1.11882	0.645549	0.641557	0.62415
Rbpjl	0.00502612	1.23496	0.533188	0.293741	0.374619	0.496725	0.396762	0.566208	0.18203	0.243441	0.242361	0.178347	0.084594	0.199869
Nr2c2ap	0.00515153	1.54261	9.2835	13.8687	10.4935	8.98841	17.1094	17.8554	3.98437	2.17987	5.75573	5.3717	4.92367	4.42161
Spdef	0.00517397	1.37018	1.65104	2.29168	1.03255	1.66174	1.09465	1.17612	0.563666	0.807674	0.797097	0.408817	0.603419	0.265244
Gast	0.00527876	1.8872	2.30069	2.8148	3.8369	2.12422	2.02739	1.98034	1.12208	0.552506	0.292299	0.539695	1.11462	0.45658
Mylpf	0.00535271	1.13594	1.68506	1.30874	1.13489	1.68454	2.056	0.710977	0.557577	0.726317	0.553324	0.85137	0.721834	0.49389
Smagp	0.00541831	1.22841	2.46129	1.84645	1.40651	1.08235	2.56629	1.54486	0.652247	0.848719	0.661268	0.83375	1.10596	0.553349
Spata19	0.00542809	3.64487	0.601673	0.260355	0.585328	1.00895	1.17068	0.480034	0	0	0.205475	0.01976	0.103096	0
Dnajb13	0.00551069	1.02867	1.40162	2.77047	1.95947	1.29489	1.85543	1.55314	0.723087	1.09373	1.07478	1.03143	0.633775	0.754113
Spem1	0.00561188	2.3965	0.290468	0.436425	0.188385	0.456644	0.20477	0.301751	0.049583	0.054254	0	0.039747	0.155536	0.057644
Dok2	0.00572947	1.27018	0.786562	0.675316	0.464582	0.991205	0.980277	1.28404	0.412388	0.199385	0.329774	0.307518	0.531487	0.36794
Sh2d6	0.00584121	1.30133	1.66993	1.34414	0.884808	2.15649	1.43477	1.04088	0.641378	0.300773	0.572838	0.624321	0.718548	0.603627
Erich2	0.00586387	1.3546	1.93471	1.64567	0.971435	1.16102	1.69939	1.38097	0.511363	0.681937	0.699347	0.589264	0.250639	0.705972
Pdzk1ip1	0.00591063	1.85302	1.57311	3.11737	1.68203	1.3368	1.12398	1.59005	0.246757	0.571772	0.514237	0.535243	0.409791	0.607501
Pdia2	0.00596459	2.60562	0.219623	0.224388	0.327607	0.445013	0.139344	0.365046	0.104971	0.098452	0.031251	0.048084	0	0
1700003F12Rik	0.00604544	1.88211	6.74887	15.1338	7.72028	8.70829	13.807	5.8343	1.56306	1.78633	2.24398	3.50838	3.99516	2.62483
C1s2	0.0060959	1.47662	0.170385	0.358403	0.13813	0.267862	0.30029	0.271405	0.058169	0.053041	0.060612	0.077717	0.212883	0.078898
Cpt1b	0.00637371	1.01138	1.86178	2.2084	1.28324	1.65107	1.84918	1.08059	0.679357	0.734912	0.579178	0.84783	1.1624	0.924437
Isg20	0.00640253	1.19717	1.19991	1.90381	0.918285	1.40849	1.38727	1.95454	0.507964	0.591679	0.887848	0.472875	0.56541	0.800101
Zmynd15	0.00642533	1.40379	0.39327	0.311296	0.354593	0.341802	0.578152	0.167404	0.127713	0.075247	0.020473	0.086628	0.318443	0.182741
Tmem37	0.00645453	1.24066	1.53764	2.59908	2.41209	1.75256	3.19098	1.62932	0.944909	0.646206	0.799977	1.23088	1.1527	0.778131
Tmem88	0.00653048	1.01761	1.31221	2.95739	1.58708	2.11869	1.66887	1.30424	0.490367	1.093	1.04084	1.01913	1.02549	0.73901
Fgf8	0.00678078	2.86742	0.261313	0.10096	0.054475	0.273874	0.355276	0.465366	0.038234	0	0	0	0.079957	0.0889
Npas4	0.00681699	1.00831	5.85775	7.25003	5.81368	5.11123	5.73817	4.58782	2.21597	2.15965	1.95264	3.15294	3.74757	3.85195
Cpn1	0.00682712	1.02439	0.578949	0.907146	0.697322	0.809036	1.07866	0.549886	0.36707	0.24717	0.353062	0.328206	0.51668	0.459577
Nmb	0.0068627	1.44434	3.85874	14.0822	8.95513	9.11167	10.7173	7.59226	2.66649	3.07401	2.48077	3.62618	5.17802	2.93395
Dnase1l2	0.00694469	2.02731	15.287	6.14867	6.86564	7.12354	12.509	7.36593	1.58873	1.57917	1.69336	1.47774	3.20833	4.01837
Cxcl10	0.00710157	1.50763	0.908366	1.01542	0.777647	0.418892	1.24872	0.747371	0.372139	0.407198	0.271436	0.268486	0.155648	0.324482
Dqx1	0.00717921	1.14977	0.471681	0.558099	0.34415	0.270349	0.436432	0.48694	0.105677	0.140411	0.188768	0.096816	0.213106	0.412454
Cort	0.00719607	2.6138	2.71707	4.73109	8.58155	4.99318	5.94314	2.55195	0.457451	0.500547	0.595825	0.672293	1.35525	1.24093
Psmb9	0.00719642	1.25599	1.6904	4.50046	1.9826	3.09626	2.0214	2.06789	1.03555	1.4518	0.826135	1.42678	0.693671	0.996992
Cryga	0.00725608	1.8493	0.564437	1.38113	0.431438	1.64794	1.62006	0.653374	0.206463	0.225914	0.129079	0.562722	0.431768	0.192024
Foxc2	0.00739468	1.0351	4.74371	5.60187	3.57133	5.85364	5.41715	2.97408	1.83733	1.72026	1.4704	2.80146	2.85204	3.06094
1700001J03Rik	0.00742114	3.90199	0.640357	1.32774	1.5574	1.4765	0.372431	0.798278	0.131171	0	0.068339	0	0.137156	0.076249
Des	0.00750621	1.11124	1.57937	1.56132	1.2571	2.38887	2.07814	1.24172	0.89151	0.573232	0.344763	0.74413	0.970632	1.15399
Gm4779	0.00760074	1.7404	0.159886	0.393974	0.197021	0.245771	0.293058	0.584661	0.065502	0.179183	0.034126	0.052508	0.102737	0.12692
Wfdc2	0.0078065	2.47032	2.85136	4.86201	1.20417	3.01158	2.59445	2.4248	0.452769	0.39634	0.825618	0.362953	0.757487	0.263191
Retn	0.00795114	2.07025	1.08516	0.920722	0.574415	0.618836	0.354376	0.537131	0.179789	0.089421	0.170307	0.078613	0.170902	0.285027
Mfap5	0.00797798	1.44651	2.04606	1.91546	1.05649	2.45782	1.28152	1.51077	0.209558	0.687901	0.302341	0.801171	1.12931	0.637183
Sftpc	0.00803002	1.2985	0.44542	1.23331	1.1452	0.6669	0.336436	0.872562	0.097757	0.427867	0.611172	0.417945	0.204435	0.151534
Ikbke	0.00803095	1.2531	1.53392	1.21501	1.10833	1.08478	0.669292	1.35526	0.396574	0.350487	0.484747	0.250656	0.677827	0.762508
BC028528	0.00804916	2.06993	2.68445	2.12962	1.04461	2.32581	3.59566	1.51707	0.146635	0.240675	0.687568	0.558349	0.766633	0.767143
Gm11808	0.00810269	2.40613	37.9971	89.8271	46.9357	46.1114	109.702	48.9881	11.2141	12.8869	13.0723	13.0944	10.3873	10.9538
Ripor3	0.00815114	1.22689	0.418525	0.49439	0.393115	0.824343	0.541766	0.575711	0.288232	0.194084	0.231027	0.236979	0.085006	0.352278
S100a9	0.00816896	1.44628	3.37905	2.34992	1.54971	2.17547	1.93973	2.10618	0.395522	0.703275	0.618197	1.03045	0.827141	1.37949
Tmem273	0.00826243	1.29287	0.84614	0.152558	0.707913	0.620768	1.00212	0.738367	0.346647	0.151722	0.397323	0.194517	0.308095	0.261954
Ppic	0.00828491	1.01509	3.96919	2.91438	3.4595	4.1788	2.14609	2.52999	1.08529	1.56996	1.82088	1.65152	1.59643	1.77499
Shisal2a	0.0082913	1.2112	4.37673	7.01015	5.33263	7.2592	5.30218	4.29071	2.39364	1.47625	1.63254	2.37235	4.55067	2.07446
Hgfac	0.00837166	4.15675	0.152858	0.328602	0.320289	0.123235	0.099471	0.117265	0	0.026355	0	0.009654	0	0.028002
Areg	0.0085191	2.11234	0.290348	0.430014	0.161406	0.21736	0.307029	0.20683	0.084964	0	0.066399	0.034055	0.088841	0.098778
Casp4	0.00859312	1.45139	0.212173	0.200381	0.373502	0.264728	0.256414	0.340068	0.113828	0.090583	0.021565	0.082952	0.173123	0.120304
Erich6	0.00869672	1.2759	1.44645	0.620937	0.759417	1.31144	0.691939	0.88727	0.399757	0.308766	0.57581	0.461834	0.245881	0.369067
Hpx	0.00883273	2.08328	0.252149	0.303081	0.654131	0.528537	0.497718	0.251466	0.137734	0.113032	0.107638	0.110411	0.018002	0.100079
Nme9	0.0088622	1.33501	4.15052	5.84992	3.40238	3.51093	2.31702	3.04667	1.1005	1.48752	2.00113	1.29734	1.7148	1.22925
Meig1	0.00889845	1.25099	4.73321	8.20412	4.42668	3.66662	4.42483	5.50142	1.40515	2.17816	2.48906	2.02753	3.10994	1.79696
Rnf223	0.00890184	1.02964	0.762527	1.13267	1.18016	0.899076	1.0629	0.604912	0.621234	0.320459	0.517857	0.384171	0.445427	0.474613
Tshb	0.00891468	1.89018	1.43656	1.50506	0.830968	1.70907	1.35487	0.580812	0	0.174047	0.414354	0.414404	0.582121	0.416077
Cldn7	0.00901715	2.42806	0.853733	0.326512	0.226511	0.854097	0.779674	0.403134	0.15898	0.028993	0.041414	0.042481	0.152382	0.215633
Slc5a10	0.00908241	2.50098	0.076823	0.115427	0.074736	0.161032	0.162474	0.031923	0.026227	0.014349	0.027329	0.042049	0	0
Tslp	0.00926226	2.96554	0.268541	0.363132	0.283016	0.187632	0.23664	0	0	0.050158	0.047765	0.073493	0	0
Tcap	0.00932027	1.90944	1.22269	0.910554	0.491305	0.445726	0.927541	1.65676	0.163341	0.119153	0.283666	0.261877	0.170794	0.506393
Actg2	0.00932608	1.5049	0.517879	0.350149	0.157441	0.373156	0.496291	0.221923	0.082877	0.163232	0.069086	0.053149	0.242644	0.134892
Col6a4	0.00935572	1.16058	0.3518	0.777698	0.720199	0.618791	0.572574	0.537711	0.29765	0.24684	0.277502	0.175814	0.176911	0.42618
Gm1141	0.00943857	1.39541	0.403977	0.113807	0.483066	0.317546	0.329289	0.577045	0.068959	0.132047	0.125745	0.138198	0.090132	0.290618
Catsperg1	0.00944504	1.41137	1.13039	1.16193	0.94954	1.14538	0.670443	0.764377	0.213606	0.23373	0.32496	0.304794	0.451173	0.66057
Prlh	0.00952844	2.69075	0.821676	3.12756	2.48688	2.20077	3.95824	1.36575	0.28052	0.613896	0.097433	0.224873	0.29332	0.652257
Myo1a	0.00953042	1.57095	1.25294	0.51522	1.13337	0.837048	1.10798	0.548047	0.255152	0.254555	0.242407	0.264695	0.345263	0.453678
Krt19	0.00995124	1.42594	1.30405	1.26132	0.541809	0.911154	1.39333	1.1007	0.194776	0.182679	0.536381	0.345734	0.581897	0.582284
Sag	0.00995859	1.21425	0.463163	0.337585	0.623144	0.557723	0.75029	0.761658	0.111023	0.14357	0.536359	0.28318	0.337714	0.093872
Sgcg	0.0101916	2.59811	0.216758	0.659495	0.237228	0.397558	0.401118	0.227992	0.020813	0.037956	0.043373	0.072298	0.058033	0.120983
Ccdc68	0.0102558	2.24753	0.091215	0.061672	0.232934	0.238998	0.120569	0.127923	0.035033	0.038334	0.048672	0.037445	0.024421	0
Bpifb5	0.0103086	1.9925	0.061571	0.083259	0.119797	0.193592	0.081386	0	0	0.034501	0	0.101103	0	0
Tm6sf2	0.0103833	1.60343	5.64604	3.31471	2.69547	3.2144	3.42746	2.47648	1.23149	0.48823	0.483527	0.600905	1.60495	2.42769
Apol9b	0.0104756	2.02646	0.124537	0.299386	0.269232	0.609109	0.17559	0.345	0.028345	0.06203	0	0.136331	0.088914	0.131812
Crygn	0.0105187	1.7699	2.51352	6.51455	2.5675	4.11615	5.54842	3.68173	1.64115	1.12675	1.40829	1.52196	0.942136	0.673402
Ovgp1	0.010596	1.21398	3.04305	2.87156	3.04497	5.49226	3.25131	2.97569	0.939055	1.24012	1.39182	1.26544	1.74373	2.33405
Slc47a1	0.0106083	1.03217	5.55653	8.05768	5.68094	7.43175	4.97786	4.2991	2.44118	2.78803	1.84417	2.88034	3.9884	3.66289
Kcnmb4	0.010698	1.33511	0.487133	0.518993	0.560063	0.638185	0.749264	0.317435	0.306156	0.136481	0.319012	0.190885	0.106709	0.237288
Rufy4	0.0107689	1.0013	0.29212	0.341373	0.568369	0.498929	0.709332	0.633909	0.188378	0.07275	0.265567	0.453028	0.231734	0.309185
Adh1	0.0107978	1.72062	0.82118	1.41203	0.576963	0.669395	1.7528	0.720377	0.404951	0.306763	0.146062	0.249708	0.390858	0.307824
Casp12	0.0108603	1.10281	0.852566	0.47823	0.608231	1.07225	0.791358	0.684928	0.145533	0.392801	0.171863	0.443321	0.405797	0.530142
1810020O05Rik	0.0108818	1.28823	0.670073	1.69288	0.973782	1.47392	0.857282	1.0622	0.669343	0.5099	0.476738	0.543357	0.310076	0.246256
Fut7	0.0110229	1.27838	0.59919	0.202563	0.270638	0.213068	0.407323	0.293448	0.17534	0.047965	0.057095	0.105418	0.229176	0.203847
2200002D01Rik	0.0113023	1.6561	0.615699	0.986756	0.554605	1.57738	0.940437	0.653829	0.186844	0.255558	0.365044	0.280837	0.439582	0.162917
Aoc3	0.0114235	1.10944	0.5562	0.471917	0.323594	0.662946	0.668882	0.278706	0.217811	0.213887	0.151305	0.264144	0.23359	0.292182
Hrg	0.011597	5.01825	0.113732	0	0.110643	0.066222	0.053452	0.09452	0	0	0	0	0.013533	0
Npc1l1	0.0116315	1.24497	0.231278	0.320373	0.400602	0.206923	0.274391	0.182834	0.173323	0.03793	0.132441	0.050945	0.193314	0.094035
Stac3	0.0117241	1.26067	0.523525	1.08053	1.34027	1.37172	0.582738	0.996123	0.239876	0.385992	0.338166	0.407205	0.38361	0.705393
Foxs1	0.011769	1.51789	0.922584	1.87134	0.916219	0.966929	0.894288	1.07822	0.728368	0.344643	0.36922	0.078903	0.205839	0.595041
Slc26a4	0.0118781	1.03511	0.591656	0.518762	0.93828	0.518161	0.608506	0.656737	0.116214	0.426903	0.302735	0.219593	0.486068	0.318471
Gm13306	0.0119157	1.08468	2.21928	4.16806	3.46338	2.59247	2.81124	4.61097	1.98886	1.7358	1.35691	1.63229	1.38641	1.26622
Gm21586	0.0119624	1.66612	1.46655	3.36532	3.69649	2.09597	3.2426	4.40436	1.16067	0.597655	0.924842	1.36827	1.07085	0.635001
Prss30	0.0119971	1.75722	0.641588	1.6331	1.00355	0.685612	0.851386	0.878225	0.399422	0.169181	0.241661	0.237559	0.336813	0.299589
Aanat	0.01201	1.41101	1.12126	1.43426	1.82783	1.68333	2.78795	1.19	0.636273	0.441503	0.533627	0.510054	0.681533	0.974267
Tbx15	0.012027	1.21487	0.860782	1.42467	0.641134	0.768243	0.711121	0.821564	0.365043	0.316532	0.272719	0.314714	0.374498	0.608564
Lrg1	0.0121248	1.37736	3.20345	2.17802	1.94994	1.83814	2.02492	1.07087	0.678189	0.48135	1.24144	0.837523	0.651638	0.831071
Cyp2d26	0.0121394	1.91787	0.296448	0.213797	0.245135	0.233023	0.047022	0.147822	0.075905	0.033223	0.031637	0.036509	0.047621	0.088246
Tnfrsf25	0.0124542	2.17016	4.19414	2.31449	1.79787	1.46138	3.07766	1.39334	0.396695	0.359656	0.307062	0.499717	0.651823	0.948737
P2rx2	0.0125664	1.75964	0.732777	1.28923	0.344937	0.966192	0.974843	0.412543	0.14526	0.185436	0.163973	0.252296	0.379721	0.267388
Cd3d	0.0127081	4.79461	0.117886	0.185978	0.114683	0.169884	0.249317	0	0.030185	0	0	0	0	0
Gm5795	0.0127179	2.59169	0.290907	0.074929	0.080858	0.087111	0.20508	0.310841	0.085128	0	0	0	0.089012	0
Smim22	0.01299	2.22946	1.5108	2.5294	1.20731	1.07447	1.48349	0.672639	0.663156	0.120939	0.345502	0.177202	0.115569	0.385488
F12	0.0130361	1.58334	0.411397	0.927181	0.750415	0.52549	0.965227	0.4808	0.447687	0.230524	0.150922	0.137218	0.22029	0.168389
Clec10a	0.0134348	1.12177	0.398352	0.584601	0.6579	0.514592	0.225313	0.461945	0.037953	0.311462	0.177959	0.34227	0.238107	0.198555
Nrtn	0.0139492	1.05996	10.296	8.54901	9.7527	14.1469	15.5498	10.8392	8.75398	6.01774	5.4414	5.39959	3.58751	3.95945
Acp5	0.0139919	1.63791	0.239601	0.311999	0.220143	0.627795	0.337822	0.265502	0.0409	0.119342	0.213087	0.153004	0.085532	0.0317
Cdrt4	0.0140117	3.66554	0.209113	0.188514	0.067811	0	0.221126	0.260682	0	0	0	0	0.074649	0
Nanos3	0.0140277	1.87404	0.518142	0.688362	1.22037	1.6863	1.26884	0.577931	0.335167	0.275057	0.378344	0.13434	0.438076	0.064943
Mfsd2b	0.0142311	1.00694	0.843001	0.60106	0.98412	0.771073	0.567275	0.82161	0.266869	0.352131	0.269897	0.346063	0.582716	0.465387
Gm5737	0.0142408	2.18736	0.297147	0.089292	0.077087	0.083048	0.418958	0.197561	0	0.022201	0	0.016264	0.16972	0.047176
Asgr1	0.0143639	2.19289	8.99591	14.1493	6.30172	7.05464	4.1367	4.36336	1.36258	1.3667	1.99447	1.62542	1.81486	1.6784
Aqp7	0.0144518	1.47208	0.080192	0.09639	0.034673	0.074708	0.084799	0.022215	0.045629	0	0.009509	0.029262	0.057253	0
Defb25	0.0145165	2.55003	0.344001	0.465173	0.41832	0.540803	0	0.214418	0.176163	0	0.09178	0.070609	0	0
Srarp	0.0146991	1.07325	4.51059	2.45985	3.16915	3.1516	4.65196	6.45599	1.8536	1.46657	2.10972	2.37744	1.69964	2.08866
Gfy	0.0147275	3.79147	0.286187	0.995128	0.238639	0.728432	0.345861	0.441708	0.013958	0	0	0.044756	0.160541	0
Fabp4	0.014809	2.46372	0.59058	0.304231	0	0.70739	0.416339	0.21035	0.115214	0	0	0.161627	0.060235	0.066973
Lrrc36	0.0150635	1.33148	2.1748	4.51823	2.00032	2.51763	2.10113	2.76043	1.12384	0.974912	1.57193	0.779159	1.10102	0.835728
Dio3	0.0151037	1.13033	1.50195	0.805688	1.94418	1.366	1.49636	0.943914	0.724653	0.459061	0.423906	0.672625	0.55832	0.842471
Ctla2b	0.0153443	1.04093	0.701977	0.909692	0.995907	1.48676	0.494871	0.984481	0.179741	0.229454	0.530652	0.900535	0.642138	0.226378
Twist1	0.0154336	1.16026	2.33717	3.80925	2.57483	2.70906	2.2914	1.79443	1.31576	0.849952	0.759835	0.965793	1.39237	1.65869
Hpn	0.0158967	1.16156	0.383396	0.610367	0.682475	0.299231	0.448552	0.610144	0.267352	0.091419	0.208934	0.113856	0.39312	0.28168
Tcf21	0.0161117	2.33867	0.042909	0.116046	0.020871	0.157399	0.136121	0.080236	0	0	0.022896	0.017615	0.068928	0
Rpl36a-ps1	0.016288	1.89114	1.68361	3.08613	1.74707	1.70572	1.12755	0.699604	0.517306	0.188681	0.778597	0.737222	0.420709	0.066824
Iqank1	0.0168578	1.13669	0.655805	1.59171	0.993792	1.08386	1.18692	0.801814	0.335838	0.296808	0.834473	0.445244	0.553756	0.405457
Efna4	0.0172175	1.63424	0.352174	1.4763	0.650954	0.97812	1.1917	1.7122	0.216418	0.236807	0.281882	0.563832	0.414871	0.335472
Vegfd	0.0174497	1.49916	0.65178	1.14189	1.16047	1.89466	0.871285	1.08847	0.226716	0.56506	0.4331	0.222129	0.698014	0.263577
Twist2	0.0174512	1.07314	0.20788	0.642525	0.317795	0.217872	0.47105	0.277657	0.091247	0.266251	0.158465	0.21944	0.190822	0.088402
Bub1	0.0175071	1.67178	0.014208	0.038426	0.069111	0.089346	0.075122	0.141696	0	0.039807	0.015163	0.011665	0	0.067671
Rgs18	0.017702	1.46223	0.198508	0.089477	0.120697	0.130031	0.183673	0.154664	0	0.027808	0.026481	0.122235	0.053147	0.088638
Gmfg	0.018028	1.22676	2.27947	2.591	1.73547	3.29791	3.30124	2.03855	1.01506	0.805248	2.16825	0.976439	0.928704	0.619548
Fam229a	0.0183624	2.02114	1.67084	1.62838	1.274	2.8397	1.38481	0.39406	0.508757	0	0.578313	0.333682	0.628694	0.215081
Hrct1	0.0183717	1.2496	0.763578	1.20463	1.40126	1.98251	1.63324	1.81724	0.817604	0.739043	0.481529	0.370452	0.260191	1.03319
Bpifa1	0.0185413	3.85671	4.92545	7.1603	2.0309	5.19638	0	3.57835	0.434307	0.329	0.104433	0.133905	0.384259	0.194199
Ppef2	0.0187268	1.47933	2.99876	1.08896	1.06009	1.07124	1.71504	1.90601	0.449885	0.520669	0.351582	0.478543	0.73276	0.995768
Bhlha9	0.0188292	1.18489	1.54487	2.616	1.32012	2.01297	1.08172	1.06703	0.940799	0.748678	0.891186	0.445647	0.693082	0.522021
Apom	0.0191874	5.18442	0.074624	0.313942	0.483979	0.182492	0.368253	0.062018	0	0	0	0.040846	0	0
Lgals7	0.0192051	2.52047	0.217459	0.686134	0.819763	0.79769	0.229952	0.237201	0.111361	0.060926	0.232074	0	0.116442	0
H4c1	0.0192936	3.57874	0.093499	0.758603	0.500276	0.979935	0.54379	1.34041	0.095762	0.157176	0.049892	0	0.050066	0
Asic3	0.0193861	1.92654	0.605248	0.389734	0.240329	0.789688	0.313479	0.323361	0.037953	0.083056	0.210914	0.15212	0.039685	0.176493
Rps18-ps5	0.0195822	1.65824	12.4122	14.9693	12.3577	3.9157	8.77948	3.726	3.01871	2.27961	3.58849	2.48805	4.0456	2.37262
Smim24	0.0196476	1.30075	4.69189	2.89854	1.99259	2.54607	2.14072	2.37522	0.80497	0.800734	1.19461	1.62299	1.19879	1.13436
Tnni2	0.0197723	1.48847	0.408479	0.621409	0.298037	0.347842	0.269967	0.891127	0.156887	0.171667	0.163474	0.251529	0.054682	0.212793
Arsi	0.0200439	1.15692	0.635245	0.687205	0.453192	0.488238	0.358262	0.274527	0.251572	0.208828	0.225979	0.090403	0.199556	0.32273
Cebpe	0.0207803	3.66176	0.142133	0	0.079012	0.085122	0.042942	0.177184	0.041592	0	0	0	0	0
Cyp2f2	0.0208473	1.81082	3.54011	4.74816	1.84797	4.05716	2.38914	1.57868	0.41269	0.483824	0.476093	0.838875	1.67985	1.28514
Nms	0.0208671	1.28724	2.36625	2.49626	1.88566	1.60935	1.27772	1.06695	0.644551	0.677064	0.376106	0.620029	1.34793	0.719372
Prdm8	0.0209666	1.18566	3.86312	3.98386	5.90774	3.81876	4.16243	2.16164	0.944189	1.12334	1.69439	2.27067	1.6768	2.79652
Rdh9	0.0210582	1.44369	0.252683	0.227792	0.163879	0.353104	0.148444	0.122499	0.079077	0.031464	0.164795	0.080679	0.060135	0.050146
Ltb	0.0213532	1.41072	0.855622	1.19558	2.16418	1.18819	1.90003	1.17329	0.48198	0.647248	0.273938	1.00105	0.503973	0.280171
9530053A07Rik	0.0222398	1.20844	0.088994	0.126072	0.083485	0.113259	0.053775	0.059433	0.029297	0.014248	0.064447	0.049581	0.020423	0.049199
Msr1	0.0226587	1.7044	0.161287	0.178954	0.156906	0.104025	0.091837	0.046399	0	0.055616	0.026481	0.045838	0.03986	0.059092
Map3k7cl	0.0229619	1.22513	0.579616	0.536272	0.445161	0.799311	0.887115	0.114088	0.249955	0.119658	0.146504	0.27551	0.392041	0.25427
Alx3	0.0229742	1.5309	1.172	1.64486	0.557126	0.893336	0.999918	0.630901	0.450137	0.149256	0.454825	0.153085	0.48494	0.348881
1600014C23Rik	0.023124	2.04469	0.09729	0.350825	0.757175	0.764746	0.514396	0.606414	0	0.327095	0.155743	0	0.208382	0.057922
Emx1	0.0231872	1.54228	0.516552	0.844026	1.57037	0.727481	0.904691	0.362217	0.181862	0.108543	0.430678	0.543383	0.138298	0.288313
Sec1	0.0231953	1.67645	0.439126	0.558875	0.452326	0.365479	1.13357	0.740627	0.158736	0.260536	0.248102	0.127247	0.08299	0.276816
H4f16	0.0234434	1.52904	0.052808	0.158686	0.068498	0.092243	0.148911	0.175549	0.072114	0	0	0.028904	0.056554	0.083839
Mcpt4	0.0235231	1.39952	0.227419	0.902077	0.442483	1.12025	0.673357	0.340205	0.046585	0.356813	0.339785	0.298748	0.146131	0.216634
Tmsb15b1	0.023527	2.11723	0.668975	0.134017	1.08467	1.01274	0.393005	0.926615	0.228388	0.249904	0.079326	0.061027	0	0.354027
Dapl1	0.0238969	1.69752	5.93769	7.25973	4.33229	3.73385	3.76729	1.8505	1.63437	0.582252	0.950511	1.43203	1.391	2.29779
Adam32	0.024105	1.55954	0.320867	0.515244	0.156075	0.756651	0.434729	0.487496	0.071888	0.179796	0.246122	0.148185	0.12886	0.131334
Gm12689	0.024489	1.35002	1.90979	1.28707	0.847783	2.25421	2.13715	0.947683	0.645671	0.540264	0.554057	0.532811	0.436851	0.971426
1810024B03Rik	0.0245478	1.26408	0.198745	0.543903	0.428124	0.252934	0.615478	0.566305	0.167206	0.167049	0.318154	0.128209	0.076015	0.228198
1700066B19Rik	0.0245967	1.6157	0.108965	0.065487	0.07067	0.047584	0.096021	0.090558	0.0093	0	0.019381	0.059642	0.068071	0
Capn9	0.0247313	1.48329	0.208766	0.517555	0.162476	0.273501	0.33114	0.429413	0.138982	0.105283	0.178237	0.042851	0.122966	0.099433
Upk2	0.0247744	1.58327	0.186135	0.2517	0.181079	0.268238	0.246036	0.522087	0	0	0.248306	0.038206	0.099669	0.166226
Smim38	0.0249184	1.96079	0.598658	0.834063	1.16479	1.19783	0.489176	0.508838	0.05574	0.060992	0.087122	0.178733	0.233136	0.615629
Alox12	0.0252162	1.21039	0.407117	0.47823	0.150022	0.555984	0.371801	0.384483	0.13899	0.041477	0.144826	0.162063	0.277452	0.249726
Afm	0.0254514	1.83976	0.0172	0.186069	0.133862	0.126187	0.054565	0.085767	0.035233	0.028914	0.055068	0.049426	0	0
Fam71f2	0.0256142	1.86774	1.08612	0.996938	1.44084	0.807179	0.417644	0.344648	0.161805	0.331966	0.126449	0.178347	0.338376	0.258653
Apoa4	0.026178	2.4364	0.413083	0.620654	0.133954	0	0.339745	0.114434	0.047009	0.154313	0	0	0.098308	0
Ascl2	0.0265489	1.44528	0.403666	0.643828	0.347389	0.195262	0.886549	0.658051	0.159013	0.208793	0.231967	0.203951	0.199523	0.147893
Mrap	0.0269436	1.94327	0.765027	0.517251	0.294597	0.668165	0.421343	0.27816	0	0	0.238129	0.11777	0.238961	0.1708
Mslnl	0.0271103	3.15597	0.059664	0.448223	0.135434	0.093798	0.241851	0.223133	0	0	0.021225	0	0.042597	0.071043
S100a7a	0.0273919	1.63525	0.365985	0.527894	1.08593	0.115073	0.774022	0.43343	0.112452	0.082031	0.234349	0.120193	0.274362	0.239682
Birc7	0.027467	1.57335	0.40642	1.46554	1.70638	1.09852	0.746442	1.22662	0.613429	0.239722	0.319594	0.509304	0.297802	0.254701
Gm3417	0.0277529	2.54326	0.441211	1.06067	0.667684	0.205519	0.15552	0.122227	0.05021	0.21976	0.104636	0.080499	0	0
Gm8374	0.0279691	2.6371	0.224983	0	0.145914	0.117898	0.039651	0.093489	0.038405	0	0	0.061572	0	0
Timp1	0.0281223	1.37704	1.7877	1.0744	1.18703	1.45727	3.48075	2.12245	0.726572	0.508815	0.393683	1.35126	0.790115	0.506821
Cacna1f	0.0284382	2.04928	0.093848	0.056402	0.205421	0.106555	0.02481	0.058496	0.03204	0.004382	0.033385	0.025684	0.008375	0.027937
Gm17455	0.0284465	1.28395	3.49098	7.73762	2.04279	3.57625	4.38544	2.84673	1.15598	1.70612	1.4006	1.72402	2.2769	1.62521
Ccl27b	0.0285941	1.89766	2.47158	4.02148	1.7007	1.32678	0.956186	2.40476	0.802636	0.270232	0.321669	1.23734	0.322793	0.502456
Cox8b	0.0287096	2.06808	2.65979	2.39779	0.749025	0.953667	1.77638	1.74512	0.143377	0.156884	1.12048	0.114935	0.749597	0.166688
Fbxw10	0.0288489	1.11042	0.898559	1.53009	0.627595	1.44885	0.633455	0.737197	0.715792	0.395917	0.4262	0.4603	0.238518	0.48467
Ccl17	0.0292121	1.13746	1.6668	1.5468	1.28768	0.924837	0.570239	0.427793	0.251049	1.20868	0.418546	0.563495	0.420007	0.058373
Itgb1bp2	0.0297262	3.07378	0.498592	0.535916	0.074623	0.502459	0.709741	0.071717	0.058922	0	0.061396	0.031489	0.041074	0.091336
Batf3	0.0299947	1.3082	0.917314	0.810078	0.582789	1.17723	0.217758	1.05019	0.440996	0.797244	0.159831	0.245923	0.120292	0.156038
Cby3	0.0300142	1.11479	0.495468	0.414757	0.447579	0.519283	0.149695	0.573538	0.108741	0.158647	0.339921	0.319623	0.189505	0.08428
Clec1b	0.0308868	1.81366	0.55482	0.250084	0.089958	0.242287	0.366684	0.40346	0.047354	0.155445	0.098685	0.07592	0	0.165159
Gtsf1l	0.0310032	3.03127	0	0.16581	0.835011	0.514048	0.583483	0.535002	0.062793	0.103063	0.06543	0.025168	0.065658	0
Myo1g	0.0313578	1.30775	0.430736	0.349476	0.188566	0.248292	0.447891	0.205835	0.102937	0.080454	0.183874	0.141458	0.08457	0.162414
Ly6g6d	0.0316817	1.20888	0.359972	1.69468	1.59533	1.59294	1.6072	2.39331	0.737367	0.448241	0.811015	0.788126	0.642511	0.571501
Prss57	0.031705	1.34482	0.179346	0.323359	0.508881	0.297613	0.284474	0.074525	0.137764	0.200991	0.095699	0.122706	0.064022	0.035592
1700056E22Rik	0.031732	1.18597	0.554674	1.28581	0.46252	0.809717	0.544645	0.345732	0.202892	0.310809	0.253694	0.52046	0.21215	0.259467
1700093K21Rik	0.0327028	1.73232	0.125551	0.294277	0.097712	0.315806	0.053106	0.125211	0.025718	0.028141	0.066994	0.113389	0.040337	0.029899
Accsl	0.032951	2.04105	0.260887	0.081099	0.323813	0.150856	0.16172	0.044859	0.055283	0	0.038403	0.022158	0.057805	0.074983
H2-Oa	0.0331192	1.65108	0.394233	0.325783	1.02273	0.826365	0.833764	0.163819	0.100943	0.184089	0.280486	0.053946	0.281465	0.23471
Eqtn	0.033161	1.65828	0.156631	0.070601	0.609505	0.38988	0.476186	0.829849	0.060158	0.153593	0.271632	0	0.083871	0.23313
Rbp7	0.0332475	1.86244	0.386043	0.379654	0.546263	0.845978	0.333999	0.087499	0.071888	0.196652	0.299627	0.057628	0	0.083576
Rpl3l	0.0332894	1.09769	0.383415	0.138259	0.64156	0.450066	0.340572	0.401495	0.204201	0.189063	0.278245	0.113326	0.279217	0.036523
Tmem40	0.0334446	1.19897	0.161432	0.449821	0.114216	0.246097	0.2483	0.256128	0.135277	0.131575	0.062648	0.072295	0.031433	0.209695
Stkld1	0.0343427	2.36318	0.149509	0.269564	0.402778	0.120535	0.072969	0.51613	0.058895	0.051555	0.049095	0.009442	0.073899	0.054776
Ear2	0.0357889	2.35069	0	0.315938	0.068188	0.220383	0.296475	0.174755	0	0.078551	0.074803	0.057547	0	0
Hspb2	0.0364074	1.11009	0.779322	0.585462	0.379075	0.13613	0.686745	0.485756	0.177373	0.533731	0.092411	0.177735	0.278201	0.154659
Cytl1	0.0366134	1.21483	8.58907	5.78393	6.21647	9.38152	3.03663	3.41858	2.33171	2.78333	1.27003	2.78251	2.79829	3.72737
Gm49380	0.036663	2.34036	1.72196	0.310468	0.670074	0.300789	0.789053	1.50263	0.058788	0.128652	0.367538	0.094252	0.122941	0.273383
Cldn14	0.037676	1.06989	1.33743	0.714875	1.32412	1.69942	2.02753	1.47545	1.03037	0.795844	0.922068	0.670499	0.329555	0.33823
Muc3a	0.0378529	1.01289	1.56236	1.87795	3.46853	2.81307	1.24262	2.2473	1.17619	0.763222	0.89781	0.866124	1.15836	1.68543
Sctr	0.0380141	1.57526	1.05201	2.50643	0.974694	0.446279	0.980011	0.858684	0.513078	0.463168	0.173753	0.257061	0.523078	0.357898
Dppa5a	0.0380811	1.08329	1.83185	3.3395	1.14845	1.96256	1.2053	1.67464	0.625392	1.04928	1.08609	0.501332	1.13348	0.872485
Cd3g	0.0382552	2.25917	0.049263	0.177642	0.239624	0.129077	0.15628	0.061412	0	0	0.052574	0	0	0.117317
Sytl3	0.0387135	1.5495	0.210752	0.201867	0.076885	0.296811	0.090537	0.155994	0.026982	0.095951	0.070286	0.021629	0.028213	0.109789
Cldn9	0.038774	1.25964	0.698491	1.6057	0.866383	1.48243	0.775551	0.565986	0.447121	0.273977	0.409989	0.372762	0.542328	0.457438
Slc3a1	0.0391807	1.7064	0.060355	0.176831	0.088073	0.316278	0.095733	0.131668	0	0.152187	0.032205	0.049553	0.032318	0
Kcnk7	0.0394845	1.27778	0.482722	0.275608	0.344379	0.77575	0.459409	0.481414	0.148321	0.342621	0.206066	0.105687	0.206785	0.153276
Adamts13	0.0404193	2.9556	0.051164	0.138371	0.179185	0.166231	0.054103	0	0	0.028669	0	0.016803	0	0.030461
Rho	0.0406123	1.09846	0.49329	0.363019	0.381953	0.179368	0.330011	0.276096	0.077331	0.180514	0.064462	0.103318	0.231797	0.287691
Tex33	0.0415968	2.39314	0.081219	0.109827	0	0.063842	0	0.25312	0	0	0	0	0	0.096708
Tmem171	0.0418204	2.96308	0	0.114799	0.061942	0.016683	0.134659	0.039687	0	0	0	0.013069	0.034094	0
C2cd4b	0.0419444	1.15007	0.791939	1.81727	0.735406	0.60364	1.02776	0.852618	0.774235	0.403417	0.499415	0.118219	0.616811	0.214313
Treml1	0.0423605	2.00926	0.201584	0.181728	0.352995	0.359166	0	0.653374	0.144524	0	0	0.033101	0.064765	0.192024
Eci3	0.0424422	2.19638	0.505127	0.595483	0.472505	0.122171	0.082176	0.145315	0.079592	0.087091	0.041467	0.095705	0	0.115666
Npm2	0.042476	2.11589	0.556025	0.911372	1.62276	0.503285	0.481066	0.252054	0.077656	0.283242	0.134862	0.207506	0.054133	0.240753
Smco1	0.0428411	1.27721	0.142968	0.080553	0.278168	0.1873	0.037795	0.222782	0.109821	0	0.133504	0.029345	0.076555	0.042559
Spatc1l	0.0433075	2.25763	0.105255	0.303638	0.020479	0.088251	0.311646	0.052485	0	0.094367	0.044932	0	0.045089	0
Muc2	0.0433621	1.19541	0.15203	0.159365	0.199493	0.133399	0.089729	0.167485	0.036211	0.039623	0.056598	0.034834	0.159028	0.067358
Tpsb2	0.0434562	1.24898	0.711363	0.741047	0.307573	0.662716	0.26746	0.453251	0.161906	0.177159	0.202446	0.11681	0.2878	0.376459
Batf2	0.0445	2.19996	0.085927	0.096828	0.146287	0	0.181727	0.214235	0.022002	0.072223	0.022925	0.017637	0.023006	0
Tcp10c	0.0445373	1.50357	0.009596	0.060553	0.084014	0.03017	0	0.05981	0	0.021507	0.040962	0.023635	0	0
Kcnq1	0.0448441	1.08978	0.076127	0.165852	0.172804	0.192817	0.080501	0.071176	0.019492	0.078205	0.148946	0.010417	0.054351	0.045323
Gm6569	0.0450098	2.01816	1.06923	0.38556	0.173363	1.08326	0.226131	0.533164	0.146013	0.039942	0.152145	0.204835	0.229014	0.084876
Spon2	0.0453665	1.5849	1.44124	1.32057	0.459701	0.1981	0.324795	0.441804	0.411377	0.344219	0.063037	0.077593	0.189771	0.309463
Tmem217	0.0456105	1.06248	0.135255	0.121932	0.105265	0.085054	0.028605	0.067444	0.055411	0.030316	0.072173	0.044419	0.05794	0
Tescl	0.0462068	1.3646	0.058943	0.31882	0.200696	0.247104	0.498633	0.514352	0	0.19817	0.125808	0.193575	0.126248	0.070184
Phldb3	0.0463451	1.36993	0.177077	0.151652	0.31008	0.491809	0.168525	0.220747	0.154158	0.099224	0.08504	0.079962	0.085337	0.08434
Mgarp	0.0464946	1.36693	0.34892	0.369254	0.309924	0.254394	1.02669	0.491703	0.217525	0.068005	0.19428	0.161919	0.227451	0.216764
Htra4	0.0466089	1.70961	0.68986	0.916493	0.847731	0.05708	0.326352	0.339469	0.037187	0.162762	0.232492	0.089431	0.233304	0.216166
Fam24b	0.0475237	3.36615	0.296448	1.00217	0.360493	1.08744	0.235109	0.092389	0	0	0.237278	0.060848	0	0
Wdr95	0.0486296	1.15109	0.759219	1.4193	0.536452	0.644945	0.811287	0.508095	0.360147	0.304514	0.400857	0.465864	0.12838	0.44725
Six1	0.0489255	1.03401	0.804866	1.23349	0.72148	0.463954	0.474188	0.609181	0.370954	0.315702	0.171792	0.217126	0.541803	0.48603
Fam25c	0.0498222	3.09407	0.12352	0.389734	0.120164	0	0.261232	0.230972	0	0	0.131821	0	0	0
Tsx	0.0499496	1.61559	0.310321	0.335704	0.362269	0.292713	0.13126	0.7737	0	0.243441	0.198706	0.203826	0	0.073901
			Arrhythmic in AR_Ctrl_Early						Rhythmic in AR_Ctrl_Late
Gene	pvalue	log2FoldChange	ZT0	ZT4	ZT8	ZT12	ZT16	ZT20	ZT0	ZT4	ZT8	ZT12	ZT16	ZT20
Cdc5l	1.29225e-09	-1.14783	7.15901	7.82713	8.0983	7.8172	8.89951	7.24339	16.7278	17.6227	17.4124	17.3394	18.1597	16.9794
Clcn3	1.87461e-09	-1.73805	7.63232	8.62973	8.97279	8.69961	8.69318	9.0838	28.0674	29.3456	29.4121	28.8003	28.2014	28.6745
Ssx2ip	2.07357e-09	-1.30978	8.9652	9.50483	9.72801	10.0286	10.6022	9.6138	23.2406	23.8844	24.6836	24.7062	24.8053	23.5609
Dzank1	4.05817e-09	-2.21439	13.1473	13.7471	14.509	13.3783	12.4966	16.2715	61.2903	66.0112	64.6299	64.9601	63.2873	67.5639
Rtf1	5.6192e-09	-1.58753	4.88469	5.27283	5.70547	5.97549	5.26562	4.723	15.4782	15.8144	16.5218	16.9634	15.3324	15.5415
Csnk1a1	6.28835e-09	-1.40491	9.38005	11.1416	10.9321	11.2149	10.1532	11.8278	26.567	29.7732	28.7191	29.0797	28.0956	28.9589
Trim44	8.14591e-09	-1.13489	22.6805	24.571	23.467	23.2186	24.7812	24.1059	50.9802	51.661	51.9776	51.4001	53.5503	54.0759
Pja2	8.68428e-09	-1.78829	27.9677	33.6618	33.7915	32.5157	30.2716	34.4077	103.803	116.275	111.084	111.18	107.367	115.597
Atl1	1.29854e-08	-1.46678	8.16132	11.0361	11.7043	9.89366	10.5001	10.0638	26.5183	28.2087	29.2505	28.422	29.3745	27.8254
Zyg11b	1.38824e-08	-2.0769	4.58223	5.09514	5.3764	5.00392	4.48906	5.53169	20.8323	22.1206	21.0471	20.5694	20.2048	22.1264
Abat	1.49401e-08	-1.32286	46.3882	51.1783	47.603	47.3925	55.324	51.5492	125.116	122.988	119.275	123.001	132.053	126.636
Acbd3	1.50464e-08	-1.43629	5.40114	5.78533	5.18379	4.77055	5.22013	5.24895	14.1196	15.344	13.992	13.679	13.9476	14.4616
Slc4a4	1.90564e-08	-2.05654	5.45183	5.8208	6.58208	6.51784	5.89671	6.72426	25.1406	26.6744	25.698	25.2575	25.4187	25.699
Washc2	1.94082e-08	-1.80355	5.69803	5.90382	6.25683	5.33843	6.981	6.11566	20.4948	21.8535	20.5851	20.7991	21.65	21.3115
Tnpo3	1.96897e-08	-2.26159	2.23407	2.8541	3.6203	2.91711	3.11291	3.19277	14.1902	14.1369	14.2723	14.4712	14.2165	14.6969
Tsr1	2.01994e-08	-2.98195	0.923666	0.944382	1.09582	0.991675	0.809973	0.533601	7.18743	6.93041	6.75595	7.26911	7.057	6.66602
Gosr1	2.16895e-08	-1.41313	5.05841	5.74651	5.56684	5.38776	5.98271	6.53292	15.1935	15.2159	14.7781	14.6926	15.7295	15.67
Wdr37	2.25891e-08	-1.23798	4.62269	5.54664	6.03635	5.474	4.98141	5.44956	11.5373	13.2714	13.4075	12.8833	12.0149	12.6246
Lsamp	2.32181e-08	-1.66457	5.9932	7.45101	7.93525	7.25245	7.23535	7.57887	21.6022	22.5891	23.2608	23.4635	22.4908	24.3266
Pcdhga5	2.32882e-08	-3.07455	0.336634	0.37488	0.308225	0.30093	0.460672	0.086399	2.6467	2.81837	2.53594	2.70696	2.70385	2.32249
Vezf1	2.53261e-08	-1.23082	5.31783	4.42865	4.43812	5.44142	4.46508	5.46181	11.7793	11.508	11.2452	12.109	10.8505	11.8685
Phf20	2.70087e-08	-1.45892	4.21556	4.06145	4.58308	4.22244	4.61494	4.65173	11.36	11.892	12.26	12.3454	12.3233	12.2539
Fgf14	2.75903e-08	-1.52706	1.79986	2.67179	2.62954	2.28631	2.10502	2.58465	6.45521	6.85667	7.17425	6.80907	6.36836	6.90648
Ubr3	2.97628e-08	-1.87398	3.80343	3.71159	5.6624	5.03512	4.22756	5.11633	16.0253	15.5303	17.8604	18.2042	16.5761	16.8094
Gja1	2.99984e-08	-1.29415	14.7566	17.3851	17.3519	15.5845	13.3405	14.3904	36.086	39.9147	41.183	36.9973	36.0817	37.3343
Kif1b	3.073e-08	-1.63385	15.2636	15.3894	16.7007	15.591	16.384	16.622	50.1362	48.9243	48.1789	48.4287	49.9722	52.1334
Ttc9c	3.27789e-08	-1.52537	3.16532	3.34979	3.88264	3.59221	3.70753	3.39857	9.55796	10.0324	10.6237	10.1693	10.738	9.6059
Lrp6	3.71155e-08	-1.48668	1.7093	1.62773	2.00897	1.78304	1.74527	2.05413	4.96979	4.8864	5.26983	4.84045	5.24813	5.41151
Rac1	3.7974e-08	-1.47085	46.4903	48.1324	49.2176	41.6607	52.8528	50.4147	130.172	138.02	128.851	129.985	139.838	133.556
Map7d2	3.87657e-08	-1.88763	13.5498	13.6097	16.5367	14.8356	14.1085	13.8729	53.6009	53.1412	54.0441	55.0968	50.173	54.0665
Dhx9	3.89914e-08	-1.47287	9.65317	10.3212	11.128	11.2281	11.2416	12.0209	29.128	29.5655	28.9893	31.0895	30.7988	32.4975
Sgtb	4.13627e-08	-3.04818	2.66581	2.34406	2.8248	2.56183	3.60827	3.09828	23.9512	24.4611	22.3571	22.5335	24.0339	24.1339
Lancl2	4.47801e-08	-1.14954	7.00873	7.98067	8.0359	9.40938	7.64961	8.22751	17.5357	17.4672	17.2925	19.0579	17.5227	18.3003
Rnf19a	4.70203e-08	-1.44455	2.16953	2.74252	2.57044	2.38814	2.67867	2.86321	6.59782	7.04961	7.1465	6.54781	7.00922	7.59837
Lmbrd1	4.80473e-08	-1.29356	12.064	13.7172	14.2258	14.0597	13.4784	12.5215	30.9813	33.6452	32.8104	32.3355	33.3881	33.1093
Prrc1	4.96592e-08	-1.16283	1.93977	1.88944	2.68333	2.22143	2.32137	2.10555	4.8311	4.47501	5.30661	5.03418	4.92994	4.88984
Klhdc7a	5.21054e-08	-1.16819	1.98984	2.04714	1.82771	1.90399	1.97632	1.95919	4.4374	4.45632	4.05884	4.40485	4.40893	4.53636
Nalcn	5.22626e-08	-1.71674	5.41264	6.1071	6.60045	6.51107	5.55225	6.45951	18.5093	19.9324	20.0261	20.5581	20.0997	21.3175
Eaf1	5.3123e-08	-1.75459	2.1846	1.97844	2.08626	1.64369	2.22004	1.91759	7.0511	6.68217	6.66808	6.6191	6.65381	6.92074
Prune2	5.40685e-08	-1.26748	3.0173	3.83593	3.95904	3.56845	3.28386	3.6126	8.2233	9.11739	8.6372	8.39685	8.13636	8.71184
Mecp2	5.76281e-08	-1.54639	4.83963	4.82759	4.70816	4.86216	5.05711	5.19422	14.2079	13.7786	13.9335	13.962	14.9661	15.2846
Ywhab	5.93501e-08	-1.33268	71.3995	74.0451	84.413	72.6605	77.4002	82.9424	183.181	193.349	200.661	198.998	196.048	193.57
Osbpl11	5.96831e-08	-1.45579	1.92845	1.77366	1.87064	2.33074	2.14533	2.3415	5.42301	5.18437	5.37117	5.94428	5.8197	6.24498
Mfsd4a	6.359e-08	-1.40875	1.28873	1.29088	1.49468	1.02619	1.28502	1.30744	3.40088	3.49575	3.63455	3.28547	3.33226	3.27641
Dnm3	6.37056e-08	-2.3703	4.95147	5.31967	6.20968	5.58627	5.96158	5.96976	29.5856	30.0789	29.0002	27.8936	28.5852	30.6448
Nkrf	6.79443e-08	-1.81658	2.82359	3.14231	3.35309	3.4083	2.76616	3.60084	10.8164	10.8243	10.9658	11.6925	10.6705	12.289
Fbxo28	6.82912e-08	-1.08179	5.54909	5.60535	5.36855	5.6446	5.11753	5.28841	11.6229	11.2305	11.1467	11.9117	11.3278	11.7073
Dnajc6	6.84572e-08	-2.38346	8.18958	8.78201	12.2485	10.9095	9.36152	11.2376	52.613	54.2387	52.5579	51.0854	52.6094	53.7699
Napb	6.86547e-08	-1.68419	23.4333	28.9046	31.2309	28.2169	27.6603	30.3728	86.6832	94.024	96.3573	92.9848	85.2196	90.4602
Lclat1	7.09802e-08	-1.10921	3.21798	3.53225	3.76168	3.94466	4.2141	3.83186	7.70438	7.8532	7.86855	8.08256	8.5136	8.52172
Tspyl4	7.10188e-08	-2.33584	40.5487	44.4246	52.3186	41.9834	47.1186	54.4279	238.206	246.148	245.846	227.537	226.676	233.304
Tbc1d14	7.29579e-08	-1.07194	5.20877	4.67662	5.3347	5.53671	6.1751	5.3247	11.2796	10.9995	11.3922	11.2267	11.6509	11.263
Cltc	7.69398e-08	-1.65716	25.672	27.159	29.9638	26.0017	28.255	28.7995	83.5711	87.888	84.8477	85.0029	89.058	92.7186
Ids	7.70785e-08	-1.40246	30.0095	31.0925	36.4556	35.164	30.0306	36.0308	80.6666	87.076	87.897	89.7128	87.183	92.9524
Cpeb3	7.81991e-08	-2.7704	1.93008	1.47227	1.62237	1.62118	1.69411	1.78195	11.5778	11.5503	10.8922	11.0585	11.5219	12.4612
Xpr1	7.87391e-08	-1.90506	4.00104	4.19805	4.76752	4.30187	3.97058	4.56613	15.2604	16.4351	15.8472	15.877	16.6417	16.5854
Creg2	8.18011e-08	-1.76632	3.16681	3.96167	4.53112	4.18708	3.86909	4.71912	13.0187	14.0268	14.0853	14.2842	12.7362	14.9729
St8sia1	8.18026e-08	-2.13798	1.40081	1.66317	1.96546	1.81578	1.71898	1.52755	7.6424	7.21648	7.60348	7.2247	7.32178	7.40956
Enpp4	8.18338e-08	-1.04172	4.09469	3.90555	4.6823	3.97297	3.97348	4.35363	8.29133	8.608	9.37666	8.24356	8.21992	8.69189
Gpam	8.1848e-08	-1.5432	4.027	4.16209	4.62756	4.72782	5.63782	5.00597	13.2215	13.3653	13.5709	14.0509	13.7114	14.232
Hspa4	8.33112e-08	-1.67147	14.634	15.9999	17.5064	15.1468	16.4607	17.2201	51.4915	54.2736	51.6238	48.7409	50.6259	52.125
Tmcc3	8.58228e-08	-1.10562	6.96087	6.75816	6.33326	6.85788	6.16915	6.51735	14.2473	14.2231	13.8125	14.1148	14.478	14.3332
Fnbp1	8.99633e-08	-1.16953	10.2903	9.33324	11.0152	10.5479	11.0329	10.714	24.0762	23.101	23.8619	22.9902	23.2484	24.2842
Ulk2	1.03381e-07	-1.20946	6.85917	6.8106	6.22989	6.11959	5.84003	7.4313	14.8793	15.2795	14.8068	15.074	15.1429	15.6771
Pik3r3	1.04374e-07	-1.51261	4.54991	4.86464	4.07942	4.51448	4.77612	3.95913	12.3196	13.3683	11.8374	12.6667	13.2585	12.8563
Samd8	1.04441e-07	-1.46589	3.15907	3.46476	4.19079	3.54873	2.92439	3.35913	9.16547	9.9018	9.75088	9.41118	9.05212	9.75219
Ric3	1.04771e-07	-1.16347	5.70556	7.10513	6.95589	6.66539	6.54254	6.28585	14.5346	14.5752	15.2516	14.6537	14.5654	14.3609
Miga1	1.07849e-07	-1.4999	4.01135	4.3899	5.31834	4.53125	4.10525	5.31922	11.7218	13.4774	13.5262	13.039	12.4958	14.012
Agfg1	1.08961e-07	-1.32213	4.60118	4.26467	5.12945	4.34263	4.68402	5.82598	12.1175	12.1522	12.1539	11.254	11.6449	12.8076
Usp32	1.10432e-07	-2.04809	3.70376	4.19241	4.40272	4.12531	3.20511	4.56528	15.1096	17.6641	17.3318	16.5085	16.0479	17.3969
Tmcc1	1.12088e-07	-1.22507	3.30088	3.64312	4.05366	4.6839	4.95567	3.81011	9.32838	8.93988	9.42291	9.86737	10.2705	9.32059
Stk4	1.1223e-07	-1.12823	2.48111	2.82592	2.84457	2.95189	2.79189	3.01793	5.72529	6.23094	5.90146	6.37242	6.11548	6.62541
Ntrk2	1.15131e-07	-1.25606	21.4753	23.9669	21.5958	21.7377	24.7494	23.1672	54.2768	52.7785	51.7139	54.1067	58.0668	55.5357
Abca1	1.16012e-07	-2.25878	0.902102	0.944762	0.735667	0.925075	0.776513	1.24279	4.2212	4.32458	4.35434	4.20035	4.33309	5.01752
Crim1	1.16693e-07	-2.35897	3.13259	3.69443	4.17882	3.67445	2.78618	3.79279	17.6726	17.3513	18.1445	18.3454	18.7639	18.783
Ctcf	1.16708e-07	-1.05732	6.73249	7.72408	8.09208	7.93172	7.42882	7.95189	15.6646	15.9238	15.9189	16.3173	15.9745	15.6409
Slc38a1	1.18567e-07	-1.76281	7.80722	9.02249	9.08586	9.1515	9.48407	8.73797	30.2638	29.8671	28.905	29.1675	31.8885	30.7498
Rnf130	1.21203e-07	-1.34678	7.90251	8.96718	8.06598	6.80039	8.99734	8.85174	21.739	21.5953	20.9338	20.0149	21.0462	20.7873
Clint1	1.24191e-07	-1.48808	3.45027	3.15562	3.30774	3.33824	3.48179	4.03317	9.57748	8.99816	9.97584	9.99851	9.73825	9.96572
Mapk9	1.25172e-07	-1.46316	12.7179	13.8593	14.2586	12.6908	16.4454	15.2338	38.1183	38.55	38.6645	40.2635	40.1759	39.15
Aebp2	1.32256e-07	-1.15185	3.35364	3.40153	3.26253	3.40954	3.04326	3.96705	7.47786	7.34789	7.85808	7.58587	6.98686	8.15535
Smc1a	1.34617e-07	-1.17988	6.77356	7.70918	7.67126	6.4686	7.41263	7.40608	15.3054	17.6864	16.4411	16.0135	16.5675	16.4058
Timm29	1.34728e-07	-1.0757	14.7585	12.9265	13.6453	13.2176	16.9287	14.0601	31.0318	28.1562	28.8933	30.1848	33.3816	28.6422
Map1b	1.36716e-07	-2.08093	13.1158	13.9114	18.2489	15.7949	13.8333	18.0272	65.3157	64.5577	64.3533	62.55	66.5638	69.8325
Hbegf	1.37818e-07	-1.3486	3.10865	2.22855	2.5907	2.46857	3.17505	2.57911	7.15013	6.58717	6.75969	6.9774	7.01054	6.64505
Lmbr1	1.37916e-07	-1.25296	2.54134	2.8424	2.69859	2.80796	2.783	2.7385	6.163	6.50709	6.32986	6.79354	6.91474	6.40594
Tcaf1	1.42546e-07	-1.32125	15.2154	13.722	16.2979	15.116	13.6065	18.5962	36.6303	38.6185	39.396	39.0377	37.2965	40.2972
Lrch1	1.44131e-07	-1.5563	1.66488	1.63012	1.85421	1.73125	1.69852	2.14857	5.26902	5.00959	5.29903	4.85776	5.27567	5.8386
Tenm3	1.47024e-07	-2.7198	0.862494	0.924326	1.09895	0.869286	0.987377	0.888068	6.50147	6.19871	6.08481	5.65878	6.38398	6.26493
Man1a2	1.52497e-07	-1.57515	3.33592	3.56887	4.02356	3.57249	3.48411	4.12707	10.2661	11.6621	11.0212	10.8854	10.5382	11.5136
Sema5a	1.6041e-07	-1.94542	1.27949	1.83862	1.79979	1.69799	1.81	1.84981	6.64384	6.89756	6.69108	6.27151	6.55029	6.52246
Scaf11	1.63418e-07	-1.23256	3.1924	2.99218	3.27875	3.4097	2.76507	3.28401	7.2207	7.40392	7.60974	7.92518	6.62632	7.67796
Jmy	1.65444e-07	-1.34094	2.49477	2.64908	2.72035	2.72202	2.88777	2.84405	6.93997	6.52581	6.97942	7.14678	7.0038	6.74052
Akap6	1.67219e-07	-2.01308	2.98854	3.5769	4.16704	3.57151	2.79055	3.32993	12.817	14.3022	13.8587	13.5558	13.2619	14.6463
Sc5d	1.79935e-07	-1.24951	7.63295	8.51498	8.94699	8.32548	9.08999	8.49538	19.2843	20.5265	19.5525	20.3184	20.3916	21.1987
Ptprm	1.82364e-07	-1.35783	3.50308	4.53197	3.78994	3.70813	3.90579	4.07133	9.81184	10.2482	10.5433	9.65943	10.068	9.92565
Lrrc8d	1.83025e-07	-1.55385	1.33813	1.3093	1.42084	1.1737	1.60267	1.1977	3.91097	3.74221	3.88363	4.04789	4.25546	3.77203
Tbl1x	1.83593e-07	-1.49448	6.03232	5.42943	5.77478	5.83284	6.66397	6.94982	16.1385	16.1698	16.9036	17.5143	18.6846	17.9484
Spag9	1.84691e-07	-1.77905	8.50201	8.67174	9.05617	8.69627	7.68777	10.2849	28.0941	31.6957	30.7253	29.7229	28.2663	33.0446
Uhmk1	1.84946e-07	-1.52388	16.4693	18.4249	18.9919	16.074	18.259	18.1206	49.2689	51.236	48.6542	50.2357	52.7862	53.6128
Lancl3	1.87598e-07	-4.0776	0.279019	0.023956	0.071091	0.055701	0.0843	0.256731	2.18411	2.24097	2.17656	2.11628	1.97073	2.32563
Prkar1a	1.8773e-07	-1.45767	74.0372	89.7177	87.3887	79.4905	84.6052	84.6916	224.303	222.267	225.831	233.882	238.835	228.018
Rab11fip2	1.89156e-07	-1.26503	2.24213	2.8096	3.09242	2.35859	2.47612	2.9759	5.90439	6.87402	6.52386	5.95129	6.18713	6.90384
Ncoa1	1.8997e-07	-1.83198	3.20386	2.74195	3.225	3.17831	3.22266	3.24463	12.0174	10.5055	10.7002	10.8377	11.3748	11.5556
Dusp6	1.94061e-07	-1.81446	1.93893	2.31366	2.34021	1.42502	1.72704	2.98878	7.04524	7.82619	7.22947	7.17353	7.33226	8.18111
Abi2	1.95877e-07	-1.31108	6.64487	8.13213	8.91733	9.36272	7.08382	8.1954	18.0007	19.6686	20.1687	21.088	19.9183	21.0908
Tm9sf3	2.00386e-07	-1.38485	8.36927	9.41353	10.5642	10.2753	8.97516	9.37789	23.6721	26.4498	26.1708	25.0835	23.549	23.863
Reep1	2.01724e-07	-1.72121	11.8698	13.6561	15.1123	12.4981	14.2754	13.3609	45.9043	43.8559	44.9871	44.7223	44.9145	41.9338
Prps1l3	2.03178e-07	-1.5032	2.78898	2.8066	1.98758	2.1243	3.51504	2.82993	7.17438	8.05017	7.14685	7.10911	8.30055	7.72299
Supt16	2.06673e-07	-2.67851	1.40763	2.00398	1.70836	2.19834	2.08538	1.90246	10.4773	11.9329	11.9287	12.6155	12.5823	12.8445
Nckap1	2.06856e-07	-1.29809	27.9544	30.8203	30.958	28.9523	29.3189	30.2289	68.9387	79.4839	73.3775	72.2924	71.4321	72.755
Zdhhc24	2.10864e-07	-1.30278	3.23582	4.06972	4.26738	4.25723	4.21214	4.05833	9.07606	10.1846	10.3704	10.5703	9.92206	9.33374
Alkbh8	2.1451e-07	-1.83336	1.44049	1.30131	1.31359	1.27019	1.17026	1.37586	4.43529	4.89695	4.63758	4.6369	4.52173	4.92365
Gtf3c4	2.15835e-07	-1.34431	3.29701	3.67916	3.46512	3.50297	3.91393	3.58438	9.06665	8.68268	8.75184	9.28255	9.76777	8.89324
Klhl29	2.1798e-07	-1.57027	2.51229	2.46162	2.49279	2.40425	2.98208	3.31477	8.19942	7.90104	7.17643	7.75113	8.39727	8.58652
Ugcg	2.20399e-07	-1.54815	4.09009	5.35646	6.05784	4.74272	4.58069	5.87021	14.3102	15.6421	16.3093	14.9804	13.5704	14.9616
Selenoi	2.22284e-07	-1.63193	3.04133	3.33222	3.93691	3.62167	4.00977	3.40737	11.2522	10.8005	10.7234	11.2496	11.1931	10.9484
Zdhhc21	2.25517e-07	-1.76643	1.41869	1.6823	1.50224	1.44399	1.35883	1.45226	4.58818	5.17637	5.22341	5.22583	4.80339	5.11975
Ppp2r5e	2.25776e-07	-1.72323	6.42766	6.13645	7.31018	7.11266	6.89992	7.46328	22.5687	22.5293	21.1369	23.6594	23.0441	23.5892
Wac	2.27584e-07	-1.35502	7.423	7.11133	7.55424	7.29685	7.70473	8.08198	17.9155	18.6472	19.145	19.4672	19.5587	20.8174
Appbp2	2.33225e-07	-1.49493	6.71316	6.61355	7.33761	7.67585	7.00284	7.37599	18.2561	19.9991	20.7884	20.3258	19.7564	21.2783
Slc2a13	2.37871e-07	-1.84902	3.16519	3.51857	4.78435	3.97701	3.37888	4.32871	13.5038	14.6917	14.4566	13.2977	13.1654	14.2937
Plpp3	2.42963e-07	-2.11176	17.5964	20.0913	24.2187	20.2228	20.522	22.5723	91.7367	95.0872	93.6309	87.3244	87.4572	86.0033
Tcf20	2.48495e-07	-1.88501	3.21644	2.76665	3.87699	3.13096	3.232	3.77495	12.605	12.5265	11.9321	12.0523	11.9502	12.7974
Lrp11	2.53073e-07	-1.5653	13.292	14.6344	17.148	16.0248	17.2441	14.7779	47.1533	45.2257	46.9855	47.1086	45.7443	43.3642
Sfmbt1	2.57271e-07	-1.4426	1.878	1.788	1.94758	1.60774	2.1563	1.88914	4.92923	5.04631	5.00392	5.22614	5.39643	5.02216
Pdpk1	2.57597e-07	-1.53954	5.15896	5.59656	6.51073	5.54143	6.38832	6.35924	17.1559	16.9385	16.4588	16.6897	18.303	17.8136
Tmed7	2.59267e-07	-2.68109	5.5518	5.39251	6.41935	4.3297	4.62544	4.19451	32.5087	30.5436	33.1157	34.8079	33.1113	31.6064
Scarb2	2.60872e-07	-1.30647	15.8386	18.3401	18.9565	17.8479	17.4405	17.7454	42.7933	43.7954	42.1061	44.7322	45.5732	43.5943
Spin1	2.62825e-07	-1.24068	17.8482	20.6605	21.042	19.6983	20.0406	19.4563	45.3043	45.8557	46.011	46.206	48.2235	49.008
Rspry1	2.63471e-07	-1.40129	2.06158	2.37966	2.12136	2.13395	2.30588	2.0242	5.30698	5.83553	5.87459	5.89449	5.68115	5.81552
Kif21a	2.63501e-07	-1.38046	13.4512	13.5854	16.2843	14.0365	13.8331	17.2631	36.8746	39.5462	38.5061	38.7091	35.5862	41.0676
Pde4b	2.66946e-07	-1.47823	3.36146	3.46656	3.90865	3.62014	4.26767	3.8022	10.6764	10.3755	10.2375	10.0821	10.4055	10.7051
Nrg3	2.67264e-07	-1.8954	1.26771	1.91411	1.98052	1.3221	1.67072	1.20667	5.80756	6.10975	6.15806	5.54764	5.45729	5.74794
Dpp8	2.725e-07	-1.63888	3.50072	3.49582	3.92861	3.63427	3.76111	4.15442	11.3982	11.7211	11.1672	10.9863	12.0384	12.6811
Gsk3b	2.74533e-07	-1.77275	5.87885	7.08341	8.051	7.3486	7.16789	7.35473	24.2008	24.2802	23.4276	23.9126	25.3179	25.3988
Rad23b	2.76075e-07	-1.1904	12.7287	16.2376	15.8378	13.9854	15.3423	14.8979	33.24	33.9383	33.6226	34.3001	34.8933	33.1858
Kpna1	2.78313e-07	-1.61103	5.73734	6.87087	7.15519	6.38107	6.69667	6.72565	19.2079	21.4907	19.5877	20.951	19.4657	20.1613
E2f3	2.7955e-07	-2.01101	0.863297	1.19249	1.2101	1.04586	0.721481	1.13406	4.14047	4.3849	4.44808	4.17653	3.86714	3.84097
Elmsan1	2.80128e-07	-1.96859	1.11193	0.900618	0.629065	0.853415	1.18305	1.05347	3.89658	3.35113	3.38837	3.69665	4.03408	4.06569
Tnks	2.85931e-07	-1.96855	3.54902	3.22671	3.8969	3.37937	3.95947	4.43112	14.0465	13.819	14.5659	14.7567	14.0835	16.5629
Tspan31	2.8627e-07	-1.4314	12.384	11.3967	12.3823	9.98233	13.1182	10.6941	31.4671	32.3112	30.884	30.6618	31.3833	31.975
Ube2j1	2.89783e-07	-1.03053	18.2383	17.0273	21.0344	19.6162	21.4298	21.5169	39.4282	40.1429	40.383	39.9642	41.9154	40.9769
Sms	2.9553e-07	-1.04832	13.163	15.8079	16.4521	14.6857	13.9122	15.4911	28.7705	33.087	31.0195	31.8114	29.1099	31.3231
Akap11	2.9601e-07	-1.5132	6.2978	7.21589	8.61702	7.83526	7.08778	7.60852	19.6997	21.7684	21.1837	21.4396	20.5888	22.8045
Enah	2.98743e-07	-1.27263	7.4242	7.96081	7.96724	7.13245	8.64111	8.27323	18.9654	18.5657	18.2801	18.9199	19.323	20.4627
Kif5c	3.08633e-07	-1.89842	19.6906	21.2433	24.0982	20.833	20.9263	24.1156	82.0199	86.9239	82.1055	80.43	75.0659	81.4833
Opcml	3.11194e-07	-2.06009	2.21161	2.48699	3.6046	2.61552	2.49979	3.01028	10.3799	12.3202	12.0131	11.0881	11.2046	11.504
St8sia3	3.15508e-07	-1.2485	4.10025	5.5488	5.03444	5.8009	4.73134	5.75773	11.3497	12.5569	11.609	12.3986	12.5775	13.0992
Camk2g	3.15809e-07	-1.265	22.0105	24.3027	27.8675	27.1256	26.8632	26.6242	62.754	58.4848	61.9229	62.5565	63.778	62.5139
Arcn1	3.22981e-07	-1.0236	14.1339	17.5665	15.8278	16.0285	16.3527	16.3338	29.7206	33.1156	32.9094	34.0613	33.9459	31.9077
Slc36a4	3.26818e-07	-1.47832	4.03015	5.48447	5.38998	5.74219	5.36174	5.47553	13.7287	13.9426	14.3833	15.0038	15.7168	14.9468
Klhdc2	3.3085e-07	-1.53092	29.4726	32.7611	35.0153	27.776	35.4101	35.892	95.7665	94.2985	92.2725	94.7807	97.2812	92.9272
Med13	3.39131e-07	-1.97773	1.26825	1.20349	1.536	1.49065	1.08049	1.60662	4.83552	5.27381	5.56736	5.40446	5.1249	6.03439
Mtmr7	3.44281e-07	-1.39032	4.0507	5.68663	5.08543	5.18816	4.98336	5.91007	13.2748	13.9167	13.005	13.3633	13.8441	13.6075
Mia3	3.44556e-07	-1.16506	6.15092	7.06778	7.43312	7.61365	7.15671	6.76268	14.4798	15.1188	15.7463	16.5123	16.3532	16.3861
Entpd4b	3.45095e-07	-3.02471	1.10659	1.72102	1.14227	1.29257	1.18803	1.06357	10.6848	10.1578	9.1772	10.2089	10.7833	10.1387
Cdk13	3.45638e-07	-1.44207	1.77758	1.43268	1.83618	1.96378	1.90045	2.02028	4.8087	4.66366	4.74471	5.17087	4.82011	5.4924
Rnf219	3.45643e-07	-1.5556	0.818156	1.35732	1.17731	1.03017	1.1175	1.21824	3.0434	3.34923	3.25003	3.27001	3.5291	3.3082
Tbrg1	3.52817e-07	-1.2187	8.50476	8.68727	9.90904	7.29132	12.9533	8.69335	21.7849	20.797	21.6163	20.9206	24.4367	20.8679
Atp6v1a	3.58959e-07	-1.63522	27.1895	32.4658	39.1442	32.5059	33.1648	33.5731	99.4682	109.323	106.249	103.884	96.8101	99.4561
Lpgat1	3.59262e-07	-2.122	5.55292	7.10903	8.33368	6.18889	6.82792	6.36518	28.8422	31.1572	29.7065	28.5666	26.9819	30.5078
Dclk1	3.59847e-07	-1.78009	6.04214	7.59686	8.91418	8.26043	7.14867	8.66529	26.7701	28.0173	27.2872	25.9771	24.9057	27.1834
Armcx2	3.60896e-07	-1.45094	8.13989	9.88434	9.68209	9.92386	10.0068	9.3502	25.3352	25.1922	25.9006	26.253	25.4076	27.7065
Arfgef1	3.61113e-07	-1.56957	3.60733	4.05859	4.23124	4.38355	3.55176	4.23138	11.1639	11.8535	12.076	11.6428	11.5706	13.1185
Tle4	3.68807e-07	-1.64071	4.21993	3.99844	3.72378	4.27225	4.9822	4.6478	13.2773	13.5873	12.0546	12.6479	14.6699	14.3508
Impad1	3.70121e-07	-1.42137	9.67408	10.214	11.0897	10.2521	8.78417	9.7026	24.38	27.9414	27.0601	27.2398	26.5524	26.7709
Ppp1r9a	3.70623e-07	-1.47432	3.78372	4.87562	5.00149	4.90284	4.65664	5.00553	12.4414	13.2861	12.9239	12.7216	12.6676	14.3857
Inpp5f	3.79022e-07	-1.25125	12.3229	13.12	13.8099	14.7241	13.4643	14.8025	29.0913	33.9402	33.0711	33.5653	32.9371	33.1737
Gclc	3.79145e-07	-1.27696	6.18912	6.44804	6.91925	6.60581	6.14847	7.61534	14.7885	16.6466	16.2449	16.2441	16.3518	16.4758
Tmed10	3.81626e-07	-1.11176	29.2694	31.7853	33.4442	29.49	34.5414	31.1771	69.7761	66.5198	69.1833	68.5695	68.2633	67.663
Ikbkg	3.83443e-07	-1.23056	2.54192	2.11	2.48893	2.65719	2.90439	2.59677	5.68361	5.91199	5.73555	6.16068	6.22579	6.18315
Kif3b	3.8448e-07	-1.8095	3.26435	3.20885	3.07561	2.96196	3.68831	3.06039	11.807	11.6064	10.184	11.5208	11.4215	10.9686
Trim33	3.87576e-07	-1.50939	1.76922	2.23949	2.52036	2.37145	1.93016	2.80323	5.96736	6.42586	7.2024	6.69889	5.75922	6.76062
Ahcyl2	3.87898e-07	-1.55729	9.13581	9.50073	9.98303	7.66143	8.20706	9.14825	26.5645	27.3714	24.9431	25.1123	26.4795	27.3815
Golph3	3.89474e-07	-1.0834	14.1188	13.227	14.4471	14.3845	13.551	14.5717	29.0266	30.7204	29.4946	29.777	30.2708	29.3447
Fam168a	3.89937e-07	-1.39407	13.7057	14.0796	15.8401	13.2758	13.4878	14.1298	38.958	38.4037	36.9666	34.9275	35.4369	37.4381
Nudt21	3.90308e-07	-1.09352	6.68337	6.45812	8.49956	7.98694	7.36617	6.99876	14.9975	15.1647	15.9087	16.1446	15.5003	16.1628
Mta3	3.90614e-07	-2.0846	4.1452	3.71125	4.06485	4.0515	4.91435	5.03163	19.4711	17.0051	16.9064	17.6934	20.0146	18.8462
B230219D22Rik	3.91449e-07	-1.50493	7.78908	8.53069	8.45749	8.16347	6.33494	8.98071	20.9203	24.7548	23.9608	22.5116	20.9584	23.8508
Xxylt1	3.96403e-07	-1.96401	2.67184	3.08517	3.30414	2.79348	2.93479	1.83876	10.8333	10.8679	10.7428	10.5858	10.8981	10.9462
Paqr9	4.00802e-07	-1.61718	1.64735	1.53123	2.08894	1.94116	2.76106	1.7495	5.87285	5.82537	5.94912	6.15679	6.29887	5.84872
Hspa9	4.01833e-07	-1.14575	32.4624	40.0975	39.2587	39.5576	41.4848	38.8609	84.305	89.8672	85.3756	85.6777	85.364	82.1193
Flywch1	4.04719e-07	-1.96887	26.6034	28.2108	26.3099	25.6385	36.8409	24.7407	118.211	103.48	106.747	110.398	113.901	106.268
Cntn1	4.0855e-07	-1.75679	17.7135	19.0585	21.1231	18.7202	16.5122	19.0761	59.1549	68.7489	67.0401	63.5311	57.4609	63.251
Tomm20	4.10076e-07	-1.00148	36.02	42.0657	40.268	38.801	46.1059	39.4414	77.6707	80.8726	80.7678	84.4568	85.3953	76.7403
9930021J03Rik	4.10476e-07	-1.71947	1.4591	1.62536	2.09152	2.03573	1.98189	2.34414	6.13309	6.43662	6.08978	6.15766	6.3101	6.86834
Zbtb5	4.13713e-07	-1.06137	1.32703	1.62922	1.55219	1.43952	2.12947	1.87315	3.3529	3.37945	3.22368	3.1414	3.99805	3.67055
Mcc	4.19546e-07	-1.5388	1.55483	1.10409	1.0174	1.09284	1.20702	1.23065	3.55774	3.57485	3.28901	3.34083	3.51855	3.65864
Wdr7	4.27095e-07	-1.42551	7.82252	9.02588	8.64416	8.07638	8.42505	8.83593	22.8454	22.1006	21.5622	22.7905	23.8085	23.4269
Rybp	4.31804e-07	-1.34277	3.54776	4.07101	4.50204	4.4338	4.21314	4.33898	9.84056	10.5356	10.421	11.0356	11.4462	10.4011
Mfhas1	4.33139e-07	-1.89674	2.37667	1.95473	2.24079	2.08654	2.43977	2.58282	9.15583	7.39382	8.39151	8.43877	8.52412	9.04111
Abl2	4.37436e-07	-1.58474	1.57488	1.75838	1.79085	1.73616	1.98362	1.72186	5.28344	4.77975	5.50779	5.27935	5.572	5.27011
Fam20b	4.38264e-07	-2.09847	5.47342	6.91376	6.24171	5.41095	7.26598	6.66967	25.8243	28.3592	25.3655	26.9761	30.2604	25.846
Sec23a	4.5097e-07	-1.27405	9.52952	10.6023	11.0654	11.4312	10.3011	11.8175	24.2886	27.3731	26.0136	25.8207	26.9721	26.1151
Irs2	4.52031e-07	-2.00878	3.74638	3.66493	4.65125	3.71212	5.5056	4.27259	18.0165	16.4503	16.1367	16.1282	18.3524	17.751
Limch1	4.59172e-07	-1.25601	5.11957	4.98864	5.07843	5.22698	4.34616	4.99096	12.0717	12.2066	11.3877	11.5166	11.3073	12.5652
Pfkfb3	4.59736e-07	-2.07901	2.15415	2.0088	2.20193	1.79552	2.31917	2.05782	9.44862	8.49319	8.20448	8.75656	8.81824	9.2516
Lrp12	4.652e-07	-1.65186	3.06581	4.19047	4.22667	3.89253	4.29789	3.68357	12.4284	12.3035	11.7912	12.2644	12.9205	11.6886
Slc33a1	4.6587e-07	-1.21252	4.81605	5.33994	5.3255	5.71543	3.84441	5.18328	10.6784	12.34	12.3086	11.9395	10.8971	11.8796
Clip4	4.66321e-07	-1.62311	2.02694	2.8764	2.72539	3.50562	2.92985	2.40672	8.28029	8.85741	7.94944	8.71319	8.81495	8.12154
Camk2d	4.67103e-07	-1.36099	4.56611	5.71655	6.26973	5.26013	4.90228	5.83539	14.0275	14.8012	14.2704	13.5419	12.7787	14.1892
Cpeb2	4.67918e-07	-1.87304	3.63397	3.59095	3.83514	4.09582	3.8681	3.78296	12.8706	13.3078	14.0471	14.5074	13.6303	15.1793
Vldlr	4.68136e-07	-1.52227	3.08683	2.84798	3.33436	3.23204	2.83384	3.10778	8.34841	9.25992	8.7794	8.78863	8.63574	9.16374
Magi3	4.71142e-07	-1.72076	2.16526	2.85417	2.5878	2.48379	2.10475	2.96359	8.16569	8.48052	8.08374	7.9998	7.68168	9.55532
Scaf8	4.71678e-07	-1.90492	2.9791	2.64239	2.62236	2.38629	2.67057	2.83836	10.2079	9.50757	9.37038	10.106	10.2159	11.0313
Cdk14	4.71815e-07	-2.04053	5.14569	5.48316	6.62696	5.46398	5.62428	6.25994	24.4903	24.9343	24.9286	22.8501	21.6561	23.5005
Hnrnpul2	4.72545e-07	-1.19888	22.3228	22.6005	24.753	23.8808	25.4066	25.2808	56.8246	55.6066	56.2211	53.8834	54.9939	53.6
Cops3	4.74822e-07	-1.98033	2.59488	3.75902	3.8104	2.77092	4.0469	3.35688	12.4359	14.5494	13.4458	13.6939	13.7899	12.3396
Cadps	4.78304e-07	-1.6568	7.5384	8.7881	10.2627	7.98205	9.17568	10.1681	28.789	29.6893	28.5235	27.3645	27.0123	28.624
Ppp1r15b	4.83826e-07	-1.27235	5.9867	5.76381	5.78943	7.23402	7.35258	6.90511	15.9931	14.5813	15.2697	15.439	16.2654	16.7341
Fbxo45	4.86602e-07	-1.05871	6.68692	6.52288	6.7751	6.35111	6.14018	7.14837	14.6609	13.7446	14.2276	13.1635	13.1602	13.5839
Ttc3	4.87489e-07	-1.47052	28.6053	31.1121	33.2419	30.3404	33.061	32.1729	81.0006	89.7684	84.3731	88.4695	85.5733	93.2823
Ccdc6	4.87609e-07	-1.30547	5.07131	3.71842	4.42936	5.3824	6.35004	4.86428	12.5201	10.1043	11.5054	13.2858	14.1097	12.1688
Cbfa2t2	4.90526e-07	-1.58048	2.13522	2.32152	2.09218	2.07985	2.362	2.21688	6.84427	6.35123	6.24843	6.36563	6.61622	7.07416
Rnf139	4.90909e-07	-2.05654	1.58678	1.49914	1.54985	1.28388	1.79204	1.35302	6.3642	5.97505	6.44178	6.51395	6.04964	6.36353
Lemd3	4.97657e-07	-1.8814	1.9492	2.47046	3.00748	2.74032	2.74824	2.38417	9.09097	8.46178	9.57337	9.64508	9.74709	9.85153
Kctd12	4.98303e-07	-1.26699	4.48865	5.46506	5.02747	6.42435	4.67962	5.59562	11.1303	13.4979	12.1739	13.5428	12.2797	13.618
Ash1l	4.98823e-07	-2.38168	1.72718	1.55302	2.10141	2.19142	1.47481	1.90554	9.54652	9.09296	9.18295	9.47389	9.15288	10.6337
Mindy2	5.0467e-07	-1.56837	3.24321	3.91098	3.9473	4.20473	3.2885	3.85926	10.4252	11.9384	11.3312	11.1352	9.94241	11.8193
G3bp2	5.07661e-07	-1.25115	25.3163	32.8721	31.955	28.852	30.2301	29.4143	66.5968	73.4908	68.3943	68.5974	73.0734	75.0658
Riox2	5.09792e-07	-2.04824	0.189656	0.512922	0.458078	0.356418	0.42185	0.448397	1.39321	1.83962	1.64713	1.49806	1.81397	1.68202
Fbxw11	5.14378e-07	-1.48444	12.765	13.1508	14.2651	12.7804	16.836	13.7714	40.1581	37.8459	36.4375	38.3453	40.7246	40.3217
Smap1	5.1488e-07	-2.51506	3.29399	3.28828	3.33123	2.82817	4.46719	4.73271	22.8153	19.3545	21.1121	20.123	21.1659	20.852
Kpnb1	5.19492e-07	-1.21784	14.2702	16.3339	16.6419	15.6422	16.1308	14.676	35.2647	35.7568	35.1552	36.2388	38.8028	36.7143
Mapk1	5.23295e-07	-1.37505	18.1813	23.3098	25.9682	22.6845	23.818	23.5997	58.6114	58.5718	58.08	59.8231	61.5133	60.2037
Shroom2	5.33292e-07	-1.14868	4.59733	3.93562	4.66855	4.08042	4.57511	4.7184	9.99341	9.98066	9.53004	9.5055	9.64711	10.264
Smarca2	5.34256e-07	-1.01019	11.6448	12.7418	13.705	12.696	12.1206	14.0747	24.9031	26.9742	25.0206	25.3802	25.7095	27.069
Lgr4	5.4335e-07	-1.54239	1.69234	1.71528	2.08297	1.81288	1.6116	2.2787	5.23818	5.1606	5.2885	5.27379	5.58735	6.05643
Usp14	5.43853e-07	-1.25561	16.3778	18.9189	19.5194	18.0924	19.726	19.6011	39.1837	46.2115	44.0455	46.1665	45.6898	46.6848
Yipf6	5.46202e-07	-1.59213	2.68918	2.51785	2.66202	2.56132	2.24002	2.72894	7.20455	8.01547	8.06092	7.44484	7.72529	7.97705
Chp1	5.58937e-07	-1.11981	24.5183	27.233	25.4721	23.4873	26.1611	26.699	56.505	53.14	54.2233	54.5835	57.4065	57.8794
Smad2	5.59882e-07	-1.56895	1.60985	2.22994	1.72524	2.21957	2.43365	2.12491	5.94865	5.7887	5.65026	6.38484	6.34609	6.50236
Dag1	5.61677e-07	-1.29713	8.30298	7.73105	7.3089	8.75329	8.87903	7.80737	21.3161	18.5827	18.1262	20.4676	20.9238	20.4615
Fgf13	5.66151e-07	-1.60182	8.17419	8.94982	9.37927	7.81622	8.78089	8.32726	26.0944	27.1916	27.7508	25.7077	23.573	25.7791
Soga3	5.68001e-07	-2.17363	2.88336	3.36665	3.21584	4.01774	3.21646	3.70136	15.7726	15.58	13.8859	14.9406	15.6161	16.2472
Herc3	5.70918e-07	-1.68405	3.75061	4.6093	5.18675	4.01198	5.00119	5.04877	14.4663	15.0149	14.2804	14.3611	14.4059	16.1855
Gm42372	5.73465e-07	-1.42916	8.99611	11.163	11.9351	9.62658	10.7277	11.9338	29.256	30.4072	28.3669	27.27	27.9281	30.1459
Wwc2	5.77698e-07	-1.17801	2.59754	1.74738	2.25258	1.98336	2.53868	2.43677	5.09237	4.64956	5.1907	5.1162	5.25449	5.36968
Gprin2	5.78562e-07	-1.84327	0.450479	0.524912	0.519829	0.595187	0.66893	0.546637	1.97068	1.75085	1.96138	1.98502	2.18891	2.00577
Wdr47	5.7937e-07	-1.03534	13.5002	14.6346	15.9553	14.9873	16.6993	14.5603	29.6955	32.0718	31.0699	30.366	30.7182	31.2332
Ppp6r2	5.87952e-07	-1.50953	4.11651	4.65114	5.43181	4.1052	5.95703	4.69628	13.8545	13.0907	13.2807	13.0521	14.9943	14.1761
Rab8b	5.93351e-07	-1.60068	3.5191	3.76759	4.21594	2.87918	3.48483	3.51753	10.2784	11.0916	10.7725	10.8927	11.2207	10.5993
Epb41l3	5.93656e-07	-1.51913	12.7283	13.0261	15.2151	14.2349	12.42	14.8581	39.3563	41.7451	41.5026	37.2602	36.9994	39.5461
Kpna4	5.95081e-07	-1.27898	4.07284	3.6005	4.34334	4.28928	4.39923	4.30425	9.40225	9.35937	10.3265	10.7306	10.0577	10.8135
Rab14	5.96082e-07	-1.23942	26.6538	29.8776	33.2265	28.9375	28.427	30.3061	68.9179	74.292	69.489	67.8872	66.0717	72.2568
Nrxn3	5.96477e-07	-1.1592	6.59585	7.66318	7.85577	7.64676	6.13326	7.21552	15.9023	17.3442	16.5624	16.4875	13.7896	16.1942
Elmod1	5.97827e-07	-1.10289	22.5202	27.5782	29.963	26.0324	26.5457	28.6992	56.219	60.7519	57.883	57.8698	56.403	57.4049
Dcun1d4	6.06621e-07	-1.75366	6.51322	6.73615	6.60224	6.87177	6.97919	6.68599	20.6436	22.6517	21.5984	23.403	23.6303	24.2686
Slc1a2	6.08191e-07	-1.91377	20.8005	23.9883	27.8486	23.8609	26.7301	26.066	92.066	99.9128	99.2332	87.7638	88.0593	95.4934
Synj1	6.09298e-07	-1.6305	12.4234	15.4093	15.5565	15.5023	14.9131	14.551	45.8679	44.5819	45.1668	44.2199	44.8144	48.9161
Pja1	6.17779e-07	-1.28377	34.9316	41.0103	42.7733	37.9692	44.0568	42.6295	99.2251	95.3625	95.5605	100.367	103.111	98.9205
Fam8a1	6.26813e-07	-1.39549	15.3843	17.3655	17.2679	17.414	15.73	15.0803	40.0219	42.459	43.4199	44.1151	42.8424	45.5953
Ptprn2	6.31707e-07	-3.27567	4.22227	4.4762	4.93788	4.53572	5.76023	4.5125	50.9729	43.2112	42.9975	43.9941	48.4921	45.8038
Etv3	6.33057e-07	-1.77927	1.44986	1.51785	1.62747	1.59873	1.70816	1.80741	5.48656	4.87856	5.74767	5.75397	5.84095	5.62036
Polr2b	6.37495e-07	-1.73812	4.75412	5.4328	5.66347	5.49	6.71393	6.3985	17.5379	18.4946	18.4134	20.3724	21.3159	18.8004
Pcyt1a	6.38206e-07	-1.57197	3.54046	3.11486	3.0794	2.97804	4.13447	3.48552	10.5175	9.97989	10.1526	9.82158	10.8514	9.12836
Wipf2	6.42202e-07	-1.49999	5.70739	4.87302	5.70969	4.62567	6.49135	5.78422	17.2715	14.5365	14.9704	14.7011	16.8048	15.5946
Vopp1	6.42237e-07	-1.2005	2.80948	3.16649	2.93783	2.37444	2.96817	2.52999	6.68518	6.65078	6.191	6.33225	6.38298	6.33621
Tnks2	6.51592e-07	-1.37026	7.80363	6.31109	8.44476	7.56987	6.85902	8.25205	18.5657	18.0963	19.5823	19.5308	19.8765	21.3023
Arih1	6.59195e-07	-1.4302	5.12631	4.8135	5.10304	5.1304	4.71028	4.98543	12.9761	14.2836	13.4708	12.7956	13.0846	13.8813
Arhgef9	6.61245e-07	-1.93273	6.42011	7.19062	8.63393	6.94236	7.13508	8.54745	26.8871	31.2221	28.7699	26.8953	26.9148	30.6124
Rbm27	6.62006e-07	-1.63957	1.36912	1.5446	1.60909	1.91185	1.19253	1.76595	4.63633	4.70506	5.40111	4.93166	4.47074	5.12157
Sppl2a	6.6633e-07	-1.28538	3.49751	3.76596	3.75701	3.37684	2.85255	4.03318	8.59806	8.82537	9.29584	7.91045	7.65302	9.59381
Togaram1	6.79559e-07	-1.77708	2.17629	1.69698	2.50738	2.29754	1.77638	2.4308	6.82108	6.92072	7.31518	7.65907	7.29395	8.15233
Asap2	6.83659e-07	-2.15693	1.58858	1.53753	1.82038	2.04287	2.29305	1.68877	8.42959	7.6455	8.11271	7.74961	8.29238	8.69768
Tmem132c	6.83946e-07	-1.57017	1.12853	1.56876	1.29482	1.23243	0.992951	1.31019	3.78956	4.02107	3.61772	3.79816	3.64881	3.47736
Kifap3	6.84277e-07	-1.28823	23.3453	28.4912	30.4403	28.1141	30.9162	27.3017	65.6453	73.9273	68.6968	67.5206	67.2417	68.7575
Prickle2	6.85685e-07	-1.26426	5.05363	5.07694	5.81384	5.53214	5.67738	6.16162	14.0716	12.6097	13.2915	12.8574	13.2723	13.9225
Spire1	6.93256e-07	-1.12063	12.0825	11.3619	11.677	11.0625	12.3566	11.2981	25.5682	24.8602	23.9942	23.8887	27.0753	26.4715
Lonp2	6.94789e-07	-1.17495	7.01832	9.49259	8.79938	7.21734	9.58967	7.3918	17.6494	19.5868	17.8673	18.3316	19.6208	18.7285
Opa1	6.99233e-07	-1.63234	6.4079	6.93546	8.2982	6.6322	6.6755	7.75587	21.0833	23.8282	22.4637	22.4899	20.3755	22.1519
Gabrb3	7.07215e-07	-1.49445	8.76781	10.9913	12.9121	12.0702	10.9388	11.2993	27.474	33.2176	31.0804	33.1814	30.8763	32.8895
Crk	7.07865e-07	-1.58592	8.85928	8.07784	9.90389	8.73794	9.00208	10.194	25.3331	28.5676	27.2895	27.9839	27.6473	27.6124
Mib1	7.0962e-07	-1.7817	3.30151	3.20879	3.77987	3.66929	2.99722	4.12481	10.5853	12.2669	12.6448	12.101	11.5868	13.2999
Nup50	7.16068e-07	-1.07027	5.75632	6.64211	5.93053	6.51327	6.93093	5.96281	13.2941	13.0406	12.8249	13.9796	13.0902	13.0094
Gnaq	7.22317e-07	-1.8155	7.50884	7.79021	7.58242	7.72478	5.98374	8.13194	23.9749	28.0357	25.3645	26.0334	25.8327	28.1714
Gnai1	7.32255e-07	-1.20535	23.5102	26.636	24.7872	26.3334	23.6794	23.8573	53.9701	61.5317	54.2806	57.0628	56.4414	59.8449
Retreg1	7.40379e-07	-1.47019	5.25619	5.86819	7.52214	6.36959	5.69969	6.59035	16.1315	17.9307	17.7178	16.1381	17.2454	18.1964
Kif3c	7.40664e-07	-2.34724	6.37473	6.64526	7.18942	6.98991	9.5381	7.56394	41.0871	37.6663	35.1463	36.539	38.8202	36.1688
Ncbp3	7.41428e-07	-1.17285	1.06778	1.27409	0.986131	0.91623	1.24578	1.06645	2.50276	2.47029	2.28132	2.35661	2.60582	2.56517
Slc35e2	7.41844e-07	-1.3014	3.17795	2.20609	2.92505	2.41596	3.50625	2.76952	6.95024	6.61754	6.76968	6.74067	7.46416	7.35924
Sec61a1	7.42381e-07	-1.80313	4.26405	4.6185	4.70028	3.61816	6.23428	4.50992	16.4841	15.6256	14.8126	16.1261	17.5992	16.8742
App	7.44288e-07	-1.39316	61.9594	72.8573	80.316	69.1048	73.973	72.512	196.634	183.12	188.002	185.484	189.341	188.723
Gatad2b	7.47304e-07	-1.72593	2.80241	3.15719	3.25576	3.46856	3.29944	3.64945	11.0377	9.92198	10.3757	10.7216	10.9803	11.9065
Sparcl1	7.49808e-07	-1.00635	353.185	390.904	400.188	358.948	423.619	414.733	761.353	816.86	761.653	790.22	796.471	777.259
Mex3c	7.50092e-07	-1.69703	2.14365	2.63743	3.75114	2.62821	2.05296	3.78997	9.45183	8.83136	10.2084	8.9605	7.93393	9.74441
Scn2a	7.51703e-07	-2.28262	3.22795	3.45438	4.52598	4.18915	3.25304	4.20293	17.5149	19.0163	17.973	17.7179	18.2852	20.6883
Arnt2	7.54125e-07	-1.56888	12.1548	12.9503	13.256	12.1319	16.6075	13.5307	40.8193	36.7906	37.212	40.3641	42.6934	41.3325
Zfp366	7.55642e-07	-2.21802	0.280329	0.153053	0.188211	0.256561	0.263034	0.191958	1.04736	0.884964	1.04499	1.05354	1.17972	0.991978
Socs5	7.57596e-07	-1.02907	8.76591	9.30801	9.01683	9.43422	10.1666	8.83224	18.8209	20.0438	18.928	18.6536	18.6282	18.2333
Avl9	7.59288e-07	-1.74964	2.70581	2.95419	3.30552	3.33089	2.67154	3.38679	9.45387	10.1886	9.91338	10.2359	10.6695	11.2612
Pcnx4	7.60215e-07	-1.77555	3.53359	3.47078	4.22431	3.66658	3.81715	3.9521	11.9916	13.8044	13.1081	12.2638	13.6245	12.8039
Aldh5a1	7.64736e-07	-1.32281	10.5932	12.6091	11.703	10.1932	12.612	10.8132	29.5835	27.7592	27.7941	27.939	29.4704	28.8677
Abcd3	7.78457e-07	-1.02701	10.4507	11.8347	12.379	10.8838	11.6523	10.9432	21.6374	23.6389	22.6942	22.6638	24.4582	23.7701
Entpd4	7.78938e-07	-3.15967	1.13074	1.45062	0.84617	1.26713	0.901374	1.23611	10.6367	10.1182	9.55175	10.0335	11.2059	9.50759
Sntg1	7.85137e-07	-2.41167	0.281328	0.33143	0.47895	0.425523	0.253543	0.446355	1.77466	2.14607	1.96177	1.92657	1.91726	2.0708
Ppt1	7.9025e-07	-1.00084	13.1854	15.9748	14.8741	13.8639	17.7388	15.6219	28.9091	30.1351	31.4809	30.4985	32.0629	29.5383
Psmd1	7.92542e-07	-1.42407	13.453	15.5938	16.5748	15.1457	17.4219	17.3665	39.752	41.7326	40.5586	45.4739	45.7059	43.1938
Zfp397	7.96067e-07	-1.8703	1.22642	1.42318	1.92927	1.57252	1.21869	1.77826	4.75267	5.79503	6.25644	5.68446	4.99283	5.96555
Rmnd5a	7.96175e-07	-1.39215	7.76024	6.7321	7.71096	7.93437	6.92688	9.14671	20.3823	20.9335	20.8416	19.6269	18.8653	20.6411
Mtx3	8.00189e-07	-1.67215	2.3541	3.09893	3.71617	3.36899	3.74034	2.83534	9.71364	9.56633	10.2831	10.2918	10.3019	10.757
Zwint	8.02342e-07	-1.57673	103.728	120.526	125.549	108.487	143.772	123.381	342.153	352.774	352.925	387.385	379.086	349.615
Rnf103	8.0432e-07	-1.11523	7.53676	8.46164	8.37031	8.43533	7.96975	7.84622	16.479	16.9992	18.9965	18.4196	17.6145	16.8168
Dtna	8.08336e-07	-1.37751	4.28473	4.6066	4.74304	4.17026	4.13954	4.57056	10.924	11.0515	11.3238	11.4765	11.7351	12.3798
Zfp319	8.12716e-07	-1.4203	1.95209	1.7699	2.13145	1.96769	2.69181	2.03335	5.9139	5.20361	5.43328	5.26171	6.45557	5.311
Golga3	8.13968e-07	-1.0844	3.79219	4.62235	4.03732	3.861	4.69059	3.72643	8.71657	8.97831	8.83547	8.96024	8.79548	8.15356
Ctnnb1	8.1606e-07	-1.25963	47.724	51.2221	51.1671	45.6583	52.4862	51.3986	121.638	126.855	122.427	117.618	116.013	112.93
Nus1	8.20102e-07	-1.47815	7.73178	7.67557	8.21377	8.49913	6.64841	8.51302	20.0298	23.3334	23.2067	22.1035	20.5512	22.498
Cog5	8.23589e-07	-1.89395	1.28519	1.23456	1.81904	1.37456	1.28104	1.83194	5.24357	5.57228	6.02587	5.32776	5.40951	5.22432
Arfgef2	8.24379e-07	-1.63486	2.8847	3.39315	3.84893	3.47205	3.81304	3.82893	11.0971	10.2685	10.5665	10.6626	11.5296	11.8407
Nedd4	8.27077e-07	-1.23247	24.8187	26.5339	27.2411	26.3923	23.6838	27.3503	59.5991	61.0226	58.3086	59.8447	62.8028	65.0216
Fam171b	8.27782e-07	-1.83065	8.80879	9.85122	12.5598	11.0115	11.1055	10.7515	35.1173	39.9892	37.7249	37.5336	36.6587	40.9366
Poc5	8.30726e-07	-1.60297	2.21419	2.16342	2.45071	2.74445	3.53313	2.24786	8.16807	7.21396	7.47813	7.90847	8.21421	7.65685
Epg5	8.33632e-07	-1.93473	1.0908	1.15567	1.61655	1.06844	1.49843	1.30262	4.87339	4.37855	4.95292	4.73946	5.29775	5.31978
Wdr36	8.39089e-07	-1.17933	2.77716	3.43161	3.07038	2.94622	3.02643	3.06719	6.74885	6.8839	6.67007	6.68713	7.1295	7.36794
Nol11	8.41791e-07	-1.60518	1.34185	1.53748	1.37017	1.84113	1.72222	1.58977	4.92552	4.78115	4.70056	4.92819	4.89797	4.37251
Rnf24	8.45987e-07	-2.43235	1.15388	1.10865	1.08315	1.05022	1.57338	1.41951	6.55692	5.75106	6.4974	6.94319	7.40895	6.72509
Zfp169	8.52729e-07	-3.18728	0.191894	0.232457	0.256686	0.257682	0.386813	0.403679	2.64711	2.52016	2.53428	2.29925	2.72295	3.02751
Wasl	8.68222e-07	-1.38609	9.60731	9.69915	9.65504	9.81696	10.116	8.50549	24.0202	24.2124	25.5205	24.7646	25.1492	26.3592
Stox2	8.7185e-07	-1.83236	2.72821	2.66215	2.79644	2.60502	3.10571	3.08295	10.5154	9.21843	9.60875	9.53109	10.3856	11.2116
Peli3	9.02726e-07	-1.72429	3.58659	3.07301	3.91262	2.90437	3.5398	3.94373	11.1646	10.9178	11.352	12.2167	11.7856	11.819
Nipal3	9.16326e-07	-1.36456	7.34794	8.76325	9.13243	8.66659	10.2603	8.94109	23.5905	21.9728	22.1865	22.1744	23.8493	22.9873
Dip2c	9.29982e-07	-1.58245	3.51838	3.00722	3.57332	3.61291	3.18715	3.63384	10.6521	9.51248	9.42509	10.447	10.3528	11.1017
Pcgf5	9.33209e-07	-1.61041	1.36269	1.7257	1.38307	1.5673	1.27568	1.3568	4.27462	4.56164	4.06694	4.6835	4.138	4.75186
Snrk	9.40956e-07	-1.71305	7.64079	7.96571	8.60501	7.95505	10.0827	7.94906	29.4853	26.2195	25.7386	26.3652	29.009	27.7594
Mapk6	9.42511e-07	-1.19748	6.9822	7.91102	8.82339	8.2204	7.74645	8.77885	17.4453	17.9404	19.1783	19.9096	18.8017	17.8673
Alg10b	9.44383e-07	-2.07015	1.55983	1.7784	1.96748	1.67487	1.29368	1.65854	6.07312	7.4679	7.41343	6.80821	6.55087	7.39739
Braf	9.44644e-07	-2.21963	1.66498	1.44009	2.40056	2.41742	1.70295	2.41882	8.28692	9.73715	9.61898	9.28318	8.90707	10.2683
Mbtps2	9.45366e-07	-1.38267	1.63519	1.34556	1.98846	1.69386	1.18626	1.35699	4.12361	4.03265	4.15472	3.94955	3.77725	3.96768
Grid2	9.49494e-07	-1.54673	0.769354	0.670137	0.858025	0.889872	0.738428	0.909404	2.11723	2.11862	2.539	2.46831	2.42168	2.46146
Lingo2	9.51024e-07	-1.80454	0.428218	0.766598	0.765217	0.805296	0.558799	0.685261	2.29244	2.57648	2.38222	2.45357	2.09132	2.20951
Myo5a	9.52394e-07	-1.8261	7.20278	8.82664	9.41781	8.75638	7.99125	9.91005	29.9733	33.5627	32.7874	29.2096	27.6876	31.5322
Dock3	9.54171e-07	-2.99111	1.21786	1.88928	2.50789	1.78502	2.02327	1.82647	16.2945	14.5699	14.8445	13.7474	15.4326	14.5566
Dennd5b	9.59151e-07	-1.74006	2.20425	1.9606	1.92254	2.45153	1.97568	2.20683	6.95106	6.93821	6.67775	7.11217	6.81136	8.0053
Grem2	9.69425e-07	-1.52978	3.00089	3.94269	3.84231	4.05482	2.55429	3.22091	9.19985	9.79512	10.3904	10.1259	9.86465	10.1508
Jam2	9.71109e-07	-1.53383	3.8141	3.8292	3.6821	3.99743	3.87895	3.99084	10.1353	11.8703	10.6143	11.3041	11.4281	11.803
Trim66	1.00038e-06	-1.78468	1.87399	1.89804	1.93203	1.74236	2.32903	2.0321	6.89483	6.26143	6.32383	6.34645	7.49463	7.36093
Gnl3l	1.00523e-06	-1.21803	28.8091	23.0677	34.0047	30.3336	33.5096	33.0195	68.8023	65.3914	67.6533	71.7743	76.793	74.7007
Lsm11	1.00538e-06	-1.67514	1.39794	1.47497	1.71705	1.75161	1.71775	1.57718	5.51511	4.99317	5.02159	5.21936	5.02658	4.99831
Scd2	1.00881e-06	-1.63912	141.04	159.609	156.94	143.924	195.298	144.62	525.633	472.169	466.727	476.646	507.35	483.793
Sash1	1.01686e-06	-1.64096	6.70683	6.96343	6.11088	5.83938	5.8121	5.9056	20.9726	21.0786	19.1893	16.9734	18.7448	19.4896
Epdr1	1.01828e-06	-1.37163	21.2692	23.6014	23.9152	20.7233	28.0532	20.4494	60.5755	58.2993	56.7417	59.9772	61.6095	59.9202
Pde4d	1.01842e-06	-3.04598	0.350769	0.444357	0.252027	0.288337	0.223038	0.34296	2.78014	2.46139	2.57636	2.40369	2.7695	2.71347
Nrcam	1.02134e-06	-1.72585	5.88054	7.00697	7.9561	6.14767	5.71114	7.07606	20.7949	24.4762	21.39	21.4541	20.6054	22.8572
Gtpbp8	1.02501e-06	-1.49712	1.95055	2.30933	2.55723	2.58828	3.70915	3.17253	6.97069	7.54296	7.48675	8.02101	7.88944	8.06414
Dlg2	1.02859e-06	-1.47978	5.3814	5.78142	6.66561	7.11916	6.61577	6.95217	17.6917	18.6402	16.9721	17.9026	17.4744	18.7416
Kif2a	1.03201e-06	-1.3589	4.94738	5.4691	5.48375	5.43858	4.08587	4.77212	11.6566	13.5426	13.742	12.9063	12.2173	13.3866
Mal2	1.03249e-06	-1.00314	11.2409	14.3611	13.8938	13.6522	11.9861	12.2774	22.8071	28.5551	28.2316	26.5441	24.0125	25.0099
Eif4ebp2	1.03349e-06	-1.13167	7.63261	7.79584	6.63697	7.11826	9.6236	7.53807	18.1735	16.1018	15.5798	16.1064	18.3542	17.2325
Brinp3	1.03586e-06	-1.50506	2.64654	3.61797	3.36034	3.12535	3.33728	2.75709	8.85076	9.33648	8.4467	8.57422	9.05504	9.22454
Zzz3	1.03738e-06	-1.03037	2.85976	2.89259	3.05186	3.05347	3.12496	3.27877	5.56472	6.2427	6.0689	6.22608	6.4829	6.71446
Zbtb11	1.03933e-06	-1.9141	3.36535	2.59502	3.92871	3.22479	2.94228	3.81322	11.8114	11.9005	13.3656	13.4452	10.9795	13.3811
Add3	1.04059e-06	-1.1312	9.52147	10.1184	10.0679	10.1734	8.80594	9.26892	21.4109	21.689	20.5436	20.299	21.1923	21.8125
Pdha1	1.04061e-06	-1.94799	11.3541	13.0217	15.381	12.5599	13.3997	15.3619	54.384	54.307	52.5838	51.7565	50.9103	48.8874
Fbxl4	1.0529e-06	-1.38951	1.68518	2.60175	2.685	2.33636	1.86618	2.10077	5.10313	5.85157	5.99006	5.97553	5.77651	6.08292
Atl2	1.05649e-06	-1.11561	5.93703	7.50384	7.73776	6.49131	7.46433	7.2301	14.4776	16.6105	16.0343	14.9124	14.4097	15.3536
Fem1b	1.05753e-06	-1.35205	10.4692	10.3787	11.6335	10.7116	13.1245	10.9584	28.09	26.2623	26.9431	28.8539	31.3604	30.2293
Slc23a2	1.06278e-06	-1.80891	4.66502	5.30258	6.18465	6.75261	7.25544	6.18289	22.1043	19.2038	20.5229	20.9901	23.0451	21.4717
Extl2	1.06339e-06	-1.23241	10.2196	12.1521	12.7652	10.7874	10.7294	11.6372	25.7105	29.0011	28.3894	27.4103	24.7543	25.1903
Pdgfra	1.06367e-06	-1.87224	1.79201	2.03968	2.20109	2.27976	2.13035	2.30771	8.02833	7.00059	7.36413	8.1962	8.06577	8.02517
Fam13b	1.06938e-06	-2.85897	2.35405	2.04916	1.74909	1.56181	1.72423	2.18748	13.9795	13.4389	12.5613	14.1276	14.2878	15.9502
Snap91	1.07415e-06	-1.62878	20.8976	23.7756	29.7032	24.6265	23.4666	24.2055	78.8299	77.8336	75.4881	72.1979	72.9679	76.2779
Mgat2	1.07937e-06	-1.00673	7.34542	7.73419	8.09303	9.54733	7.53297	6.54922	14.8686	16.3666	16.172	16.2167	15.6916	14.7264
Dnajc5	1.08348e-06	-1.34554	20.9144	26.7802	25.9449	24.8785	27.1209	24.9834	65.6313	61.011	64.0323	63.5794	65.5988	62.9161
Osbp	1.08349e-06	-1.19782	7.81544	7.64284	7.909	7.94984	9.79622	7.18114	19.2351	17.0517	18.6827	19.0288	18.9824	17.8031
Htr2c	1.09096e-06	-1.85078	4.18073	5.92512	5.20654	6.11157	4.31641	5.84012	18.3221	21.1559	19.6611	18.4811	16.5067	19.7829
Jade1	1.09366e-06	-1.27134	2.90068	3.20794	3.04664	3.24188	3.522	3.50003	7.31874	7.5084	7.7014	8.32748	7.55992	8.45899
Selenop	1.09695e-06	-1.67642	52.3821	49.2021	50.55	45.5336	55.6756	49.9363	147.106	173.271	162.023	160.672	169.132	157.183
Herpud2	1.10758e-06	-1.48899	5.32775	5.47274	6.12618	5.98268	6.22787	6.06558	16.4071	17.3436	16.6029	15.5255	17.3208	15.6115
Senp5	1.10879e-06	-1.49173	3.44775	3.03112	3.5996	3.58498	3.20241	3.38807	9.58747	8.83726	8.91275	9.63329	9.80874	10.18
Cacnb2	1.11815e-06	-1.74287	2.25198	2.97062	2.86414	2.58625	3.04432	2.68855	9.54438	9.07207	8.94422	8.39639	9.3622	9.59118
Fzd1	1.12672e-06	-1.78858	1.78314	2.10543	1.88071	2.00099	2.08239	2.60459	7.47117	7.09176	7.13776	7.34467	7.02124	6.97015
Zkscan1	1.12712e-06	-1.24647	2.21189	2.81668	2.71916	2.52723	2.26867	2.47109	5.70378	5.99393	5.74013	6.01124	6.15174	6.02307
Zfp521	1.12986e-06	-1.32154	1.38015	2.19865	1.77672	1.605	1.8033	1.72522	4.38392	4.51302	4.29361	4.28419	4.3329	4.40782
Cand1	1.13632e-06	-1.12129	10.836	11.6678	12.5168	10.8799	12.6061	11.3779	25.1201	23.7276	24.7451	25.3835	26.9582	26.0932
Tlk1	1.15746e-06	-1.32652	3.31723	3.22331	3.61971	3.65432	3.38832	3.4813	8.32018	9.24422	8.92365	8.85316	8.0386	8.49563
Aldh3a2	1.16293e-06	-1.22796	3.83868	4.34995	4.21429	4.72349	4.94598	4.3493	10.5271	10.5087	9.77266	10.1104	10.3975	10.5726
Tgs1	1.18669e-06	-1.25324	2.63654	2.86452	2.81421	2.48277	2.92651	2.87502	6.52632	6.45194	6.83683	6.51272	6.18989	7.05174
Car10	1.19471e-06	-1.59464	3.63543	4.95285	6.16707	4.4579	3.39739	4.42434	11.7427	14.9675	14.2823	13.8158	12.6873	14.1551
Lrrn1	1.19682e-06	-1.04649	10.0384	9.6819	11.4286	9.42167	11.6233	11.0282	23.1085	20.6451	21.9493	21.0853	22.1864	21.6108
Fam13c	1.20271e-06	-2.21188	2.74424	1.49907	3.70184	2.14909	2.38409	2.89959	11.1277	10.987	12.5748	11.6759	13.1431	11.7343
Snw1	1.20345e-06	-2.17518	6.894	6.55718	4.52947	5.42426	5.49396	5.60488	24.7845	28.1944	23.3728	24.5766	27.1139	27.791
Zfhx3	1.20428e-06	-1.83667	0.434864	0.475415	0.500181	0.503609	0.495415	0.69785	1.72741	1.89554	1.88713	1.65104	1.76507	2.17276
Ptprt	1.21689e-06	-1.8707	1.81228	2.77037	2.48615	2.10461	2.35588	2.30404	8.76496	8.59649	7.92396	8.05976	8.35606	8.88861
Nhlrc3	1.2176e-06	-1.45792	0.945634	0.889549	1.11493	1.10959	1.28799	0.800842	2.5792	2.53421	2.95626	2.941	3.01612	2.86392
Prkaa2	1.2192e-06	-2.19778	0.809475	0.721186	0.956671	0.808615	0.672078	0.752885	3.30006	3.92634	3.70522	3.74357	3.30842	3.6747
Atf6	1.22101e-06	-1.55417	1.44665	2.19134	1.67799	1.74215	1.79085	1.85543	5.10031	5.35087	5.52231	4.99363	4.92338	5.54445
Scrn3	1.22755e-06	-1.03221	2.77959	3.43582	3.2085	2.81235	2.67927	3.08525	5.4802	6.70337	6.29789	5.75358	6.06801	6.51122
Atrn	1.23634e-06	-1.79839	5.03385	4.83931	5.48016	6.32674	5.6765	5.92684	20.4721	19.5915	18.0077	18.5875	19.2771	19.8344
Arl4c	1.24192e-06	-1.29398	9.02028	11.1098	10.4892	9.44424	10.5234	10.9588	25.6293	24.0589	25.0505	25.2125	26.0715	24.8903
Klhl11	1.24647e-06	-3.37531	0.926632	0.920788	0.430242	0.750451	0.679226	0.603829	8.06697	6.58482	7.70899	7.1497	7.69081	7.53543
Thrap3	1.26278e-06	-1.16348	6.99453	7.68165	8.75572	7.71655	9.19512	8.28824	17.5519	18.2239	17.6218	17.5955	18.397	19.544
Utp18	1.26789e-06	-1.21963	2.33977	2.10298	2.2285	2.34945	2.37789	2.25309	5.2161	5.29927	5.17347	5.84357	5.13902	5.12158
Cenpc1	1.28081e-06	-1.68343	1.90248	1.82183	2.28087	2.49035	1.92831	2.29294	6.4277	6.75901	7.21994	6.86369	6.03622	7.53855
Rffl	1.29108e-06	-1.37932	1.85171	1.3532	2.00489	1.47649	2.16627	1.92492	4.42942	4.34343	4.6942	4.76801	4.90166	4.90052
Cep68	1.2958e-06	-1.35018	2.03343	1.8579	1.78661	1.85757	1.83546	1.82696	4.77506	4.47557	4.58945	4.62873	5.1499	4.92974
Stambpl1	1.29584e-06	-1.18895	4.2232	4.29655	4.15072	4.33516	5.63681	4.08725	9.61817	10.3905	10.6825	9.56422	11.3127	9.37215
Plcxd2	1.31808e-06	-2.65891	2.6892	2.02026	2.45479	1.94186	1.89953	2.76727	14.5702	16.1367	15.393	13.4677	13.179	14.2371
Ankrd17	1.31863e-06	-1.35403	4.68945	5.05324	5.19787	5.44734	5.86186	5.32557	13.3534	12.8098	12.537	13.409	13.8478	14.7576
Traf6	1.32603e-06	-1.24239	1.23385	1.0979	1.20655	1.21945	1.14249	1.04402	2.72058	2.57925	2.85529	2.61917	2.86526	2.7899
Gigyf2	1.3298e-06	-1.09104	3.09185	2.84883	2.96041	2.89546	2.8956	3.6142	6.03864	6.30149	6.24798	6.6285	6.71112	7.0698
Cnnm2	1.33214e-06	-1.4083	3.14548	3.44768	3.32137	3.09703	3.91499	3.15401	9.59977	8.67046	9.0125	8.65789	9.0649	8.29336
Larp1	1.33511e-06	-1.22995	9.06917	9.29772	9.29301	9.76436	10.9263	11.4386	24.6969	21.8757	23.3336	22.56	23.8431	23.9314
Tspyl1	1.34119e-06	-1.02184	30.8158	37.5188	35.5311	35.7115	38.3885	33.3462	72.7988	70.3052	69.146	73.5353	73.9346	69.351
Gtf3c3	1.3518e-06	-1.66393	2.00177	2.38959	2.59473	2.60519	2.02373	2.28291	6.82088	7.48813	7.71767	6.85847	7.24403	7.91021
Rapgef2	1.36407e-06	-1.67763	3.40681	4.26696	4.4079	4.14171	5.03775	4.77678	13.95	12.7944	13.881	13.5183	13.779	15.3733
Tbl1xr1	1.38907e-06	-1.02264	2.73689	3.23274	3.20221	2.97819	2.68762	3.74703	6.02366	6.20419	6.8505	6.07195	6.0318	6.57502
Gfra1	1.39101e-06	-1.95438	3.21201	3.85183	3.51716	4.03446	3.81781	4.02275	14.4493	14.7558	14.9445	14.7108	15.3007	12.8672
Sptbn1	1.39351e-06	-1.15669	28.8779	27.5581	30.1529	27.8729	27.4755	29.8675	67.6108	66.1623	61.7155	59.2803	63.4694	64.7931
Lyrm9	1.39708e-06	-1.4483	2.5396	2.65196	3.23497	2.74596	2.8556	3.00009	7.4832	7.64046	7.26924	7.76637	8.20894	8.09948
Tbc1d9	1.39909e-06	-1.65748	6.22051	7.63378	8.71126	7.62887	7.46908	8.41745	25.2992	23.1007	24.5413	23.7279	25.1535	23.5467
Cds2	1.40193e-06	-1.89449	19.7774	22.9051	23.8984	21.4921	29.3847	23.6564	95.0266	82.1923	83.159	85.0408	92.2327	86.9962
Sphkap	1.40966e-06	-2.4959	2.20762	1.81375	2.82585	2.3586	1.90442	2.66438	12.3418	13.9054	13.4964	12.1705	11.5722	14.2137
Tspan3	1.40978e-06	-1.09729	59.319	70.1568	69.6229	69.5173	72.8675	70.4697	147.64	151.363	147.042	150.703	147.048	137.587
Tada2b	1.42084e-06	-1.77434	4.00336	3.29314	3.98164	3.20349	3.97321	3.56873	13.4689	11.7301	11.6318	13.1475	13.1814	12.1791
Trps1	1.42524e-06	-1.43758	0.550942	0.901494	0.748898	0.640703	0.420984	0.663291	1.72374	2.15891	1.88271	1.61417	1.44475	1.81079
Ammecr1l	1.42542e-06	-2.86116	0.930856	0.614735	0.663382	0.691995	0.743974	0.620688	5.04406	4.88849	4.57434	5.48311	5.66834	5.33573
Rraga	1.42627e-06	-1.20196	33.8414	42.3011	44.4062	45.3593	44.2668	44.9634	89.5937	101.996	100.586	104.592	99.6528	90.5306
Pitpnb	1.43274e-06	-1.97145	5.72626	6.73826	5.20096	6.02805	4.97012	5.19589	23.9264	22.0064	19.2932	22.8102	22.4675	22.2804
Amer2	1.4411e-06	-1.39919	3.5386	2.98972	2.53644	2.92583	3.0995	3.93095	8.15634	7.69028	7.8934	8.48298	8.18171	9.7639
Slc35f3	1.4439e-06	-1.94418	1.91921	2.38151	3.185	2.33487	2.28415	2.53324	9.81283	9.14316	9.18072	9.70768	9.23696	9.24848
Pdxk	1.45332e-06	-2.94163	6.5248	7.86784	6.41248	5.98143	8.47016	6.78171	58.1702	48.3059	49.0637	54.0293	58.3137	55.0898
Gnptab	1.45333e-06	-1.53261	4.22509	5.08258	5.29716	4.91706	4.83778	4.62964	14.0707	13.6622	13.3692	13.5221	14.3814	14.863
Wdr48	1.45465e-06	-2.10585	2.11611	2.67981	2.43849	2.50825	2.72384	2.8892	11.2043	9.7048	10.5792	11.4481	11.2839	11.8785
Tbc1d30	1.4773e-06	-2.09359	2.08116	1.60556	2.54246	2.12667	2.5266	1.86098	9.81731	8.50406	8.55951	8.6716	9.37805	9.45959
Srpr	1.48303e-06	-1.19277	11.2309	15.2584	14.2359	14.6385	14.5096	13.7138	31.7054	31.1813	30.4889	32.54	33.0757	32.0815
Xpot	1.48368e-06	-1.29886	7.03737	7.89906	7.23718	7.6345	8.15884	7.46295	17.5111	17.8941	17.8488	18.9491	19.162	20.408
Mmut	1.4847e-06	-1.41015	3.94594	4.11115	4.8881	4.57922	2.52669	5.08077	10.5371	11.5757	11.628	10.4983	10.1479	12.4047
Slc6a11	1.49946e-06	-1.87994	50.7437	65.1406	59.5515	54.3396	85.7796	63.7291	248.597	219.694	220.912	231.442	251.17	224.179
Tmod2	1.50335e-06	-1.23447	17.4409	14.2319	14.7548	14.6603	14.8381	18.3231	35.1696	36.9005	37.6838	36.409	35.0079	40.5917
Lnpep	1.50976e-06	-2.10798	1.93591	2.43767	2.45237	2.52638	2.60404	2.57941	9.25927	10.1036	10.3368	10.0972	10.8834	11.9817
Atp2c1	1.51046e-06	-1.64744	6.69392	7.27209	7.47871	6.29857	6.53931	6.58994	21.264	21.724	20.6872	19.4002	21.5762	23.3928
Fam91a1	1.51294e-06	-1.5914	5.52454	5.38891	5.77567	4.84961	5.94736	4.70054	15.4058	15.0287	16.3671	16.7925	16.6524	16.7449
Ttc39b	1.51917e-06	-1.68628	1.37788	1.64775	1.70602	1.86743	1.6733	2.09054	5.65536	5.71259	5.74007	5.64589	5.10854	5.48817
Dpysl3	1.52008e-06	-1.35293	5.95632	6.42839	5.48661	5.96286	6.1211	6.71218	15.9385	14.2093	15.0248	15.8043	15.6694	17.0134
Dcp2	1.52188e-06	-1.76471	2.9362	2.97067	3.25645	3.04395	3.24268	3.31377	10.0924	11.0497	10.0959	10.3418	10.2366	11.9436
Lrrc41	1.53211e-06	-2.45175	1.47462	1.67069	2.24877	2.15117	2.76045	2.19848	12.2763	11.222	11.1649	10.9209	12.3243	10.4996
Sgpp1	1.53894e-06	-1.00262	5.62039	5.17935	5.78015	5.15188	4.98575	5.42722	10.6082	10.6678	10.4396	10.4668	10.7674	11.4566
Itch	1.55414e-06	-1.33295	4.50704	4.68913	4.80965	3.97175	4.42069	5.21148	11.4367	12.5811	11.1071	11.6525	10.8602	11.9161
Smcr8	1.55652e-06	-2.09422	1.1651	1.34385	1.19866	1.45194	1.36705	1.22959	5.87493	5.57343	4.74537	5.83644	5.79774	5.29076
Slc7a14	1.55752e-06	-1.92853	3.04561	4.07912	4.84834	3.95507	4.05826	3.93092	15.2736	14.0665	14.6263	15.3884	15.7042	15.9864
Pum2	1.55902e-06	-1.12387	10.007	10.1253	10.5505	10.6924	8.72146	11.6101	20.2282	23.3444	23.6029	23.2124	21.1241	22.9664
Asph	1.56006e-06	-1.23903	2.1191	2.55376	2.80048	2.93436	2.35338	2.52506	5.53401	6.49539	6.05226	5.95161	5.8219	6.22621
B3galt5	1.56183e-06	-1.73672	3.29346	3.58867	4.16718	4.0778	3.56055	4.08017	13.103	12.4346	12.614	13.9736	11.4882	12.2665
Fam117b	1.57788e-06	-1.20083	6.45287	7.08866	6.9401	6.76809	7.5795	6.12951	15.8399	14.2901	15.9638	16.1715	16.5316	15.3556
Zfp382	1.59065e-06	-2.4214	0.822314	0.465968	0.811404	0.763344	0.447201	0.673642	3.46511	3.87055	3.63569	3.68435	3.13258	3.5529
Jade2	1.59141e-06	-1.41625	2.56664	2.50804	2.97762	3.29379	3.45206	2.90476	8.01818	6.83672	7.49265	8.26763	8.28374	8.34864
Mgat5	1.59451e-06	-1.35564	4.39536	4.86182	4.77606	4.56519	4.89234	4.1294	12.0939	12.4458	11.1962	10.7662	12.3949	11.7857
Sobp	1.59996e-06	-2.28735	2.32421	2.37981	3.03337	2.97223	2.62462	3.03451	14.8313	11.9892	13.1778	13.1574	13.1061	13.6438
Alg9	1.60389e-06	-1.00821	2.43622	2.9147	3.8135	3.65342	3.7204	3.23896	6.21804	6.49887	6.82488	7.09647	6.80015	6.34177
Rnf214	1.61149e-06	-1.66893	4.38104	3.8412	4.28265	3.87326	5.06612	3.85826	12.6289	12.5754	12.7143	13.2739	14.9608	14.3036
Slc19a2	1.61207e-06	-1.99967	1.75702	2.03559	1.66124	1.94501	1.95496	1.96162	7.41496	6.785	7.23685	7.78636	8.36542	7.66269
Cadps2	1.61221e-06	-1.74309	3.6329	4.37145	4.49147	3.59301	4.15793	4.67111	13.17	12.9551	13.6474	14.2478	15.1872	14.2052
Cntnap2	1.61543e-06	-1.07553	5.9897	8.27908	6.71443	8.06605	8.13568	7.95728	15.7698	16.0292	14.8759	15.8695	15.9627	16.6297
Pias1	1.61908e-06	-1.57822	2.77897	3.20191	3.33378	3.56705	2.61257	2.85123	8.40673	9.05439	8.72643	9.61032	9.41315	9.56906
Lrrc4	1.62473e-06	-1.42463	3.73305	3.20615	4.87694	4.87738	3.93418	3.63175	11.1924	10.8264	11.1712	11.0068	10.2647	10.662
Gjd2	1.62889e-06	-1.3199	2.12259	2.29462	2.08207	1.68923	2.89648	1.57006	5.61981	5.04377	5.02865	5.1775	5.95171	4.77166
Srgap1	1.63546e-06	-1.18382	3.27528	2.87744	3.34563	2.65226	3.67583	3.38967	7.76292	7.0953	7.18537	6.31177	7.38916	7.91026
Syap1	1.64518e-06	-1.19911	4.04473	4.72387	6.62465	5.7703	4.21327	5.67437	10.4616	12.3132	12.8853	11.6874	10.9778	12.9676
Stam	1.64721e-06	-1.1312	4.21318	4.72141	5.10134	4.13377	4.15022	3.91087	9.12485	10.4095	9.45268	9.42216	9.60024	9.44686
Alg11	1.65017e-06	-1.54209	2.3928	2.96315	3.01971	2.84858	2.94392	3.14756	7.20642	8.7792	8.02409	8.36708	9.15112	8.89831
Fbxo11	1.67316e-06	-1.12517	12.2007	12.4997	14.1714	13.5162	11.1349	14.2237	24.8883	28.4258	29.2584	29.6412	26.215	31.1578
Pcdh10	1.67482e-06	-1.81622	2.94837	3.32928	3.32788	3.77491	3.09066	3.50977	11.7574	12.454	11.7982	11.1962	10.4964	12.6621
Zcchc2	1.68453e-06	-1.42646	1.71112	1.31118	1.44027	1.34112	1.89989	1.87342	4.53752	3.49342	4.1564	4.11078	4.78839	4.65515
Eif2s3x	1.69618e-06	-1.17781	15.567	18.2228	17.8514	16.9318	17.426	18.0793	35.6178	41.5217	39.131	41.9193	39.8199	37.4497
Epm2aip1	1.6977e-06	-1.75457	10.0054	11.5403	10.5718	11.0023	11.5806	11.3505	33.4331	36.2991	35.4751	37.1234	38.6158	41.9258
Crkl	1.70959e-06	-1.60637	5.9072	6.6589	5.17303	5.73545	6.72749	5.70055	17.4441	17.3905	16.5819	19.1865	19.4764	19.2389
Zfp106	1.71193e-06	-1.12439	11.1319	11.0887	10.8424	10.1585	10.578	12.9204	23.6511	26.4923	23.6807	23.8496	22.7993	24.9826
Dlat	1.72025e-06	-1.06327	10.6749	13.5705	14.3141	14.1848	13.474	13.0105	26.4424	27.5049	29.2311	30.1374	26.086	26.1593
Ipp	1.72035e-06	-1.3809	1.52895	1.55998	1.44129	1.73908	1.05279	1.47753	3.61747	4.27706	3.65553	4.08706	3.55406	3.72578
Ppp2r5c	1.72328e-06	-1.18295	11.5018	10.432	12.1988	11.9628	11.0579	13.119	26.0771	27.316	27.7408	25.7999	26.6326	25.9799
Ppat	1.72702e-06	-1.43065	1.15243	1.52918	2.0218	2.08315	2.00596	2.24373	4.70801	4.15752	5.24427	5.14018	5.16551	5.33469
Rcbtb1	1.72735e-06	-1.01906	6.06991	6.05198	6.86651	6.43496	8.03069	6.91011	13.0591	13.8923	13.304	13.6072	13.9396	13.9999
Isoc1	1.72773e-06	-1.05743	7.72283	9.41733	9.08097	9.00901	7.37748	9.60878	17.1797	18.1209	19.008	19.4079	17.3564	17.6007
Kmt5b	1.7553e-06	-1.19781	1.959	2.43962	2.58775	2.71952	2.43644	2.41502	5.36249	5.5297	5.56737	5.72642	5.20272	6.00464
Uqcrc2	1.76346e-06	-1.68675	26.0354	32.3755	35.3448	26.523	34.582	33.036	102.834	106.232	98.8947	102.499	98.5925	95.846
Tmem132d	1.76717e-06	-1.52827	0.975885	0.946351	0.972069	0.749776	1.34441	1.20201	3.20557	3.07185	2.74683	2.63352	3.19362	3.00455
Pkia	1.77134e-06	-1.15272	20.837	24.2177	23.3146	24.4788	21.0101	22.9619	43.5286	52.9267	51.4416	53.6639	49.1917	53.444
Acox1	1.77648e-06	-1.07453	21.1485	23.4452	24.7462	21.2639	29.9596	23.7066	50.3651	47.7438	48.7827	50.4781	54.445	52.0236
Clvs1	1.77867e-06	-3.81209	0.033508	0.220082	0.2049	0.280949	0.136671	0.310303	2.94162	2.55891	2.50831	2.81792	2.69137	3.14629
Sgms1	1.78439e-06	-1.86425	1.89081	1.27074	2.07145	2.16023	1.48607	2.44736	6.50757	7.08724	6.63994	6.97535	6.78172	7.24614
Cyfip1	1.79214e-06	-1.00707	6.12308	6.53352	6.86114	6.95302	6.14545	7.28725	13.5944	13.5278	12.716	13.5511	13.4276	13.382
Nap1l2	1.79902e-06	-1.70793	14.3011	16.6061	20.3368	16.4348	15.2308	21.4852	50.6943	62.2866	58.7469	58.9679	51.672	58.6809
Magee1	1.80097e-06	-1.53179	26.1137	28.2446	28.7741	26.0224	33.9114	31.0671	83.0431	74.8856	79.7353	87.6776	91.515	86.6392
Grid1	1.81294e-06	-1.81955	3.44215	4.37604	4.73486	4.25085	3.65806	4.31778	14.8535	14.781	14.4008	13.1791	15.2003	15.0505
Cdc37l1	1.81619e-06	-1.2173	5.81764	4.8285	5.5249	5.13903	5.87298	6.27149	12.3468	12.7612	12.7175	13.0987	12.4677	14.3935
Plekhm3	1.82352e-06	-1.58008	1.55228	1.50422	1.48798	1.56065	1.87138	1.49702	4.81097	4.71173	4.27103	4.36931	5.07111	5.09044
Sema6d	1.82955e-06	-1.89943	3.70207	4.10015	4.35838	3.99213	4.33297	4.12606	16.5611	15.2694	14.0495	14.399	15.9906	15.5481
Negr1	1.84008e-06	-1.46452	8.04839	9.85652	11.4822	10.3556	7.66683	8.65063	22.3885	26.9921	26.3797	27.0624	24.4976	27.3893
Ptgr2	1.85919e-06	-1.34335	4.41777	3.39781	3.89518	4.95833	5.00272	4.41974	11.9245	10.6289	10.7662	11.0558	10.8158	11.0134
Rab2b	1.86917e-06	-2.73899	1.53439	0.799208	0.928795	1.5724	1.87494	0.46757	8.62589	7.56612	6.76837	8.84642	8.07008	8.03891
Epc1	1.86926e-06	-1.2935	3.32496	4.04216	3.50615	3.51657	3.8047	4.33403	8.40168	8.84643	8.72211	9.00661	9.66877	10.5768
Pik3cb	1.87764e-06	-1.20809	1.59393	1.84115	1.90506	1.53102	2.05594	1.69005	3.99693	4.1026	4.47507	4.01226	4.32563	3.61647
Slc8a1	1.8814e-06	-2.20193	1.23382	1.38483	1.69182	1.39589	1.17942	1.60261	5.65867	7.14412	6.88167	6.28487	5.95043	7.13488
Arhgap20	1.88606e-06	-1.72418	2.46615	2.86197	2.53635	2.44049	1.86586	2.43117	7.77476	7.92517	7.6791	8.1697	8.36896	8.3262
Shisa9	1.89734e-06	-1.94036	3.5235	4.63246	5.19545	3.99514	4.73747	4.38046	17.4875	17.3142	15.7184	15.6997	17.7449	17.6062
Usp25	1.9119e-06	-1.63349	1.92043	1.6447	1.79451	1.94918	1.29862	2.13573	5.2537	5.4145	6.21321	5.53514	5.1687	5.74682
Nanos1	1.92033e-06	-1.21205	4.04786	4.60333	3.85052	4.67944	4.39573	4.40635	9.0472	9.74856	9.39287	10.7918	10.7722	10.4418
Efr3b	1.92437e-06	-1.46752	10.3779	11.3864	12.8389	11.3776	13.9791	11.7548	34.6078	30.9298	32.5379	30.672	34.7506	34.8258
Tex2	1.92746e-06	-1.32823	8.63133	8.6081	9.10465	8.48733	10.4748	8.70935	24.1231	23.4179	21.9772	21.9275	22.3056	21.8787
Msl2	1.9324e-06	-1.65737	3.26899	3.51215	3.49384	3.28062	2.90749	3.24338	10.1177	9.46994	10.6094	10.2982	10.3683	11.2987
Plaa	1.94049e-06	-1.34029	2.35511	2.86727	2.45478	3.15714	2.19255	2.81398	5.91004	7.06309	7.08507	7.22693	6.37244	6.45168
Pdcd6ip	1.95141e-06	-1.04444	8.58921	8.66511	9.61776	8.33104	7.57475	8.59807	17.8453	17.3833	17.1217	18.3706	17.226	18.0191
Gpd1l	1.9533e-06	-1.56842	5.77218	8.21478	6.62933	7.27203	7.95645	6.6512	22.036	21.9539	19.4073	19.9507	21.2929	21.3933
Rad21	1.96734e-06	-1.12943	15.6357	14.7235	17.1108	15.2889	14.4184	15.7358	31.4243	34.9921	34.8599	34.6793	34.5225	32.7901
Jarid2	1.96775e-06	-1.21779	1.82898	2.31026	2.84135	2.27724	2.41007	2.61585	5.49991	5.47385	5.8103	5.37215	5.69774	5.36852
Nup153	1.98175e-06	-1.82017	2.20632	1.79268	1.8546	2.13582	2.28094	2.07435	7.63336	6.23445	6.62533	7.45831	7.69568	7.94492
Med14	1.98635e-06	-1.5035	2.50745	2.45607	2.78236	2.47636	2.41249	2.98681	7.50684	7.3528	7.03728	6.63382	7.41044	8.35054
Gfpt1	1.98671e-06	-1.65888	4.2855	4.4071	4.84506	5.11623	3.83424	4.90706	13.7673	13.9022	13.3705	14.827	15.1586	15.4807
Fbxo33	1.98747e-06	-1.38253	4.85529	6.69497	6.28269	6.10359	6.73735	6.23582	14.2548	15.8822	17.7899	16.6746	15.6634	15.9681
Ugdh	1.99092e-06	-1.04538	5.86738	6.46677	5.87615	6.72308	5.80844	6.24893	11.9106	11.9887	12.8719	13.9709	12.5569	13.0466
Kpna3	1.99598e-06	-1.18642	7.99477	8.55267	9.13309	10.1963	8.51301	9.06315	17.3152	21.2367	21.0096	21.6594	19.7036	20.7276
Armcx3	1.99978e-06	-1.44303	8.34241	8.1495	9.06447	8.28832	6.60874	8.48308	20.6244	23.6444	22.9186	23.5227	21.3749	20.9688
Cpsf2	2.01831e-06	-1.23098	2.49048	3.27419	3.95026	3.58901	2.72421	3.16653	6.89441	7.66023	7.50171	7.96787	7.59555	7.43514
Trappc10	2.03557e-06	-1.44853	7.44409	7.73251	8.97583	7.60829	10.3426	8.66373	23.7931	22.2635	21.5047	23.4757	23.7774	23.7438
Ednrb	2.04104e-06	-1.60261	7.35977	8.47188	7.99879	8.22735	7.09553	7.85674	21.1375	26.1342	22.8131	25.664	23.9618	23.055
Rnf14	2.04135e-06	-1.11419	33.7621	41.6247	42.0919	35.8411	44.3224	40.8124	86.6707	86.4315	86.6317	86.2061	84.421	85.8302
Xylt1	2.04868e-06	-2.47733	0.583858	0.881439	1.16861	0.828582	0.960073	0.821872	4.7467	4.70549	4.62702	4.5184	5.3612	5.24568
Scrn1	2.04876e-06	-1.36185	22.4181	27.465	26.1625	23.8108	27.7193	27.2515	66.9942	64.2182	63.1717	67.4418	72.053	64.0493
Shh	2.05465e-06	-1.36166	1.76313	2.10981	2.56264	2.04586	1.52039	1.88395	5.27765	4.96333	6.05928	4.95451	4.42827	4.86109
Glyr1	2.07115e-06	-1.40891	20.7284	21.6897	26.0298	22.5495	24.3593	25.5165	61.8668	62.0783	57.4605	63.307	65.9745	63.3828
Trp53bp2	2.08156e-06	-1.16876	4.53577	4.06814	4.68236	4.36621	4.53362	5.07811	10.0841	10.4254	10.0697	10.7545	9.82021	10.1412
Mfap3	2.08899e-06	-1.94727	1.36546	1.48078	1.23033	1.32548	1.72097	1.21855	5.35147	4.97475	5.03847	4.98902	6.15146	5.66359
Map9	2.11134e-06	-1.69958	3.3664	4.33439	6.01767	4.3569	3.89762	5.03791	12	14.9073	15.3465	15.8031	14.579	15.097
Ccser2	2.13336e-06	-1.30894	5.01177	4.08859	5.23979	5.26888	4.13835	5.78494	11.4511	12.3427	11.7834	12.5425	12.0863	12.963
Edem3	2.15474e-06	-2.88414	1.35448	1.54145	1.48672	1.38647	0.998014	1.36853	8.89381	9.23162	10.2787	10.3231	10.2343	11.1015
Stard4	2.15826e-06	-1.28261	2.8676	3.57202	3.58608	2.5536	2.80697	3.06755	7.28295	8.43593	7.98682	7.34948	7.1484	6.69058
Adgrb3	2.15828e-06	-1.49652	3.3351	6.24529	4.82836	4.84046	3.62772	4.96528	13.2166	13.5075	13.0712	13.3091	12.2807	13.1746
Cd47	2.16007e-06	-1.28969	9.37098	11.7923	11.9795	11.5214	11.4293	10.9713	26.9633	28.1762	28.9525	24.911	26.5469	28.407
Map3k12	2.17721e-06	-1.39406	7.54904	7.19054	9.62969	8.32124	10.6738	8.37609	22.8389	20.675	21.056	23.1585	25.2339	23.0206
Cdh2	2.17746e-06	-1.90627	6.96189	6.90876	8.76155	7.66427	6.81872	10.0861	29.0527	32.3312	28.9864	26.7257	27.8187	32.0141
1700025G04Rik	2.17919e-06	-1.22344	2.31313	2.95581	2.92841	2.77098	3.06575	3.12988	6.77993	6.89125	6.63582	6.63243	6.69466	6.4443
Gad2	2.1807e-06	-2.36048	11.2311	13.3296	14.18	14.7687	12.0985	17.2511	72.5966	76.2209	75.343	69.7473	59.9825	71.6241
Rcan3	2.19285e-06	-1.43559	8.3546	9.56248	7.64869	7.80237	11.79	8.75972	24.7026	22.6382	21.717	25.0366	26.9269	24.8226
Senp7	2.19622e-06	-1.41712	1.37261	1.44946	1.11905	1.87747	1.35033	1.42109	3.49205	4.02962	3.50903	4.02178	3.72891	4.1583
Slc12a6	2.2051e-06	-2.06707	3.00141	3.09797	3.37259	3.23802	3.63099	3.28505	14.0447	13.4052	12.6861	12.3981	14.5647	15.1412
Akap12	2.21875e-06	-1.34547	5.14223	5.53043	4.56896	4.96547	5.52875	4.65954	12.7697	12.319	11.895	12.5766	14.2107	13.4678
Prkacb	2.23418e-06	-1.69523	34.6221	36.9361	40.4973	38.0741	34.3614	40.1869	111.852	115.683	113.868	125.784	127.048	133.335
Apba1	2.24107e-06	-1.72568	9.71478	10.4109	11.376	9.33292	13.0239	12.0487	39.7877	34.8152	37.0758	34.7962	35.7734	35.7307
Slc30a5	2.25029e-06	-1.14034	6.23016	7.61009	5.85271	6.87853	5.31406	7.11444	13.1596	14.9591	13.6361	14.6816	14.592	14.9406
Arfgef3	2.25856e-06	-2.08711	2.05691	2.37452	2.47116	2.64556	1.56673	2.54431	8.12036	9.60946	9.86496	10.1879	9.44824	10.8064
Cpox	2.26055e-06	-1.30884	7.24663	5.3964	5.82344	5.73684	6.40124	6.09253	16.3008	15.5776	15.3234	15.3031	14.1858	14.2233
Stk40	2.26938e-06	-1.1095	3.83755	4.22096	3.35818	3.89371	4.25218	4.03621	8.8638	8.05953	8.37381	8.56275	8.48171	8.57772
Psmd5	2.27372e-06	-1.11002	4.65541	5.57367	5.7622	5.55029	6.6111	6.07318	12.0398	11.4528	11.9913	12.678	13.7105	12.0036
Gapvd1	2.2767e-06	-1.14917	5.40755	4.82727	5.04943	5.41223	5.79578	5.4463	11.9513	11.6633	10.994	11.1632	12.0567	13.007
Ank2	2.2802e-06	-1.63329	8.88313	9.36589	11.4578	10.1274	8.79515	10.6353	30.722	30.0351	28.9358	29.518	30.5066	34.1337
Haus2	2.28177e-06	-1.2492	2.82251	3.82041	3.85213	3.65271	3.79788	2.85566	7.62504	8.55428	9.48189	8.45668	7.96422	7.36457
Ints8	2.29245e-06	-1.73422	1.2667	0.923466	1.51089	1.40069	1.24629	1.45092	4.05374	4.02006	4.08683	4.44634	4.43926	4.90081
S100pbp	2.30544e-06	-1.10992	3.76171	4.22543	3.4598	4.43906	4.62576	4.48465	8.10336	8.30044	8.70655	9.45469	9.76524	9.62017
Zfp142	2.30903e-06	-2.00978	1.06559	1.23963	1.2272	1.15787	1.46651	1.34303	5.34453	4.56604	4.69097	4.7282	5.58841	5.28519
Pwp1	2.3186e-06	-1.06941	3.99252	4.70278	4.20468	4.29298	4.45091	3.39243	8.60261	9.57136	9.19498	8.85979	8.138	8.17368
Ifngr2	2.335e-06	-1.06983	4.30113	4.58299	4.76996	4.47281	5.11411	4.26946	9.32425	10.5026	9.20181	9.48466	10.3157	8.9207
Msi2	2.33821e-06	-1.62076	6.09613	6.24504	7.49956	6.07267	6.05192	6.91308	19.1894	20.9176	21.2274	18.5591	17.5655	22.1063
Cmip	2.3613e-06	-3.39464	5.89947	4.9186	6.60196	5.55665	6.57478	6.26082	67.0865	57.764	54.3695	61.1785	69.4561	66.7797
Wee1	2.36162e-06	-1.66628	1.82776	2.03972	1.59886	1.80748	2.94591	2.35201	6.09152	7.39225	5.68663	6.65608	7.37977	6.69579
Asb8	2.36434e-06	-1.11204	8.24949	9.22776	10.8531	11.3198	14.0415	10.6098	22.0277	22.0406	22.4059	25.238	24.7796	22.4966
Klhl7	2.39803e-06	-1.56315	9.74542	11.78	12.4508	11.4511	11.4934	12.6562	29.235	33.4765	33.2256	35.8352	36.1928	37.6332
Rnf4	2.39808e-06	-1.2091	7.60992	8.6323	8.95687	7.99716	10.5803	8.9336	20.1248	21.1718	21.0646	19.9094	20.4291	19.1628
Tmem230	2.39853e-06	-1.10509	3.79206	4.61788	4.0998	3.83239	4.54906	4.05191	9.1792	8.88334	8.85049	8.915	8.70224	9.12541
Erlin1	2.40088e-06	-1.04247	3.27403	3.22781	3.09055	2.74982	3.20918	3.64348	6.76011	6.25769	6.68499	6.05736	6.22003	7.55658
Jkamp	2.40921e-06	-1.09389	10.0502	12.4207	12.7501	13.4738	9.98692	12.2825	24.1485	26.9845	27.0181	25.0466	24.263	24.0125
Edem1	2.42782e-06	-1.52874	1.48659	1.28462	1.49414	1.70007	1.82386	1.30031	4.05455	3.92109	4.34314	4.44717	4.77611	4.68443
Ppm1a	2.44492e-06	-1.13031	11.8729	14.5381	14.4213	12.78	14.6937	14.3348	30.1262	30.3975	30.5033	31.3548	29.1214	29.4027
Acsl6	2.45127e-06	-1.39952	7.86661	8.99562	9.60905	8.15227	7.25953	9.38292	22.7918	23.7033	25.388	22.1347	19.7084	21.5204
Dgke	2.45927e-06	-1.27954	2.85215	4.33102	5.15	4.7898	3.48224	4.30985	9.45488	9.59935	10.5691	10.3504	10.1664	10.344
Nlk	2.46229e-06	-1.25293	3.48146	3.64968	3.63511	4.12422	2.89601	4.3471	9.39047	8.86447	9.09496	8.86841	7.39004	9.14157
Ap1g1	2.47398e-06	-1.55284	5.03071	4.86426	5.14525	4.41398	5.47037	4.70629	14.4269	13.4311	13.5313	14.2808	15.5476	15.7175
Rsf1	2.49463e-06	-1.55436	1.45012	1.49288	1.67197	1.6582	1.60915	1.72963	4.19893	4.55689	4.80991	5.05081	4.35938	5.25466
Tbc1d23	2.5272e-06	-1.16756	1.91979	2.89171	3.20837	2.75004	2.60284	3.12097	4.8016	6.31959	6.73092	6.73963	5.98746	6.47085
Cdc42bpa	2.53803e-06	-1.36565	9.40724	7.91829	10.088	8.79457	8.95319	9.80759	23.5445	24.0915	22.947	21.7685	23.1942	26.1046
Rprd1a	2.53847e-06	-1.16274	9.68886	11.5297	11.2161	9.60168	12.0182	10.0908	23.4125	24.5738	22.3815	24.1436	24.28	24.8182
Gpalpp1	2.53892e-06	-1.32972	2.81485	3.21623	2.95673	3.29319	3.07051	2.66383	6.98234	7.44626	8.28853	8.20775	7.331	7.02631
Usp9x	2.55521e-06	-1.84145	5.73148	6.15815	6.37348	6.11631	5.22677	6.80941	19.0124	21.6032	21.4362	22.3191	21.0374	25.0947
Kcnd3	2.56844e-06	-1.97471	2.51438	3.23204	3.92955	3.41658	3.09601	2.93592	11.6753	12.6955	12.1511	11.777	13.7722	13.0974
Gla	2.57153e-06	-1.24128	1.50494	2.26811	2.07971	1.59345	1.75462	1.74138	4.33951	4.81753	4.28288	4.32775	4.06642	4.0342
Copg1	2.58052e-06	-1.32018	25.9598	29.2798	29.6026	27.3132	33.2435	29.2129	77.6128	67.6699	70.2683	71.0962	77.7295	71.625
Zswim6	2.58856e-06	-1.94713	1.18188	0.736666	1.17223	0.643538	0.678592	0.915087	3.73074	3.16643	3.96131	3.46068	2.7737	3.45225
Tril	2.59006e-06	-1.52397	5.74179	6.7614	7.6863	6.96432	6.87488	7.02358	19.725	21.1141	21.4341	18.9549	18.2359	18.5948
Prkaa1	2.60227e-06	-1.36128	3.68092	3.982	4.42876	3.84083	3.61763	4.35925	9.03136	10.5131	10.2887	10.8797	10.4522	10.2612
Fam102b	2.61002e-06	-1.6521	2.73104	3.51376	3.61125	3.81179	2.42064	3.7406	10.7631	11.4601	10.5878	10.228	8.77904	10.5029
Rabgap1	2.63597e-06	-1.09871	4.08343	4.73005	5.43128	4.71773	5.77229	5.00596	9.42884	10.1462	10.2105	11.1359	11.6857	11.0862
Slc6a1	2.64299e-06	-1.54527	37.6483	41.8595	47.1773	41.6991	49.6955	46.713	137.704	120.56	120.988	126.922	134.036	132.609
Cxxc4	2.69669e-06	-1.20449	3.37944	3.7957	4.63054	4.69831	2.96823	4.17257	8.10928	9.39582	9.22334	9.34347	8.47437	9.94446
Nr3c1	2.69805e-06	-1.7361	3.5941	3.37901	3.23487	3.33724	3.01689	3.49525	10.2002	12.0138	11.367	10.5892	10.5041	12.1437
Mapre2	2.70482e-06	-1.34699	15.0935	16.1516	18.1921	16.547	18.2656	18.7603	46.7583	43.4901	42.4846	40.7108	44.216	44.3782
Smim17	2.70592e-06	-1.28415	5.04235	6.87091	6.25651	6.51088	5.60696	7.08758	14.5611	14.1004	15.6472	16.3967	14.3097	16.008
Bcl2l13	2.70807e-06	-1.70011	1.72955	2.20585	2.15943	2.11341	2.25875	1.66426	6.93869	6.09624	6.77499	6.35733	7.19556	6.05486
Kansl1	2.71169e-06	-2.13358	3.00387	2.48877	2.93318	2.38765	2.36156	2.76536	11.5553	10.3675	11.6613	11.6126	11.2853	13.4652
Arid4a	2.71952e-06	-1.69243	1.83095	1.41191	1.81614	2.23879	1.64193	2.20417	5.21672	5.8641	6.06796	6.44045	5.59895	6.82901
Dhcr24	2.71986e-06	-2.1967	6.90092	8.82355	9.09565	7.30788	10.8056	7.68074	41.8927	35.1441	36.2258	37.8038	41.3665	39.5975
Map2	2.73115e-06	-1.6022	20.9806	21.5994	25.3694	21.585	19.5101	25.5028	61.0991	68.4465	65.0925	69.324	67.0039	77.5272
Atp13a3	2.73947e-06	-2.13564	1.38296	1.38263	1.77898	1.6143	1.71886	2.06719	6.2061	6.8018	7.42499	7.41808	7.15612	8.69404
Mtmr6	2.74609e-06	-1.05605	15.8237	16.135	17.4476	15.0452	15.3158	17.0563	31.912	32.9229	32.2006	33.7604	34.8426	35.6796
Ranbp9	2.75095e-06	-1.19852	9.67752	8.68309	9.94753	9.80778	10.4749	9.69303	20.0806	22.0917	22.6451	23.1369	22.1375	23.6715
Naa60	2.75185e-06	-1.24539	8.9587	10.1511	10.1248	9.86983	14.6028	11.8653	25.0659	25.6804	24.4451	26.8014	27.0346	26.4335
Gng2	2.75203e-06	-2.40427	9.06063	10.2427	11.5023	8.72495	9.84816	11.367	47.19	50.5201	51.204	57.3444	57.038	58.2725
Sv2a	2.75963e-06	-1.93621	34.5761	40.6675	44.6606	44.9091	52.0188	46.5095	185.038	155.407	164.824	165.005	170.985	166.544
Atf7	2.76636e-06	-1.2756	1.41483	0.913142	0.919357	1.30922	1.38699	1.41844	3.04276	2.90031	2.70973	2.7736	3.25722	3.13975
Npnt	2.77139e-06	-1.66668	0.813687	0.766663	0.857974	1.06737	0.638387	0.962	2.60229	2.57683	2.86843	2.68086	2.7885	2.69409
Gpr158	2.78188e-06	-1.9497	3.70492	3.69955	3.82441	4.70301	3.69471	4.50864	15.3511	17.1799	15.1976	14.3842	15.415	15.7052
Fchsd2	2.78978e-06	-1.57899	5.16402	4.66501	5.26371	5.17619	5.33595	5.57519	15.5539	14.8978	13.5345	15.8497	16.7231	16.595
Atp1b1	2.81245e-06	-1.69735	134.316	166.607	213.91	160.53	157.594	182.037	580.184	574.003	578.009	531.923	507.254	520.307
Pik3r1	2.81337e-06	-1.34629	5.93543	5.45579	6.29053	5.91545	4.93832	6.60843	14.5115	16.2341	15.2936	15.2465	13.0491	15.0212
Ddi2	2.83577e-06	-1.32789	2.78974	2.45672	2.97781	2.83246	2.73491	2.82968	7.13981	6.39399	6.72633	6.70965	7.70075	7.05497
Tmem170b	2.84243e-06	-1.54633	2.84435	3.29635	3.10476	3.27422	2.97925	2.68035	7.8283	9.08323	9.19283	9.11149	8.39484	9.48629
Serinc5	2.84559e-06	-1.41452	5.6867	6.3161	6.71998	7.49066	5.7552	6.77886	17.4537	18.5981	17.6354	16.9331	16.309	16.3606
Tmem132b	2.85968e-06	-1.58692	2.96917	3.23526	4.21042	3.42693	3.13651	2.88312	10.4865	10.5738	10.2623	9.20208	9.45067	9.6896
Ube2h	2.87522e-06	-1.11657	13.8378	14.5135	14.462	14.8013	15.77	14.8912	33.9173	29.7989	33.0462	31.4176	32.6987	30.5311
Zfp451	2.88152e-06	-1.21473	1.64932	1.75163	1.77564	1.64402	1.83793	1.93334	3.66606	3.9409	4.15412	3.95905	4.1669	4.69638
Sptan1	2.88954e-06	-1.2236	35.7738	35.7012	41.6799	36.8589	41.0749	36.6559	94.0014	88.464	84.1668	85.5079	89.5216	90.187
Naa25	2.9066e-06	-2.19559	2.06057	1.32504	1.56673	1.73949	1.76994	1.89368	7.27489	7.08542	8.48101	7.84111	7.96083	8.79263
Pip5k1b	2.91593e-06	-1.77034	1.92551	2.1573	2.70574	1.93502	2.8154	1.77805	7.70989	8.14319	7.41632	7.11079	7.51011	7.53869
Prepl	2.9312e-06	-3.37884	7.08955	7.20943	9.99817	6.39785	9.75	7.60296	85.0304	75.532	73.6934	81.5582	94.5292	89.471
Zfp462	2.93531e-06	-2.09103	1.54456	1.22261	1.38579	1.28073	0.923711	1.87558	5.65255	5.49374	5.35972	5.64086	5.94074	6.9893
Trim35	2.94879e-06	-1.03012	22.714	25.1395	25.0105	22.8688	31.5413	23.0298	52.5444	49.2147	48.8014	51.6473	54.8395	49.9024
Ppm1k	2.95166e-06	-1.52462	2.92903	2.66692	2.9146	2.76284	2.97342	3.42186	8.04834	9.22393	8.64084	7.76756	8.06607	9.08783
Sos1	2.9601e-06	-1.92855	2.8197	2.19997	2.80993	3.24324	2.25838	3.20229	9.41331	9.51349	10.1146	11.1338	10.7417	12.0214
Otud6b	2.96441e-06	-1.42036	8.10177	7.31041	7.30992	7.92199	6.59259	9.21871	19.1101	22.0111	21.2306	20.0225	20.4204	21.5439
Utp6	2.97092e-06	-1.06221	5.67561	5.5633	5.97485	5.37336	5.24055	5.36163	11.0096	12.0666	11.113	12.1243	11.4551	11.5351
Kbtbd4	3.01596e-06	-2.48882	0.668815	1.17328	0.738572	1.02303	0.573437	1.71257	5.10973	5.65189	5.44004	6.36677	4.91701	5.5746
Ddx3x	3.01871e-06	-1.4896	16.3852	16.9256	16.9275	21.1353	14.9073	17.1589	42.034	50.7788	52.2299	52.1837	46.0571	47.1863
Tent4b	3.04033e-06	-1.72452	3.80369	3.31602	4.11917	3.44394	3.63613	3.98088	12.2788	11.0966	11.6836	12.8049	11.9054	13.9248
Thumpd3	3.0417e-06	-1.164	3.01338	2.67751	3.0663	3.02209	2.8477	2.57991	5.87993	6.41447	6.65358	6.54063	6.87156	6.19666
Npffr1	3.0512e-06	-2.12628	0.485275	0.339531	0.627107	0.766695	0.942059	0.623008	2.55927	2.22407	2.50442	3.21118	3.0794	2.94087
Strn	3.05375e-06	-1.24495	3.23723	3.24403	3.49521	3.9116	3.12842	3.44336	7.71496	8.71277	8.5277	8.17442	7.25665	8.10557
Dck	3.05564e-06	-1.96239	2.16942	2.26569	1.76007	2.53968	2.36331	2.73505	8.88769	9.60573	9.29584	8.2202	9.12667	8.77304
Wnk3	3.0565e-06	-1.83159	0.963765	0.979408	1.39055	1.32755	1.40296	1.3918	3.80477	4.51109	4.14086	4.60996	4.51456	4.95692
Arxes1	3.05879e-06	-1.12567	14.7999	19.2223	20.4486	17.868	20.0686	19.7818	38.8588	38.82	40.048	42.555	44.0137	40.5051
Zmym4	3.06633e-06	-1.68037	2.8969	2.53556	2.72103	2.95435	3.07984	3.22606	8.37987	9.0574	8.95163	8.8038	10.387	10.233
Lrba	3.06903e-06	-1.90531	0.539428	0.767829	0.648001	0.824001	0.692816	1.04816	3.02635	2.74854	2.64534	2.7129	2.83467	2.96449
Gmps	3.07027e-06	-1.38797	4.99298	5.42604	5.42595	5.39915	5.75324	5.5732	11.9057	14.5917	14.6087	14.9196	14.4999	14.715
Pdzd8	3.07118e-06	-1.87698	3.4541	2.87462	3.42173	3.26253	2.9443	3.69154	11.4371	13.251	12.758	11.8001	10.8673	12.0577
Hccs	3.07597e-06	-1.3753	2.06926	2.17854	2.70786	2.24563	1.46394	2.26246	4.94512	6.0305	5.98286	5.99643	4.69928	5.8831
Vstm2a	3.07644e-06	-1.83689	5.24056	6.51683	7.22288	6.85587	6.45872	6.93508	19.8501	25.3412	23.8384	24.0271	21.3845	25.7032
Arhgap24	3.10152e-06	-1.1065	2.84399	2.99779	3.00566	2.4556	2.77365	3.37391	6.4746	6.45704	6.30091	6.24682	5.95469	6.14113
Atf2	3.12927e-06	-1.43597	4.69086	4.97938	5.56292	5.6737	4.16298	5.83594	12.4598	15.0069	14.2673	13.2849	13.5802	15.0206
Abca5	3.13674e-06	-1.78901	1.15701	1.74638	1.82113	1.45565	1.46868	1.47847	4.68064	5.17574	5.27417	5.56276	4.98993	5.85868
Pnma2	3.15131e-06	-1.41642	5.46042	5.64477	5.82074	5.56379	6.5455	5.52973	15.0287	14.7339	13.7833	15.2254	17.1278	16.3625
Rasal2	3.1516e-06	-2.01431	1.09165	1.35534	1.4772	1.35766	1.13849	1.28601	5.12906	4.52346	5.54356	5.22094	4.97494	5.74079
Bsdc1	3.16527e-06	-1.08482	9.68178	11.0068	11.7155	11.4634	12.2638	10.9893	23.8621	22.1103	22.7263	25.1196	25.5809	22.9714
Foxn2	3.16863e-06	-1.16279	1.53459	1.29235	1.3525	1.22517	0.798659	1.26537	2.79363	2.91126	2.99308	2.71341	2.30288	3.00725
Copg2	3.17389e-06	-1.24444	7.47141	9.28822	10.1455	8.37641	10.0657	9.105	21.0375	22.9121	20.3811	21.7697	22.0038	20.9079
Gpr26	3.17442e-06	-2.28989	1.01045	1.41742	1.77957	1.64102	1.45998	1.86231	7.98033	7.87066	7.21384	6.91398	7.26236	7.60532
Ccdc92b	3.17629e-06	-1.39372	3.49448	3.81437	3.92021	3.51727	4.93365	3.84608	11.253	9.74471	10.2742	9.58423	11.1462	9.81384
Gnpda2	3.22179e-06	-1.00434	3.6034	3.82853	3.88945	4.5589	2.85781	4.55622	7.66239	8.05736	7.86512	8.61484	6.91865	7.61077
Txnrd1	3.22426e-06	-1.04639	9.49412	10.7558	11.1195	10.8321	12.5707	10.4399	22.8748	21.1898	21.1027	22.9988	23.859	22.6612
Dcaf1	3.23476e-06	-1.59438	1.77259	2.02821	1.86593	1.95306	2.26854	2.75934	6.60558	6.1022	6.26693	6.43711	6.5614	6.21832
Rap1gap2	3.23502e-06	-1.67948	6.09903	5.64728	7.56895	5.9277	7.82188	6.30963	21.3949	20.1861	19.8834	20.1281	21.2976	23.2316
Tmem198b	3.23537e-06	-1.84871	0.853321	1.16144	1.04174	0.473472	1.64545	1.27234	3.42733	4.12525	3.66054	3.81896	4.24672	3.94472
Pbx3	3.24315e-06	-1.70277	2.46269	2.77513	2.61949	3.27297	2.00804	2.63541	8.66086	8.90321	7.51253	8.72112	8.21401	9.33589
Rufy3	3.26547e-06	-1.00354	20.0135	20.3266	24.0725	20.7806	20.3111	23.0073	39.817	46	43.5235	42.8273	40.2853	45.2018
Fam120a	3.2701e-06	-1.0667	11.2046	11.8096	12.9218	11.8467	10.0319	11.808	24.4429	23.139	24.1682	23.7763	24.4006	25.9073
Arhgef11	3.27138e-06	-2.30648	2.32949	2.29023	2.88198	2.34217	2.83669	2.8986	14.3901	11.8178	11.7547	12.1471	13.6772	13.2792
Col4a3bp	3.27524e-06	-1.49586	6.04627	6.12847	6.24554	6.24253	6.91256	6.76847	16.0463	17.9062	19.2954	18.9178	17.1064	18.8696
Tmem167b	3.27606e-06	-1.45105	7.17757	6.64542	7.87652	5.62855	9.70604	6.19844	19.6382	20.47	19.0791	19.4728	20.2719	19.2691
Slc35b4	3.29548e-06	-1.08735	3.97172	4.70981	5.19839	5.08814	5.76781	5.43762	10.748	10.2738	10.0772	10.6089	11.2648	11.1408
Sacm1l	3.32034e-06	-3.91336	2.56567	1.60226	2.32865	1.5473	0.924567	1.51879	24.3105	27.9822	26.3256	23.3832	25.7882	30.2257
Rtn3	3.32211e-06	-1.179	94.5053	116.911	121.508	108.195	124.117	112.966	266.282	256.443	252.608	256.258	253.361	250.632
Nos1ap	3.35274e-06	-3.58362	0.497791	0.644693	0.852586	0.734815	0.986055	0.874019	10.3906	8.92591	8.07345	8.44456	9.69345	9.50037
Slc30a4	3.3529e-06	-1.48035	2.05747	3.01776	2.78022	3.28635	2.38975	2.68812	6.21568	8.54246	7.96396	7.6808	6.99848	7.85414
Csrnp3	3.35411e-06	-1.69618	2.74064	3.16815	3.05459	3.13005	3.33221	3.19718	9.26873	9.5125	9.34981	10.5155	10.2304	11.4686
Ppp2r2b	3.37529e-06	-1.39029	9.89169	10.9056	13.5416	10.7616	9.13328	12.8415	27.7083	30.1189	29.9641	29.5795	30.1253	28.3291
Tmem127	3.37943e-06	-1.33975	8.71536	11.1762	11.6988	10.4298	12.4284	10.4664	28.6885	26.7659	28.138	25.2594	28.068	27.3845
Ube3c	3.37983e-06	-1.24479	5.64405	5.97974	6.14366	5.42582	6.12602	5.51427	14.3712	13.6841	12.8426	13.4635	15.2287	12.9596
Bbs10	3.38049e-06	-1.97377	0.523429	0.480147	0.670013	0.317604	0.776843	0.560933	2.01271	2.24349	2.46963	1.65114	2.46842	2.2306
Map2k1	3.39228e-06	-1.28309	35.6931	40.5802	46.269	41.3394	39.5005	46.0581	101.805	101.195	98.1706	104.136	104.565	97.1659
Cyfip2	3.41505e-06	-1.79235	19.1886	23.3428	27.8784	23.5315	27.1409	25.3138	91.1249	86.7889	81.7385	80.892	83.0042	83.5359
Agl	3.41971e-06	-1.43244	1.57079	1.72083	1.95876	1.65804	1.90595	1.8208	4.73651	4.39779	4.48292	4.96544	5.20467	4.91723
Cggbp1	3.42068e-06	-1.0154	9.27061	8.29068	7.73908	8.40321	9.49009	8.70314	16.517	16.567	16.9128	18.187	18.2465	18.4769
Fam185a	3.42099e-06	-1.3922	2.4438	3.28619	3.19638	2.4242	2.60148	2.29249	7.09025	7.30024	6.97802	7.34794	6.7398	7.18223
Ckap5	3.42168e-06	-1.15016	11.282	11.2978	11.3906	10.6422	12.7069	10.6095	24.3943	26.6551	23.1461	24.4044	25.7657	26.3947
Klhl24	3.43475e-06	-1.29805	3.92543	4.12718	4.36814	3.66547	3.82029	3.68242	9.29082	9.18965	9.6356	9.41442	10.1244	10.3495
Prrc2c	3.43773e-06	-2.38187	2.79861	2.56877	3.42538	2.6911	3.00196	3.29335	15.0303	13.4619	14.7029	15.1379	16.4263	17.9079
Ccdc186	3.4815e-06	-1.48496	2.32628	2.41786	2.97434	2.5979	2.29455	2.62215	6.66319	7.21206	7.02644	7.04269	6.59878	8.09567
Kpna6	3.50493e-06	-1.31684	7.07336	7.98709	8.20022	7.33292	8.8774	8.59983	20.8864	17.7702	19.8888	19.3756	20.6067	21.226
Pcdha9	3.50542e-06	-3.54863	0.243754	0.146495	0.237132	0.063868	0.03222	0.151933	1.76837	1.63904	1.82095	1.35087	1.72942	1.93495
Necap1	3.52508e-06	-1.0168	29.9779	38.7582	38.7389	36.5592	40.7523	37.3189	72.8862	70.1874	75.7247	78.7195	77.2823	74.6129
Gk	3.53846e-06	-1.5367	1.29932	1.65652	1.97801	1.51561	1.56942	1.9315	4.54352	5.14215	4.87935	4.50813	4.26761	5.52821
Pcdhgc3	3.55692e-06	-2.83632	3.74985	4.67238	2.39327	2.42815	3.76323	3.45386	27.7404	24.1974	21.4368	23.0415	27.4459	22.2682
Foxo3	3.56576e-06	-1.48267	2.50949	2.46332	3.07593	2.77662	3.17102	3.24453	8.48444	7.91488	8.4429	7.78236	7.48508	8.07261
Megf10	3.56861e-06	-1.48246	1.58998	1.4363	1.88981	1.58428	1.41549	1.41229	4.51085	4.48578	4.91978	4.01811	3.77265	4.3579
Efr3a	3.57256e-06	-1.22672	4.41179	3.82917	6.27355	5.5473	4.41145	5.16517	10.9649	11.6015	12.2948	11.2192	11.3333	11.9504
Vgll4	3.59479e-06	-1.46926	2.4753	1.83025	2.04625	1.87861	2.76579	2.0825	6.00705	5.71207	5.33537	6.13691	6.51621	6.50457
Copb2	3.60746e-06	-1.20613	14.4827	14.2328	15.6485	14.5814	16.4592	15.7061	32.3148	37.5998	34.2008	36.235	36.0278	33.8305
Ranbp6	3.6111e-06	-1.73981	3.81234	3.52453	4.44385	4.27755	4.104	4.08174	11.8545	14.6905	13.3114	14.2026	13.6092	13.3047
Zxdb	3.63513e-06	-1.72861	1.40363	1.44729	1.06448	1.316	1.51272	1.72742	4.15663	4.5432	4.74275	4.77536	5.1051	4.75234
Fbxo34	3.63833e-06	-1.53908	2.44854	3.14081	4.23076	3.75998	3.34923	3.34092	10.262	9.2629	10.3354	10.3517	9.15823	9.5371
Stk24	3.64337e-06	-1.7073	4.97065	5.70931	6.30021	4.69831	6.95492	5.9029	19.0975	17.2489	17.3862	19.4799	20.077	19.4885
Nr1d2	3.64579e-06	-1.17941	8.10034	8.35467	12.7746	13.0829	9.21143	9.55234	18.2808	22.6677	25.5017	26.283	23.0039	22.5913
Adgrl3	3.64794e-06	-2.09994	1.66477	1.80701	1.77138	2.00138	1.20058	2.01429	7.89217	7.56567	6.95313	6.78387	7.16095	8.48298
Eif3a	3.64887e-06	-1.15908	13.7097	12.932	15.4663	13.7571	12.9396	15.3776	28.271	32.0368	32.1453	33.6716	29.4703	32.3967
Pptc7	3.657e-06	-2.64594	2.0812	2.27343	2.73692	2.47964	3.1972	2.53529	17.0872	16.7749	15.2364	16.9091	14.2805	15.4983
Dyrk2	3.67257e-06	-1.30935	1.62088	1.68366	1.83759	2.09116	1.80397	1.8456	4.07836	4.42444	4.62191	4.69792	4.12322	5.02512
Abcb10	3.70508e-06	-1.66471	3.06004	3.78795	3.80207	3.54904	4.75373	3.09079	11.8815	10.3466	11.0783	11.6512	13.5347	11.3971
Urb2	3.71152e-06	-2.6365	0.44358	0.346839	0.365479	0.294121	0.358978	0.287772	2.11395	2.05948	2.28967	2.13684	2.53034	1.90791
Ntn4	3.71284e-06	-1.44126	1.11138	1.24479	0.982901	1.24951	1.06127	1.09997	3.09059	2.97414	2.73875	3.51718	3.13785	2.87125
Znrf3	3.72251e-06	-2.16612	0.357555	0.359748	0.431697	0.371396	0.550266	0.382057	2.08608	1.73163	1.8466	1.79807	1.80861	1.7372
Hcfc2	3.76687e-06	-1.30056	2.26943	1.59032	2.03349	2.25815	2.23464	2.19914	4.74751	4.64904	5.15769	5.80102	5.42661	5.21853
Casd1	3.77069e-06	-1.61708	6.38534	6.53287	6.66122	6.00537	5.3397	7.34534	18.0214	19.8451	19.804	19.8479	20.9092	18.967
Pafah1b1	3.77193e-06	-1.71376	22.979	23.5245	25.7095	23.6419	20.1131	25.658	67.2991	86.403	81.5782	78.1223	71.4962	79.6542
Siah3	3.77221e-06	-1.64225	0.884637	0.965123	1.05246	1.18109	1.38234	1.24328	3.49722	3.34678	3.7042	3.28459	3.86197	3.24728
Ank	3.78067e-06	-1.23567	22.0573	22.2873	25.3825	22.0303	24.7794	22.8183	59.0304	55.8649	52.7068	51.1411	54.1947	55.23
Slc9a6	3.78071e-06	-1.17914	12.8915	14.155	14.0456	15.5733	16.4832	13.0987	29.2597	32.8328	29.5151	33.5636	35.9824	34.1467
Spred1	3.78308e-06	-1.25923	9.58299	8.87341	9.42745	9.43632	9.08484	10.6776	21.8286	24.5886	20.8663	22.3168	22.3275	24.7098
Mkln1	3.79596e-06	-1.36672	3.05611	3.35718	3.62285	3.77406	3.42219	3.47016	8.06256	8.93294	8.43394	8.87131	9.13633	9.95156
Bag4	3.81328e-06	-1.40404	4.34427	5.64047	5.52418	5.29011	5.05254	5.01416	11.9279	12.6833	14.3786	14.8336	14.1262	13.7341
Ptpn9	3.81567e-06	-1.64571	4.05422	4.19053	3.64301	3.3344	4.52277	3.8349	12.7042	11.8687	10.5624	12.0491	13.1248	13.4726
Rmc1	3.81637e-06	-1.18288	4.08237	3.8169	4.22429	4.30129	5.46197	4.38718	9.3272	9.8904	9.26817	10.0108	10.3095	10.8437
Champ1	3.81731e-06	-1.38722	3.57388	4.23394	4.28987	3.73259	4.75534	3.84878	10.8981	10.4359	9.8913	10.3134	10.9679	11.4074
Cadm1	3.82727e-06	-1.2465	11.2243	10.5307	11.8427	13.8409	11.8212	11.7133	25.4826	28.6732	27.8485	28.8009	27.0789	30.5107
Slc39a9	3.84554e-06	-1.10387	4.43596	5.41788	4.91235	5.19238	5.91187	4.69378	10.8352	10.1306	10.4443	10.995	12.2235	11.0631
Zmynd11	3.86965e-06	-1.46995	10.3002	9.17542	12.918	11.1688	9.0506	11.1584	28.0502	28.1422	28.9509	28.9318	29.4174	33.1624
Slmap	3.87114e-06	-1.38181	4.90927	5.07118	4.79259	5.46878	4.69258	5.20063	11.9181	13.8673	14.1481	13.1374	11.966	13.4933
Myh10	3.88851e-06	-1.58544	8.94151	11.4532	12.1247	10.6994	11.6189	11.1911	34.8477	32.6932	30.8403	31.0876	34.4464	34.2364
Dcaf7	3.91019e-06	-1.34074	16.0886	17.4367	19.649	18.6556	23.5636	19.8507	49.2558	42.3938	47.1767	51.9952	53.3744	47.6962
Gopc	3.91625e-06	-1.39691	3.83623	3.41488	4.47738	4.11047	3.09346	4.27468	9.25197	10.1356	11.3845	10.0296	10.2824	10.0289
Tmem263	3.91659e-06	-1.06082	4.64798	4.70526	5.55893	4.8787	3.76548	5.10796	9.48524	9.99618	9.82404	10.8476	9.31357	10.3304
Gabra3	3.91715e-06	-1.11072	12.2009	15.5492	15.9988	14.019	17.0508	15.0977	29.5567	35.6013	33.6076	32.2503	31.0704	32.0912
Ebag9	3.91851e-06	-1.03607	5.36958	5.34873	5.30346	6.03578	4.35607	5.14808	10.1279	11.6448	10.6407	11.1644	9.72311	11.4207
Usp12	3.91992e-06	-1.60283	3.09612	3.38364	3.15997	3.57512	3.88284	3.25024	11.4324	10.2085	9.98796	10.5515	9.87742	9.74687
Mfsd14a	3.9203e-06	-1.73892	5.16482	6.37739	6.30348	5.52243	4.61197	4.01921	16.7136	16.9435	18.0947	18.9664	17.6663	18.4247
Nhlh2	3.92176e-06	-1.68812	0.427953	0.897399	0.624491	0.68741	0.565674	0.759646	1.88664	2.26769	2.363	1.92485	2.07236	2.2543
Fam160a2	3.92513e-06	-1.38313	1.98702	2.47035	2.81435	2.32382	2.44255	2.03716	6.33854	5.61475	6.2682	6.12697	6.27669	6.08777
Soat1	3.92639e-06	-1.2586	2.32482	2.33379	2.2354	2.13789	2.44887	2.16894	5.1247	5.02927	5.49036	5.34201	6.07173	5.60071
Mtmr4	3.93756e-06	-1.70616	5.5363	4.49222	5.42912	4.58353	7.95101	5.4619	18.8927	15.1786	16.9968	17.8934	20.0834	20.1131
Elmo2	3.94294e-06	-1.04679	9.34666	10.8047	12.2986	9.89424	12.0704	10.1605	22.8851	21.5715	22.8032	22.0716	22.0832	21.9932
Slc39a14	3.94346e-06	-1.42584	2.15919	2.57637	2.37242	1.75747	2.30707	1.82629	6.26498	5.79434	6.01332	5.95113	5.57571	5.32447
Mmp24	3.96486e-06	-1.75571	2.14963	2.42081	3.18696	2.62725	4.3066	2.86811	10.3752	9.42076	9.54287	9.89024	10.2382	9.82954
Fam210a	3.96881e-06	-1.26353	1.6667	2.23435	2.29585	2.05928	1.8954	1.89414	4.46992	5.08024	4.69979	4.82776	5.274	4.56794
Tmem68	3.99619e-06	-1.32033	2.28424	3.43206	3.62649	3.15049	3.74902	3.33205	7.6928	8.80864	8.82842	7.59287	7.78052	8.17856
Glg1	4.00615e-06	-2.74936	4.66289	5.59728	4.97186	4.49963	5.75382	4.33303	36.1382	30.7047	29.3949	31.8728	37.0413	35.3529
Pgr	4.00643e-06	-2.0129	1.12658	0.827653	1.20628	0.893214	1.083	1.23114	3.80618	3.75074	4.73501	4.53767	4.29323	4.57744
Abcc9	4.0086e-06	-1.68429	0.239251	0.295874	0.420744	0.356838	0.275701	0.275311	0.967597	0.959067	1.15881	0.90409	0.959192	1.04091
Ptpra	4.0086e-06	-1.0304	10.7915	13.7209	13.0862	11.9791	15.0745	12.4507	26.3767	26.7759	25.2277	26.6604	26.6046	25.8443
Atg4c	4.01364e-06	-1.16393	4.44406	4.04698	4.39649	5.0202	3.82471	5.35255	9.79635	10.7783	9.74227	9.84099	9.44613	11.0847
Gspt1	4.02691e-06	-1.47954	5.9954	5.10456	5.94524	4.97829	6.2939	5.109	14.5354	16.5134	14.8676	15.5043	15.8501	15.9417
Lonrf2	4.02838e-06	-1.84413	12.301	13.7305	13.0383	12.1341	14.1724	13.2682	46.2024	43.4954	42.4787	46.3487	52.9783	50.8576
Basp1	4.03733e-06	-1.20759	100.102	110.832	131.451	104.217	110.588	126.165	271.22	244.313	278.392	273.324	251.05	259.923
Ahcyl1	4.05959e-06	-1.27307	45.374	47.044	47.9117	48.1231	49.8849	49.1535	117.131	125.268	120.334	114.66	107.662	109.739
Mtf1	4.06167e-06	-1.08489	1.97578	2.11394	1.73373	1.61728	1.95811	1.66717	4.13396	3.72657	3.79737	3.81323	4.05365	3.94863
Mgat3	4.06398e-06	-1.6666	12.4721	11.3507	13.3839	11.7186	16.9185	14.7802	47.0792	41.5749	42.6748	41.4963	43.1999	39.9279
Scyl2	4.06603e-06	-1.5061	2.93443	2.74469	3.03496	2.61363	2.03338	3.15246	7.44693	8.58063	7.5245	7.81978	6.76246	8.77098
Shprh	4.07081e-06	-1.47062	1.12411	1.11828	1.24522	1.56242	0.756862	1.36575	3.08291	3.3266	3.34592	3.30595	3.02373	3.79328
Clcn5	4.09313e-06	-1.88222	1.22097	1.5169	1.42319	1.542	1.92049	1.40072	5.36097	4.79692	5.3516	5.46436	6.243	6.05044
Dnajc27	4.10505e-06	-1.00454	16.8779	18.7826	19.8787	19.0284	21.9377	20.1204	39.9697	38.7845	38.6989	39.7542	38.6855	38.0945
Snx27	4.11057e-06	-1.07068	11.1792	12.2586	12.9154	11.7818	13.9459	12.3076	26.0852	25.0282	24.4195	24.9035	27.6321	28.1781
Btrc	4.11417e-06	-1.22375	3.40704	3.53475	3.88254	3.70989	4.61828	4.25026	9.59361	8.43147	8.34841	9.25952	9.79364	9.23128
Sacs	4.14435e-06	-2.12691	0.760448	0.659934	1.19195	0.746933	0.683994	0.816007	2.94085	3.63028	3.89932	3.64009	3.27968	3.83407
Mosmo	4.14835e-06	-1.90663	2.81202	2.88653	3.39164	3.09141	2.41087	2.86502	10.1906	10.9039	11.4068	10.3762	9.95314	12.6231
Ankib1	4.15294e-06	-1.35055	3.55159	3.33093	3.95246	4.6275	3.80477	3.69357	9.17118	8.85459	9.78363	9.76859	10.3072	10.6669
Erlin2	4.19636e-06	-1.01694	7.35574	7.64147	7.40252	7.68133	7.59492	6.75812	14.3296	14.2592	14.2906	16.2081	16.1884	14.6418
Coro2a	4.19855e-06	-2.1451	1.5908	1.15759	1.64368	1.67271	2.2814	1.9183	8.09856	7.5623	7.9393	7.14081	7.05954	7.60154
Dnajc16	4.21061e-06	-1.5848	3.38684	4.62693	4.52239	4.23521	4.69063	4.31858	13.3043	12.1329	12.5081	12.4384	14.413	12.5362
Endod1	4.21646e-06	-1.0776	19.54	21.5667	22.2812	20.1381	26.3474	20.5042	45.6763	44.7693	42.9686	48.2668	48.1788	45.3061
Pcsk6	4.22793e-06	-1.36269	2.90135	2.44665	2.79492	2.35053	2.82188	2.21542	7.40856	7.17752	6.36841	6.11139	6.93791	5.93586
Tarsl2	4.2317e-06	-1.26143	3.43684	4.53284	4.83568	4.01469	3.90318	4.44802	9.42591	10.6173	10.1106	11.0109	9.02151	10.1575
Pdpr	4.24374e-06	-2.59113	0.814179	0.682553	0.277474	0.532642	0.718376	0.736982	3.6064	3.36499	3.76338	3.92137	3.76542	4.24833
Jak1	4.24376e-06	-1.28922	6.95275	7.48497	8.74248	7.88657	8.38881	8.97617	20.2911	19.9899	18.0754	19.5741	20.0177	20.4165
Katnal1	4.24507e-06	-1.37725	4.05278	4.23385	4.53758	3.98811	4.18875	5.04608	12.0697	10.8845	10.2647	10.5352	11.5546	12.3547
Ss18l1	4.24544e-06	-1.43075	5.28562	5.34031	7.30383	6.73153	6.73659	5.24381	16.1217	14.1684	16.2043	18.1017	17.4663	16.7187
Vat1l	4.25675e-06	-1.7119	24.8058	30.0136	27.6846	30.2083	37.0294	28.765	91.7612	85.3239	90.0427	103.125	113.033	101.486
Setd7	4.26651e-06	-1.65531	7.51442	5.67586	7.15203	6.01826	5.96235	7.45609	21.2135	22.7077	21.6056	18.3552	19.0641	22.3545
Pdzrn4	4.27023e-06	-1.41389	1.28953	1.02112	1.14713	1.19322	0.988926	1.46272	3.02222	2.68201	3.22971	3.38128	3.17257	3.4375
Rbm45	4.2725e-06	-1.03114	5.19096	7.13314	6.52231	5.7605	6.19113	6.71937	11.9249	12.3193	13.715	12.9602	12.4264	13.3262
Arhgef17	4.27854e-06	-1.03536	11.9955	12.2219	12.6443	13.0882	14.2955	12.1339	27.3358	24.2162	24.3436	25.5542	29.1856	25.9134
Sik3	4.28178e-06	-1.24902	10.8002	12.052	12.702	11.7395	13.8556	11.8891	29.9977	27.2611	27.1187	27.3853	31.5223	30.3122
Tfrc	4.28918e-06	-1.01248	5.25534	7.7576	9.25441	8.86948	7.43648	7.2385	12.2591	16.7209	16.6887	15.8742	16.2737	14.603
Ube2e1	4.29095e-06	-1.70911	11.396	12.514	12.3725	9.14486	14.6509	10.5477	36.613	37.6029	38.4891	41.5286	38.3686	38.3155
Arfgap2	4.29356e-06	-2.12149	2.96528	3.36304	4.38691	3.05052	5.51988	3.54325	16.8227	17.749	14.5104	15.6957	18.322	16.2385
Traf3ip1	4.30129e-06	-1.21257	2.31439	2.19135	2.99758	2.76292	3.09901	2.65468	6.27663	5.44832	6.86173	5.67242	6.47505	6.39212
Sqle	4.3015e-06	-1.10333	15.5683	17.7576	17.5897	14.6697	16.0183	15.5694	33.116	33.369	35.3744	36.3133	36.3688	34.2357
Prkar2a	4.31907e-06	-1.62415	6.97481	6.75303	7.78483	7.45161	6.04425	7.28182	21.2381	21.0929	20.3488	22.0348	23.8189	21.8309
Pip5k1a	4.3403e-06	-1.13446	4.08463	4.94396	4.97787	4.40707	5.43093	5.0288	11.104	10.4966	10.2051	10.196	10.6477	10.7377
Ermp1	4.34846e-06	-1.01318	5.42339	5.52798	5.10543	5.36053	5.5903	5.0466	12.0506	11.1337	10.0446	10.6566	10.7822	10.0291
Aftph	4.34955e-06	-1.53745	4.91272	3.97938	4.53236	5.04435	3.77162	4.72878	12.0684	14.0891	12.7396	13.1609	12.7162	13.5125
Ptprg	4.3649e-06	-1.84945	1.67284	2.01232	2.12793	2.09062	1.89729	2.05578	6.42899	6.85133	6.72711	7.151	7.29032	8.27854
Pnmal1	4.37981e-06	-1.32609	19.567	27.5702	25.2567	21.5665	26.2744	25.2066	61.4719	59.3092	56.4723	59.2829	65.4975	62.6192
Rragd	4.40528e-06	-1.43262	5.17795	6.16532	6.83801	7.01966	4.84702	6.98927	16.4785	17.3158	17.0561	16.693	16.8027	15.6312
Alcam	4.42576e-06	-1.14155	9.98	12.6408	12.6459	12.9628	10.1589	11.6645	24.2717	27.6574	24.1868	25.9046	24.6584	27.8698
Tomm70a	4.43995e-06	-1.61997	8.72977	9.45379	11.1455	11.4233	9.21781	11.063	27.2065	34.7567	31.8767	33.4687	30.2294	30.0595
Vps33a	4.4472e-06	-1.52638	6.42928	7.52944	8.60155	7.41833	10.5161	8.57366	25.0708	22.2371	22.5922	23.1242	24.2187	24.1042
Foxj3	4.44806e-06	-1.14586	5.15938	5.59855	6.35794	6.11394	6.19804	6.69871	13.5863	12.013	12.8914	13.6099	14.3252	13.5145
Gnao1	4.44854e-06	-1.16645	28.4755	28.6068	32.4634	29.5925	32.1639	33.6876	74.5971	69.8637	69.2339	64.3852	67.1926	69.9515
Mast4	4.45167e-06	-1.54019	1.8095	1.52311	1.76845	1.76725	1.92403	1.92133	5.84998	4.55248	4.81	4.96174	5.5584	5.4262
Tmem241	4.45327e-06	-1.57707	1.00075	0.915639	0.697481	1.17409	0.939787	0.679636	2.746	2.48579	2.52656	2.85736	2.66336	2.85454
Snx30	4.46209e-06	-1.82806	2.59151	2.91353	2.67037	2.98874	2.3736	2.51963	9.53745	8.99692	10.4825	8.70798	9.80478	9.48366
Isca1	4.46311e-06	-1.04184	33.9314	37.8462	39.9328	36.7915	41.7446	39.6308	81.202	80.6087	77.0413	80.5002	79.2127	74.718
Wapl	4.47409e-06	-1.37016	2.82684	2.67186	3.10537	3.19399	3.01741	2.93586	6.99847	7.93495	7.83643	7.79052	7.04075	8.28582
Dcbld2	4.50412e-06	-2.88989	0.542127	0.731133	1.06746	0.500003	0.550342	0.551471	4.73514	4.75352	4.8738	4.32994	4.84438	5.68575
Nbea	4.50541e-06	-1.74376	3.68951	4.11479	5.7754	4.97809	3.74847	4.61348	13.9736	14.7175	14.3095	15.1571	15.7153	16.2832
Cmtm4	4.50875e-06	-1.79879	5.02072	6.54398	7.08718	5.37814	7.32464	6.64068	22.1038	20.2757	20.1391	22.6972	23.8592	23.1216
Dstyk	4.56336e-06	-1.94413	2.33632	2.59934	3.3483	2.95427	2.73969	2.84619	11.4624	11.0181	9.89226	10.1773	11.0578	11.1321
Pip4k2b	4.56908e-06	-1.51611	8.32834	10.6857	10.6882	9.82988	12.1913	11.185	32.2251	28.8687	28.1007	29.1163	30.9991	30.6207
B4galt5	4.58509e-06	-1.653	4.28741	4.8564	5.05293	4.63449	6.31506	5.10412	17.3849	14.9914	15.0375	16.0973	16.725	14.8974
Rnf217	4.58588e-06	-1.84532	0.384389	0.598168	0.6366	0.652258	0.629064	0.761561	2.06453	2.10518	2.15367	2.53226	1.96026	2.34298
Faxc	4.60479e-06	-3.25812	0.445983	0.423785	0.32247	0.262134	0.391942	0.41322	3.72211	2.96171	3.65007	3.50578	3.66605	4.11198
Trio	4.6118e-06	-1.75229	2.98984	2.81901	3.26223	2.87585	3.44989	3.18965	11.163	9.87833	9.6484	9.21333	11.367	11.3464
Zbtb4	4.64913e-06	-1.55751	6.39497	6.73894	6.8464	6.62752	6.73939	7.53089	20.5585	21.9039	21.0011	17.9331	18.2784	20.6482
Frmd4a	4.65408e-06	-1.16986	2.14017	1.77009	2.05339	2.00581	1.72215	1.95223	4.59313	4.21536	4.09864	4.15942	4.42433	4.70665
Klf7	4.65513e-06	-1.82651	1.08519	1.45067	1.56547	1.4688	1.19016	1.42238	4.42356	4.6631	5.19169	4.46503	4.68187	5.59687
Erc2	4.66255e-06	-1.69091	3.02172	2.72118	3.87695	3.00928	2.65035	2.85711	9.51402	10.0767	9.28838	9.96045	9.20427	10.512
Csnk1g3	4.68448e-06	-1.373	5.03613	5.52747	4.99517	5.09599	5.05582	5.16554	11.6396	13.8014	13.6004	12.7232	13.6541	14.5534
Gpbp1l1	4.69321e-06	-1.13505	4.21033	3.6804	3.62358	3.78997	4.12117	3.47255	8.23835	8.27701	7.90246	9.20587	8.2448	8.42145
Ptcd1	4.69849e-06	-1.22484	3.51291	2.79165	3.45797	3.00125	3.98761	3.68396	8.74755	7.70584	8.10211	7.68891	8.0056	7.51334
Lratd1	4.71138e-06	-1.78475	3.57382	4.09182	4.38148	3.31035	4.53991	4.37496	15.5159	14.113	13.3771	13.6577	13.4364	13.5324
Adnp	4.72055e-06	-1.01897	13.1442	16.0128	15.0096	15.0378	14.8646	16.0167	30.3812	29.3009	28.7661	30.8603	32.5443	30.7029
Cnnm1	4.74437e-06	-1.09693	7.98986	7.82842	10.382	8.29036	10.4272	9.20038	20.1267	18.644	18.9752	18.4632	19.8801	19.6694
Atxn1l	4.74488e-06	-1.39335	2.03901	1.74459	1.91522	1.78261	2.65537	1.6904	4.88655	4.73155	5.37045	4.99752	5.5649	5.51757
Gucy1a2	4.74895e-06	-3.32492	0.157277	0.16204	0.065573	0.153063	0.071277	0.056018	1.02403	1.15827	1.17493	1.30051	0.938416	1.07013
Slc25a16	4.7747e-06	-2.05319	1.3342	1.44045	2.84463	2.05145	1.95154	1.92218	7.16793	8.64904	9.2509	8.03525	6.99877	7.81012
Vwc2l	4.775e-06	-2.69806	0.525072	0.517269	0.663525	0.567331	0.601031	0.728791	3.6702	3.88858	3.48348	4.11988	4.48695	3.73195
Adam10	4.77997e-06	-1.45479	5.55202	6.35532	7.22651	6.15238	5.30826	6.26466	14.6767	17.4981	16.5401	16.8912	16.8329	18.598
Afg3l2	4.7995e-06	-1.03934	13.047	13.8028	15.4735	13.7594	16.1993	14.0614	30.6207	28.5313	30.5072	30.3772	30.9888	26.4352
Rnf149	4.81654e-06	-1.85101	2.92213	3.43602	4.20232	4.70484	4.10508	4.83942	12.3039	15.757	15.3515	15.9016	13.1979	14.8254
Uevld	4.81663e-06	-1.65342	1.29394	1.129	1.43573	1.17096	1.06605	1.477	4.32171	3.52917	3.74341	4.15131	4.02361	4.0529
Gdap1	4.81723e-06	-1.63963	6.98705	8.16255	11.1736	9.9578	7.15231	9.78401	23.6251	31.164	28.6008	28.7038	25.4753	28.2487
Slc6a6	4.83302e-06	-1.68968	4.74545	5.02853	6.24409	6.594	5.55468	6.77567	19.3437	17.785	18.4721	17.2251	20.2561	19.6375
Erbb4	4.84513e-06	-2.39157	0.73008	0.795746	1.06738	1.325	0.909417	1.06953	4.98709	5.27896	5.20311	5.4049	4.22297	5.84703
Zdhhc16	4.87213e-06	-1.44725	2.4613	3.18278	3.02249	2.49503	3.94672	2.61559	8.65771	8.02636	7.64332	7.3378	8.64227	8.02343
Fam169a	4.87551e-06	-1.70802	3.20866	4.06581	5.38076	4.75625	4.52004	5.2447	11.7146	15.3203	15.3914	15.6912	13.8051	16.8654
Gna13	4.9058e-06	-1.36907	5.73085	6.22786	4.50392	5.7915	5.68187	5.16022	13.6489	13.2684	13.7589	15.3232	15.3348	14.1549
Gpd2	4.91929e-06	-1.20992	6.69233	7.17227	7.49721	7.02271	7.54713	6.65865	16.3779	15.4566	15.2025	16.5111	17.9577	17.0163
L2hgdh	4.93867e-06	-1.18475	3.22013	3.0518	3.57078	4.13013	2.98445	3.27503	6.94974	7.99143	7.63409	7.89446	7.60449	7.91879
Cab39	4.93882e-06	-1.0619	22.5117	21.8283	25.2763	23.2944	18.0787	24.4343	43.3803	51.1521	51.033	46.7358	43.1924	47.2274
Cpd	4.94018e-06	-1.48133	4.63624	5.63181	5.28463	4.28078	4.78858	3.96112	13.482	13.0783	13.0329	12.5025	13.4486	14.2618
Utrn	4.94375e-06	-1.43534	1.54811	1.8644	1.91109	1.6439	1.41423	1.99769	4.45389	4.51926	4.54298	4.38099	4.74266	5.43095
Rnf115	4.9514e-06	-1.05645	8.7884	8.57442	8.55813	9.30211	8.74989	7.54632	17.3866	18.1266	19.8921	18.4428	17.0606	16.2413
Phf12	4.95912e-06	-1.69602	3.03591	3.55255	4.32013	3.98041	3.85239	4.04434	12.4558	10.5272	12.8327	11.5978	13.0879	13.3256
Slc25a32	4.97874e-06	-1.91097	0.588879	0.615504	0.581185	0.898943	0.446727	1.1118	2.28577	2.91239	2.70054	2.62414	2.43578	2.99784
Tbk1	5.05088e-06	-1.57217	4.68837	4.54737	4.12448	4.68669	3.886	4.87049	12.5751	13.4823	14.8948	13.6313	12.0635	13.0535
Aff4	5.08377e-06	-1.95841	6.14068	6.46289	6.70016	6.24671	5.76413	6.34532	22.2834	23.7538	22.7574	24.1631	25.4817	27.9198
Pcdhgb7	5.09749e-06	-2.46967	0.608181	0.598116	0.484085	0.521521	0.36541	0.740936	3.51089	2.9432	3.03876	2.79173	3.1826	2.91315
Cpsf6	5.09901e-06	-1.63336	3.64468	3.68846	4.11703	3.32214	3.48561	4.72217	10.2863	12.2379	11.483	11.7365	11.4418	14.1068
Mex3b	5.10349e-06	-2.11873	0.856208	0.974991	0.986387	1.165	0.571831	1.07672	3.93848	4.32636	4.72105	3.928	3.72408	3.81867
Hectd1	5.10914e-06	-1.39354	4.39368	4.84919	5.59138	4.77748	5.50802	4.87869	12.1992	13.4423	12.3123	12.3552	14.125	14.3787
Dnaja4	5.11308e-06	-1.96575	4.37954	3.17887	4.17512	2.19639	4.21979	3.5198	16.1299	14.5696	13.4726	11.0654	14.2856	15.1214
Mboat2	5.11616e-06	-1.14261	3.93262	4.63355	4.51266	4.01046	5.27653	4.46922	8.85739	9.61396	9.57289	10.6445	10.5348	10.023
Rnf38	5.12407e-06	-1.22799	2.39708	2.97029	2.71131	3.25363	2.51881	2.77721	5.95661	6.24338	6.57127	6.46261	6.76256	6.95386
Strn3	5.12823e-06	-2.03145	3.73518	2.66109	4.115	4.51964	3.70564	5.85896	15.3192	16.8825	18.6375	17.2222	14.2963	18.1928
[truncated: 5,620 more rows]
